# Supplementary material
Source: PubMed Central journal article supplement (PMC3070239)
Supplement: NIHMS34171-supplement-1.pdf [file NIHMS34171-supplement-1.pdf]

## Supplementary Figures

### CRISPR RNA maturation by *trans*-encoded small RNA and host factor RNase III

This file contains:

| Figure | Title                                                                                                                           | Page |
|--------|---------------------------------------------------------------------------------------------------------------------------------|------|
| 1      | Genomic organization of type II (Nmeni/CASS4) CRISPR/Cas loci in <i>S. pyogenes</i>                                             | 3    |
| 2      | Characterization of CRISPR01 pre-crRNA and crRNAs in <i>S. pyogenes</i> SF370                                                   | 5    |
| 3      | RT-PCR analysis of tracrRNA, CRISPR01 crRNA and CRISPR02 crRNA expression in <i>S. pyogenes</i> SF370                           | 7    |
| 4      | Conservation and expression of tracrRNA in <i>S. pyogenes</i>                                                                   | 8    |
| 5      | <i>In silico</i> co-foldings of tracrRNA and crRNA species                                                                      | 11   |
| 6      | Role of endogenous RNase III in tracrRNA-mediated maturation of pre-crRNA <i>in vivo</i>                                        | 13   |
| 7      | Compensatory base-pair exchanges confirm tracrRNA-mediated crRNA maturation <i>in vitro</i>                                     | 14   |
| 8      | Role of Cas proteins in the processing of tracrRNA and pre-crRNA <i>in vivo</i>                                                 | 16   |
| 9      | tracrRNA, pre-crRNA, RNase III and Csn1 confer immunity against acquisition of a lysogenic phage-protospacer gene               | 19   |
| 10     | Genomic organization of type II (Nmeni/CASS4) CRISPR/Cas systems from selected bacterial species                                | 21   |
| 11     | Alignment of predicted tracrRNA homologues from selected bacterial species                                                      | 23   |
| 12     | tracrRNA homologue and pre-crRNA are expressed and processed in <i>Streptococcus mutans</i> UA159                               | 24   |
| 13     | tracrRNA homologue and pre-crRNA are expressed and processed in <i>Streptococcus thermophilus</i> LMD-9 (1 <sup>st</sup> locus) | 26   |

|    |                                                                                                                      |    |
|----|----------------------------------------------------------------------------------------------------------------------|----|
| 14 | tracrRNA homologue and pre-crRNA are expressed and processed in <i>S. thermophilus</i> LMD-9 (2 <sup>nd</sup> locus) | 27 |
| 15 | tracrRNA homologue and pre-crRNA are expressed and processed in <i>Listeria innocua</i> Clip11262                    | 29 |
| 16 | tracrRNA homologue and pre-crRNA are expressed and processed in <i>Neisseria meningitidis</i> Z2491                  | 31 |
| 17 | pre-crRNA but no tracrRNA homologue is expressed and processed in <i>Staphylococcus epidermidis</i> RP62a            | 33 |
|    | References                                                                                                           | 35 |

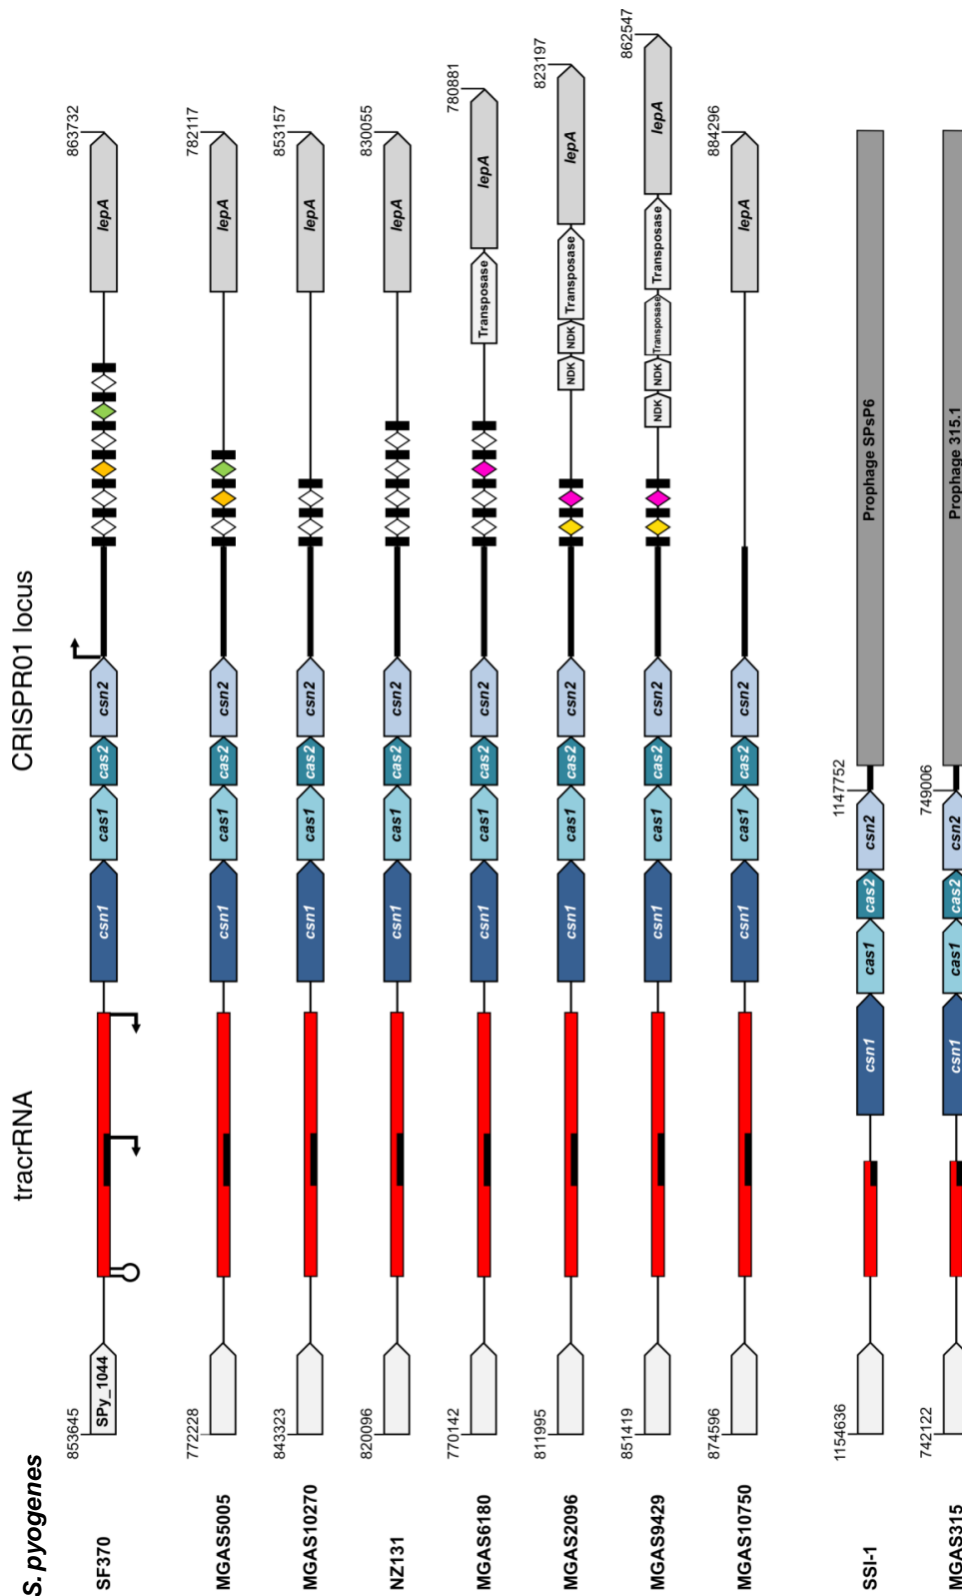

**Supplementary Figure 1 | Genomic organization of type II (Nmeni/CASS4) CRISPR/Cas loci in *S. pyogenes*.** A putative tracrRNA homologue (red) is encoded upstream of the CRISPR01/Cas locus in available sequenced genomes of *S. pyogenes*. The black bar within tracrRNA represents the sequence complementary to each CRISPR01 repeat. The CRISPR01 Cas genes (*csn1-cas1-cas2-csn2*) are followed by the

CRISPR01 leader sequence and repeat-spacer region (Supplementary Tables 1-5). Black rectangles, CRISPR01 repeats; diamonds, CRISPR01 spacers. Spacers of the same color are of identical sequence. White-filled spacers are unique in sequence. Transcriptional start sites and a Rho-independent transcription terminator are indicated. Note that in MGAS6180, MGAS2096 and MGAS9429 genomes, a transposase-encoding gene is inserted between the CRISPR01 repeat-spacer array and the *lepA* gene. The presence of transposons might be an indication for their previous involvement in the acquisition of CRISPR01-associated genes and/or sequences by *S. pyogenes* and their propagation by horizontal gene transfer among *S. pyogenes* and/or to other bacterial species. Although the MGAS10750 genome contains the CRISPR01-associated genes and leader sequence, no repeat-spacer array is present. In SSI-1 and MGAS315 genomes, a prophage sequence is inserted just downstream of the CRISPR01 leader sequence and no repeat-spacer array is present. Variations in the architecture of CRISPR loci among clinical isolates suggest rapid CRISPR evolution in this pathogen. In total considering both CRISPR01 and CRISPR02 (Supplementary Tables 1- 4), 23 spacers were found in the *S. pyogenes* analyzed genomes, from which 14 are unique and 4 are present in more than one genome. Six CRISPR loci contain one or two spacers with 80 to 100% sequence identity to endogenous target protospacers, suggesting a complex mechanism for self versus non-self discrimination in the pathogen.

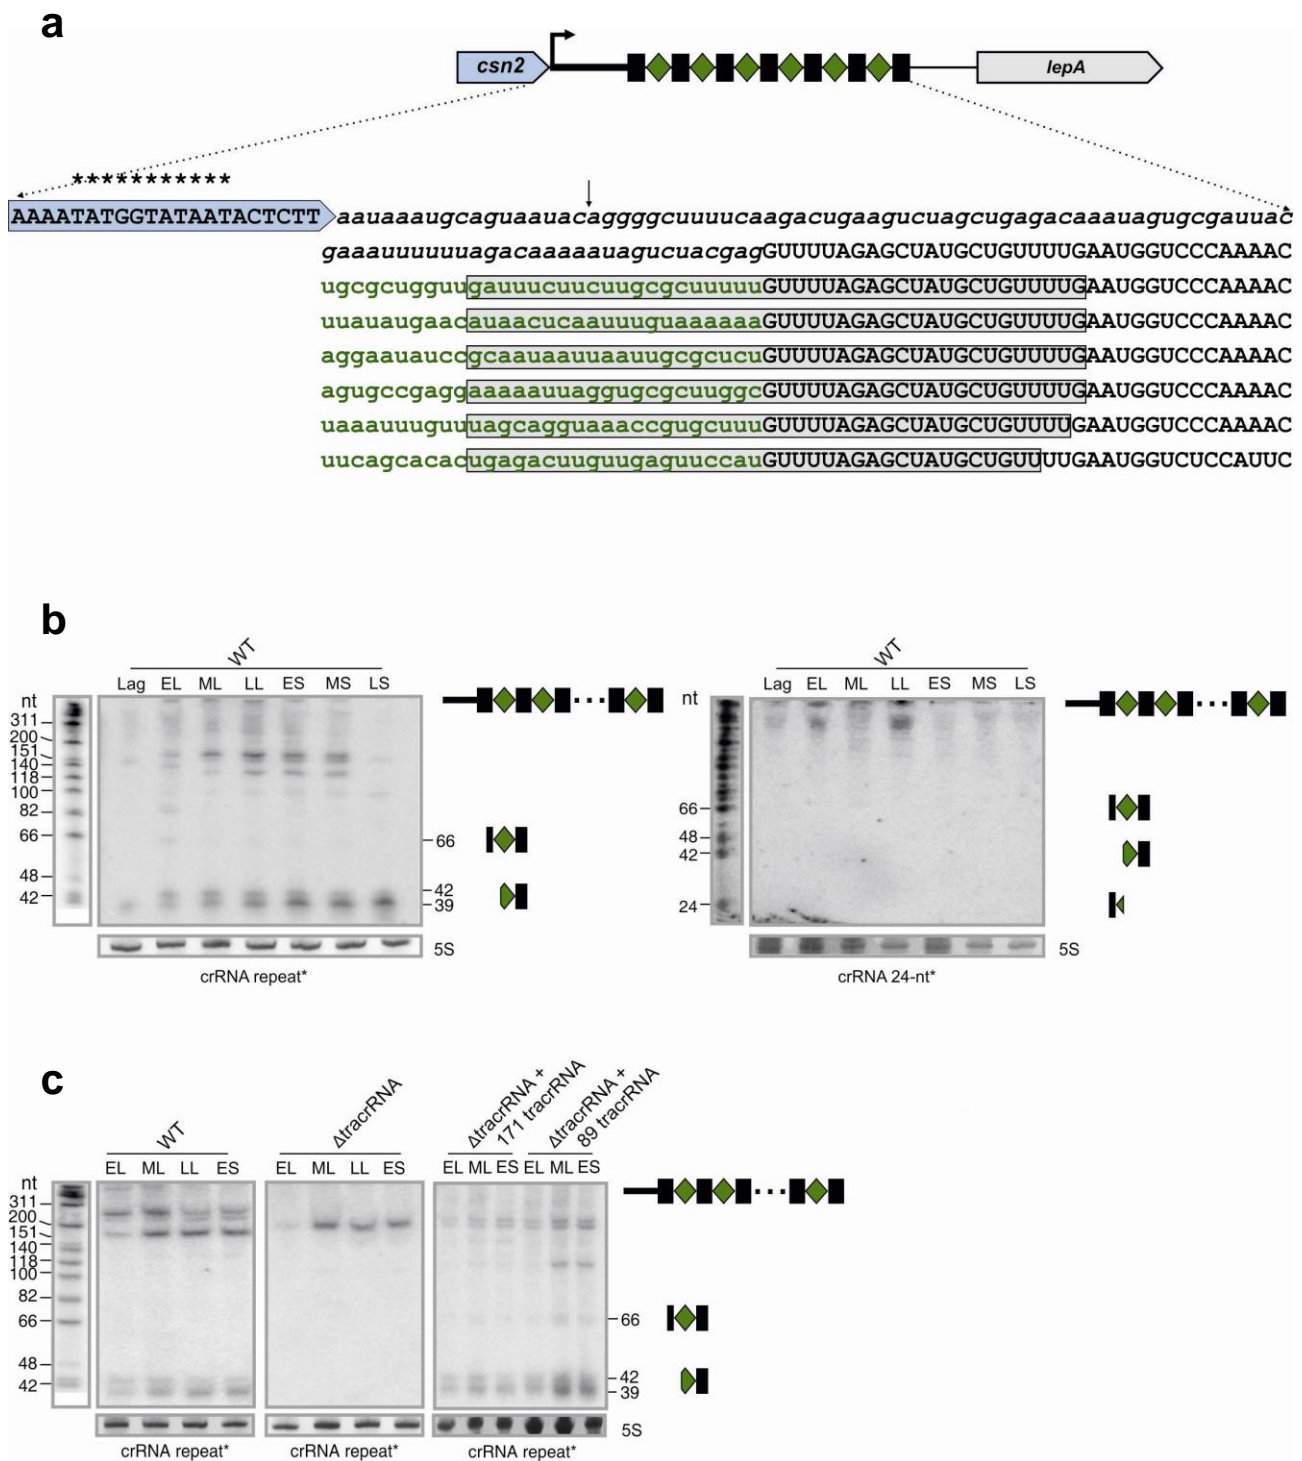

**Supplementary Figure 2 | Characterization of CRISPR01 pre-crRNA and crRNAs in *S. pyogenes* SF370.** **a**, pre-crRNA sequence. A leader sequence precedes the repeat-spacer region. Blue-highlighted, 3' end of the *csn2* gene; \*, putative -10 promoter sequence of pre-crRNA; ↓, 5' end determined experimentally by head-to-tail circularization (data not shown); italic, leader sequence; lowercase, repeats; uppercase, spacers; grey-

highlighted sequence, longest and most relevant processed crRNA species observed by *in vivo* dRNA-seq (Fig. 1a,b). The sequence represented is from coordinates 860709 to 861256 (Accession number: NC\_002737, SF370 genome). The leader sequence of the CRISPR01 locus is conserved among *S. pyogenes* genomes with available complete sequence containing CRISPR01 (Supplementary Tables 1,2). **b**, CRISPR01 crRNA is expressed as a pre-crRNA that is further processed into mature crRNAs. Northern blot analysis of crRNA expression in *S. pyogenes* SF370 cultures at different time points during growth: Lag; EL, early-logarithmic; ML, mid-logarithmic; LL, late-logarithmic; ES, early-stationary; MS, mid-stationary; LS, late-stationary. The blot was hybridized with probes specific to the CRISPR01 repeat (OLEC1049) (crRNA repeat\*) (left panel) and to a 24-nt 1<sup>st</sup> repeat fragment (last 13 nt at the 3' end of the repeat)–2<sup>nd</sup> spacer fragment (first 11 nt at the 5' end of the spacer) (OLEC1684) (crRNA 24-nt\*) (right panel). 5S rRNA (OLEC288) was used as loading control (Supplementary Table 10). pre-crRNA is processed into 66 nt intermediate repeat-spacer-repeat crRNAs by a first cleavage within each repeat (1<sup>st</sup> processing event; only observed for the 1<sup>st</sup> repeat-spacer in dRNA-seq data and expressed at very low level as shown here by northern blot analysis). This is followed by a second cleavage within the spacers resulting in mature 39-42 nt spacer (~20 nt)-repeat (~19-22 nt) crRNAs (2<sup>nd</sup> processing event). Note that the 2<sup>nd</sup> processing event occurs at a specific distance from the 1<sup>st</sup> cleavage within the repeats. Considering that spacer sequences are not identical among each other, it is thus likely that the 2<sup>nd</sup> processing event within the spacers is distance-dependent rather than sequence-dependent. Low abundance of 66 nt crRNAs suggests efficient, concomitant and rather fast 1<sup>st</sup> and 2<sup>nd</sup> processings into shorter forms. Note as well that the leader-proximal crRNA was the most abundant species. The third form corresponds to the remaining ~24 nt repeat-spacer, presumably an inactive species. This form, which should be generated from the 2<sup>nd</sup> processing event, was neither observed in the dRNA-seq data nor by northern blot analysis (see right panel), most probably because of instability or rapid degradation. **c**, tracrRNA directs the maturation of pre-crRNA. Northern blot analysis of crRNA expression in *S. pyogenes* cultures at different time points during growth (refer to b). Strains: wild-type (WT) (SF370),  $\Delta$ tracrRNA,  $\Delta$ tracrRNA + 89 tracrRNA ( $\Delta$ tracrRNA complemented with 89 nt tracrRNA form) and  $\Delta$ tracrRNA + 171 tracrRNA ( $\Delta$ tracrRNA complemented with 171 nt tracrRNA form). Probe: crRNA repeat\* (OLEC1049). Processing of pre-crRNA into mature crRNA forms (39-42 nt) is abrogated in  $\Delta$ tracrRNA. Complementing  $\Delta$ tracrRNA *in trans* with the 171 or 89 nt tracrRNA form restores the processing. Co-processing of tracrRNA and pre-crRNA occurs constitutively throughout growth (refer to Supplementary Fig. 4c).

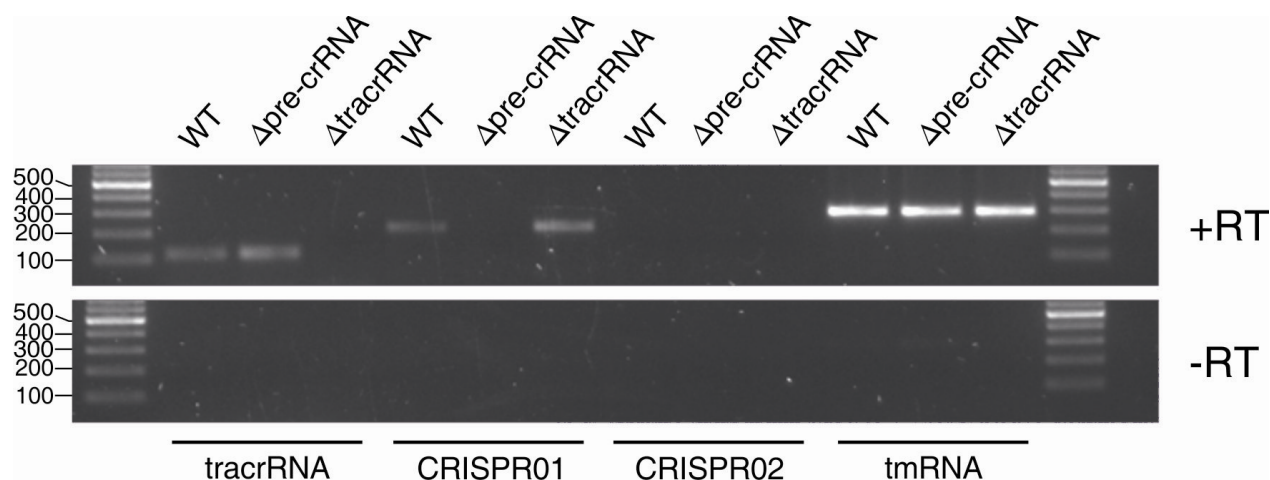

**Supplementary Figure 3 | RT-PCR analysis of tracrRNA, CRISPR01 crRNA and CRISPR02 crRNA expression in *S. pyogenes* SF370.** Total RNA from *S. pyogenes* cultures grown until mid-logarithmic phase was used for reverse-transcription followed by PCR using primers specific for tracrRNA (OLEC1299+OLEC1522), CRISPR01 crRNA (OLEC1140+OLEC1141), CRISPR02 crRNA (OLEC1219+OLEC1220) and tmRNA (OLEC140+OLEC449) (Supplementary Table 10). PCR-generated fragments were analyzed by agarose gel electrophoresis. RT-PCR analysis reveals tracrRNA expression in the wild-type (WT) (SF370) strain and  $\Delta$ pre-crRNA (CRISPR01) deletion mutant, and CRISPR01 pre-crRNA expression in the wild-type (WT) (SF370) strain and  $\Delta$ tracrRNA mutant. However, no expression of CRISPR02 crRNA in WT,  $\Delta$ tracrRNA and  $\Delta$ pre-crRNA (CRISPR01) strains could be detected. Additionally, no CRISPR02 pre-crRNA or crRNA expression in *S. pyogenes* WT could be observed by northern blot analysis (data not shown). These data do not rule out the possibility that CRISPR02 crRNA could be expressed and active at very low level under the conditions tested or under specific growth conditions, which remain to be determined.

a

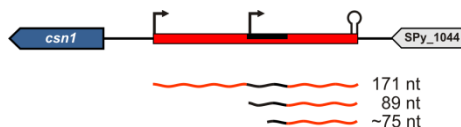

SF370-M1 TCCGAAATTAGTTAATATGCTTAAATTTTCTTTTCAAATAATCTCTTCAAAAAATATTACCCAATACTTAATAATAAATAGATTATAACACAAAATT  
 MGAS5005-M1 TCCGAAATTAGTTAATATGCTTAAATTTTCTTTTCAAATAATCTCTTCAAAAAATATTACCCAATACTTAATAATAAATAGATTATAACACAAAATT  
 MGAS10270-M2 TCCGAAATTAGTTAATATGCTTAAATTTTCTTTTCAAATAATCTCTTCAAAAAATATTACCCAATACTTAATAATAAATAGATTATAACACAAAATT  
 MGAS10750-M4 TCCGAAATTAGTTAATATGCTTAAATTTTCTTTTCAAATAATCTCTTCAAAAAATATTACCCAATACTTAATAATAAATAGATTATAACACAAAATT  
 MGAS2096-M12 TCCGAAATTAGTTAATATGCTTAAATTTTCTTTTCAAATAATCTCTTCAAAAAATATTACCCAATACTTAATAATAAATAGATTATAACACAAAATT  
 MGAS9429-M12 TCCGAAATTAGTTAATATGCTTAAATTTTCTTTTCAAATAATCTCTTCAAAAAATATTACCCAATACTTAATAATAAATAGATTATAACACAAAATT  
 MGAS6180-M28 TCCGAAATTAGTTAATATGCTTAAATTTTCTTTTCAAATAATCTCTTCAAAAAATATTACCCAATACTTAATAATAAATAGATTATAACACAAAATT  
 MGAS315-M3 TCCGAAATTAGTTAATATGCTTAAATTTTCTTT-----  
 SSI1-M3 TCCGAAATTAGTTAATATGCTTAAATTTTCTTT-----  
 Manfredo-M5 -----  
 MGAS10394-M6 -----  
 MGAS8232-M18 -----

SF370-M1 CTTTAAAAAGTAGTTTATTTTGTATCATCTCTATAGTATTAAGTATTGTTTATGGCTGATAAATTTCTTTGAATTTCTCCTTGATTATTTGTTATAAA  
 MGAS5005-M1 CTTTAAAAAGTAGTTTATTTTGTATCATCTCTATAGTATTAAGTATTGTTTATGGCTGATAAATTTCTTTGAATTTCTCCTTGATTATTTGTTATAAA  
 MGAS10270-M2 CTTTAAAAAGTAGTTTATTTTGTATCATCTCTATAGTATTAAGTATTGTTTATGGCTGATAAATTTCTTTGAATTTCTCCTTGATTATTTGTTATAAA  
 MGAS10750-M4 CTTTAAAAAGTAGTTTATTTTGTATCATCTCTATAGTATTAAGTATTGTTTATGGCTGATAAATTTCTTTGAATTTCTCCTTGATTATTTGTTATAAA  
 MGAS2096-M12 CTTTAAAAAGTAGTTTATTTTGTATCATCTCTATAGTATTAAGTATTGTTTATGGCTGATAAATTTCTTTGAATTTCTCCTTGATTATTTGTTATAAA  
 MGAS9429-M12 CTTTAAAAAGTAGTTTATTTTGTATCATCTCTATAGTATTAAGTATTGTTTATGGCTGATAAATTTCTTTGAATTTCTCCTTGATTATTTGTTATAAA  
 MGAS6180-M28 CTTTAAAAAGTAGTTTATTTTGTATCATCTCTATAGTATTAAGTATTGTTTATGGCTGATAAATTTCTTTGAATTTCTCCTTGATTATTTGTTATAAA  
 MGAS315-M3 -----  
 SSI1-M3 -----  
 Manfredo-M5 -----  
 MGAS10394-M6 -----  
 MGAS8232-M18 -----

SF370-M1 AGTTATAAAATAATCTTGTGGAAACCATTCAAACAGCATAGCAAGTAAATAAAGGCTAGTCCGTTATCAACTTGAAAAAGTGGCACCAGTCGGTGCT >>>>>> <<<<<<  
 MGAS5005-M1 AGTTATAAAATAATCTTGTGGAAACCATTCAAACAGCATAGCAAGTAAATAAAGGCTAGTCCGTTATCAACTTGAAAAAGTGGCACCAGTCGGTGCT  
 MGAS10270-M2 AGTTATAAAATAATCTTGTGGAAACCATTCAAACAGCATAGCAAGTAAATAAAGGCTAGTCCGTTATCAACTTGAAAAAGTGGCACCAGTCGGTGCT  
 MGAS10750-M4 AGTTATAAAATAATCTTGTGGAAACCATTCAAACAGCATAGCAAGTAAATAAAGGCTAGTCCGTTATCAACTTGAAAAAGTGGCACCAGTCGGTGCT  
 MGAS2096-M12 AGTTATAAAATAATCTTGTGGAAACCATTCAAACAGCATAGCAAGTAAATAAAGGCTAGTCCGTTATCAACTTGAAAAAGTGGCACCAGTCGGTGCT  
 MGAS9429-M12 AGTTATAAAATAATCTTGTGGAAACCATTCAAACAGCATAGCAAGTAAATAAAGGCTAGTCCGTTATCAACTTGAAAAAGTGGCACCAGTCGGTGCT  
 MGAS6180-M28 AGTTATAAAATAATCTTGTGGAAACCATTCAAACAGCATAGCAAGTAAATAAAGGCTAGTCCGTTATCAACTTGAAAAAGTGGCACCAGTCGGTGCT  
 MGAS315-M3 -----TTCAAACAGCATAGCAAGTAAATAAAGGCTAGTCCGTTATCAACTTGAAAAAGTGGCACCAGTCGGTGCT  
 SSI1-M3 -----TTCAAACAGCATAGCAAGTAAATAAAGGCTAGTCCGTTATCAACTTGAAAAAGTGGCACCAGTCGGTGCT  
 Manfredo-M5 -----GACACCATTCAAACAGCATAGCAAGTAAATAAAGGCTAGTCCGTTATCAACTTGAAAAAGTGGCACCAGTCGGTGCT  
 MGAS10394-M6 -----TGACACCATTCAAACAGCATAGCAAGTAAATAAAGGCTAGTCCGTTATCAACTTGAAAAAGTGGCACCAGTCGGTGCT  
 MGAS8232-M18 -----TTGGACCATTCAAACAGCATAGCAAGTAAATAAAGGCTAGTCCGTTATCAACTTGAAAAAGTGGCACCAGTCGGTGCT

SF370-M1 TTTTCTT-GATACTTCTATTCTACTCTGACTGCAAACTAAAAACAAGCGCTTCAAACGCTTGTTTATCATTTTTAGGGAAATTAATCTCTTAATCC <<<<<<  
 MGAS5005-M1 TTTTCTT-GATACTTCTATTCTACTCTGACTGCAAACTAAAAACAAGCGCTTCAAACGCTTGTTTATCATTTTTAGGGAAATTAATCTCTTAATCC  
 MGAS10270-M2 TTTTCTT-GATACTTCTATTCTACTCTGACTGCAAACTAAAAACAAGCGCTTCAAACGCTTGTTTATCATTTTTAGGGAAATTAATCTCTTAATCC  
 MGAS10750-M4 TTTTCTT-GATACTTCTATTCTACTCTGACTGCAAACTAAAAACAAGCGCTTCAAACGCTTGTTTATCATTTTTAGGGAAATTAATCTCTTAATCC  
 MGAS2096-M12 TTTTCTT-GATACTTCTATTCTACTCTGACTGCAAACTAAAAACAAGCGCTTCAAACGCTTGTTTATCATT-----  
 MGAS9429-M12 TTTTCTT-GATACTTCTATTCTACTCTGACTGCAAACTAAAAACAAGCGCTTCAAACGCTTGTTTATCATT-----  
 MGAS6180-M28 TTTTCTT-GATACTTCTATTCTACTCTGACTGCAAACTAAAAACAAGCGCTTCAAACGCTTGTTTATCATT-----  
 MGAS315-M3 TTTTCTT-GATACTTCTATTCTACTCTGACTGCAAACTAAAAACAAGCGCTTCAAACGCTTGTTTATCATTTTTAGGGAAATTAATCTCTTAATCC  
 SSI1-M3 TTTTCTT-GATACTTCTATTCTACTCTGACTGCAAACTAAAAACAAGCGCTTCAAACGCTTGTTTATCATTTTTAGGGAAATTAATCTCTTAATCC  
 Manfredo-M5 TTTTCTT-GATACTTCTATTCTACTCTGACTGCAAACTAAAAACAAGCGCTTCAAACGCTTGTTTATCATTTTTAGGGAAATTAATCTCTTAATCC  
 MGAS10394-M6 TTTTCTT-GATACTTCTATTCTACTCTGACTGCAAACTAAAAACAAGCGCTTCAAACGCTTGTTTATCATTTTTAGGGAAATTAATCTCTTAATCC  
 MGAS8232-M18 TTTTCTT-GATACTTCTATTCTACTCTGACTGCAAACTAAAAACAAGCGCTTCAAACGCTTGTTTATCATTTTTAGGGAAATTAATCTCTTAATCC



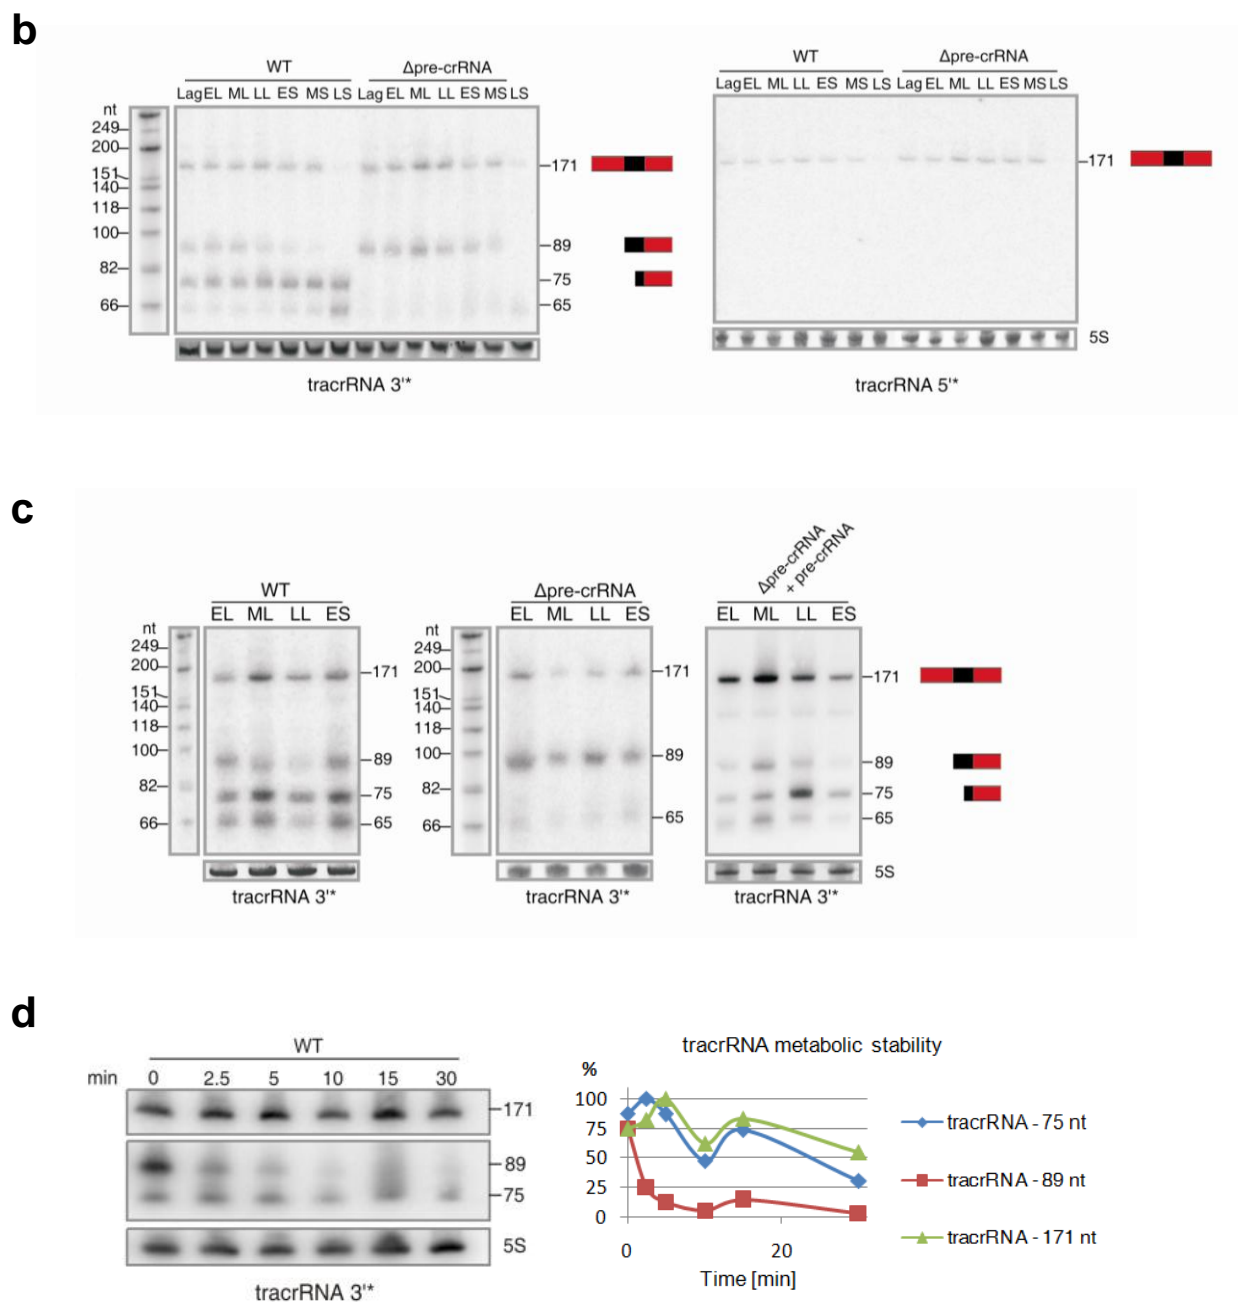

**Supplementary Figure 4 | Conservation and expression of tracrRNA in *S. pyogenes*.**

**a**, Sequence alignment of tracrRNA loci from *S. pyogenes* genomes with available complete sequence. The sequence is given from 5' (coordinate 854677) to 3' (coordinate 854279) (minus strand of the SF370 genome; Accession number: NC\_002737). Blue, -35 and -10 promoter regions; green and facing arrows, Rho-independent transcriptional terminator; red, alternative 5' ends as determined by primer extension and head-to-tail circularization (data not shown); grey, mismatches. Full-length tracrRNA is present and conserved among *S. pyogenes* genomes that contain the CRISPR01-associated genes and CRISPR01 leader-repeat-spacer array (Supplementary Fig. 1; Supplementary Table 1). In the MGAS10750 genome, which only contains the CRISPR01-associated genes, full-length tracrRNA-encoding DNA is also present (Supplementary Fig. 1; Supplementary Table 1). In the SSI-1 and MGAS315 genomes, which also only contain the CRISPR01-

associated genes and in the Manfredo, MGAS8232 and MGAS10394 genomes, which do not contain both the CRISPR01-associated genes and CRISPR01 leader-repeat-spacer array, the *tracrRNA* locus is truncated in its 5' end (Supplementary Fig. 1; Supplementary Table 1) and thus lacks the promoter region. This indicates a close interconnection between the presence of *tracrRNA* and a functional CRISPR01 locus. **b**, *tracrRNA* is observed as four species expressed throughout growth. Northern blot analysis of *tracrRNA* expression in *S. pyogenes* cultures at different time points during growth (refer to Supplementary Fig. 2b). Strains: wild-type (WT) (SF370) and  $\Delta$ pre-crRNA. Probes: *tracrRNA* 5'\* (OLEC1698), *tracrRNA* 3'\* (OLEC1697 or OLEC1014) and 5S rRNA (OLEC288) as loading control (Supplementary Table 10). *tracrRNA* is an abundant small non-coding RNA that is observed as four species: 171, 89, ~75 and 65 nt. The ~75 nt band corresponds to a processed form generated from the longer *tracrRNA* forms (171 and 89 nt) (Fig. 1a,b). **c**, pre-crRNA is essential for the processing of *tracrRNA*. Northern blot analysis of *tracrRNA* expression in *S. pyogenes* cultures at different time points during growth (refer to b). Strains: wild-type (WT) (SF370),  $\Delta$ pre-crRNA and  $\Delta$ pre-crRNA + pre-crRNA ( $\Delta$ pre-crRNA complemented with pre-crRNA). Probe: *tracrRNA* 3'\* (OLEC1014) (Supplementary Table 10). Processing of *tracrRNA* is abrogated in  $\Delta$ pre-crRNA. Complementing  $\Delta$ pre-crRNA *in trans* with pre-crRNA restores the processing. Co-processing of *tracrRNA* and pre-crRNA occurs constitutively throughout growth (refer to Supplementary Fig. 2c). **d**, Metabolic stability of *tracrRNA*. *S. pyogenes* wild-type (WT) (SF370) cultures at mid-logarithmic phase of growth were treated with rifampicin for the indicated times to stop transcription. Total RNA was then prepared and analyzed by northern blot analysis. Probes: *tracrRNA* 3'\* (OLEC1697) and 5S rRNA (OLEC288) as loading control (Supplementary Table 10). The half-life is defined as the point at which 50% of the RNA was degraded. y axis, relative amount of *tracrRNA*; x axis, time (min.). Data are representative of three independent experiments. Note that the 89 nt form is the least stable, suggesting its rapid processing. Together with the signal intensities of 171, 89 and ~75 nt bands observed on the northern blot (refer to b), the 89 nt form seems to be preferentially processed compared to the 171 nt form.

**a**

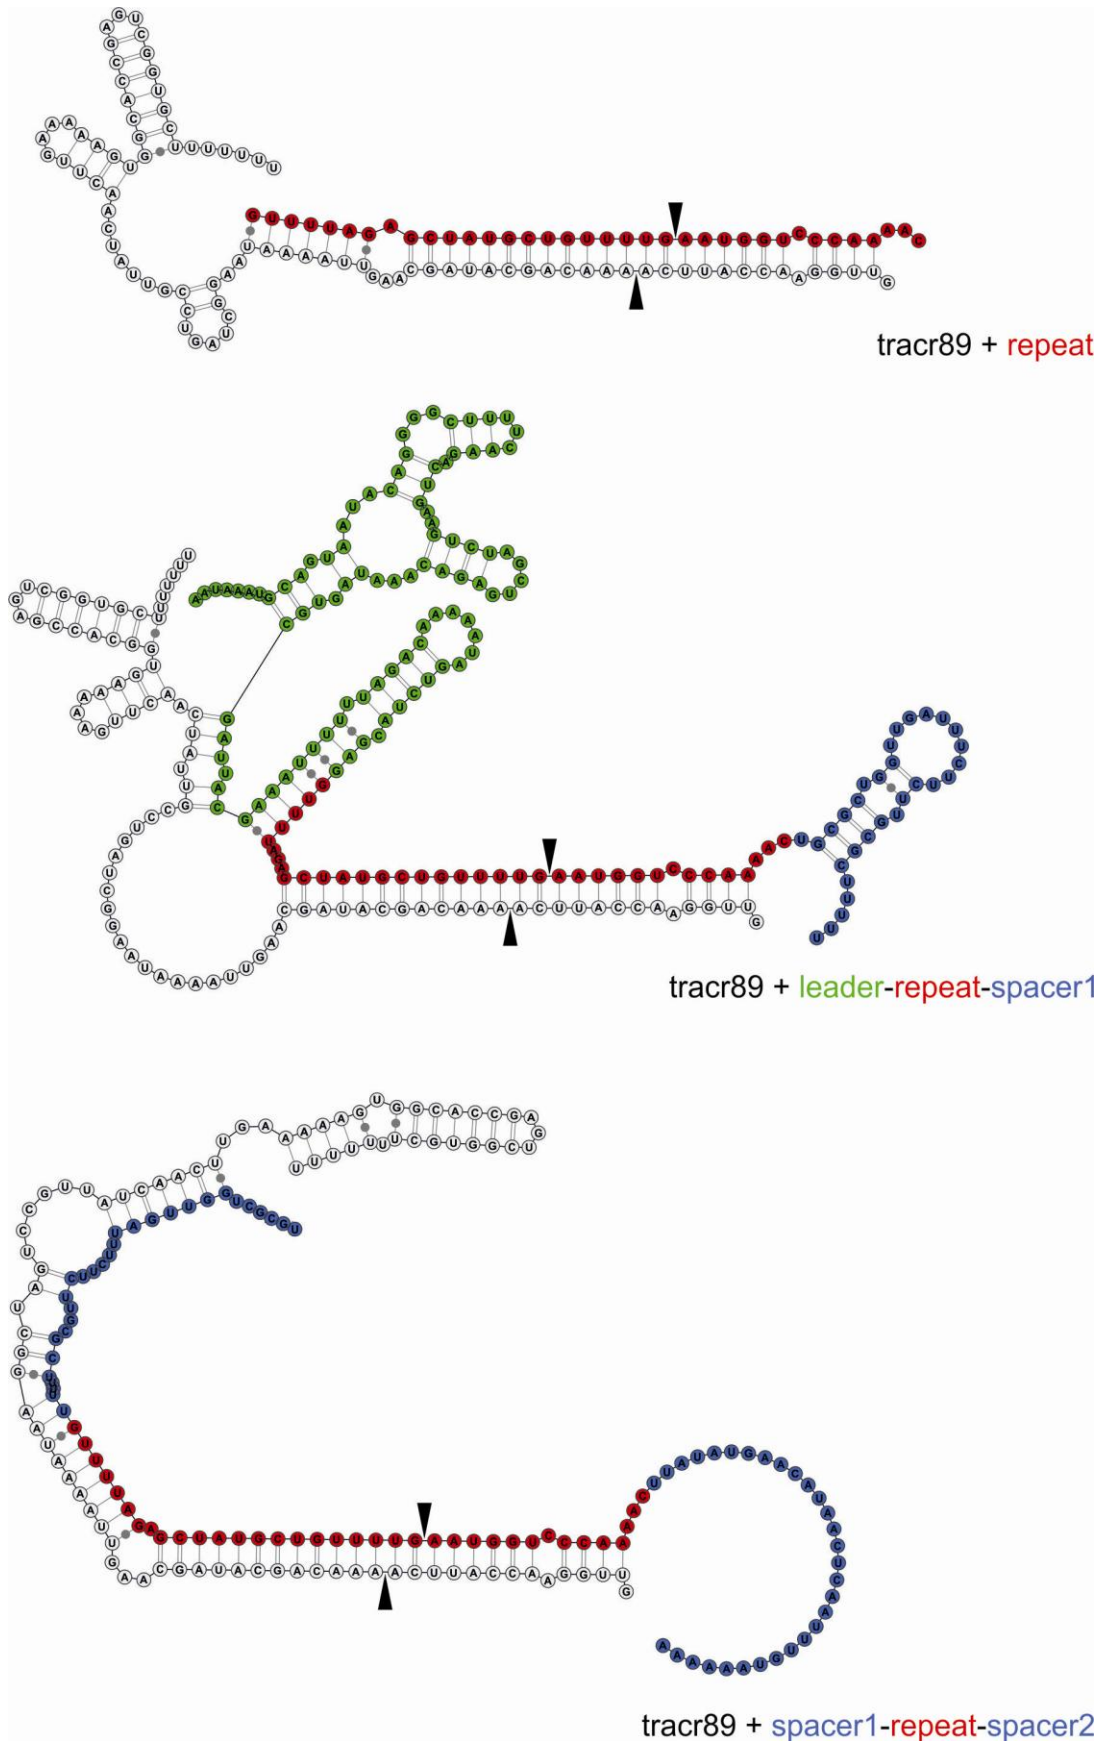

b

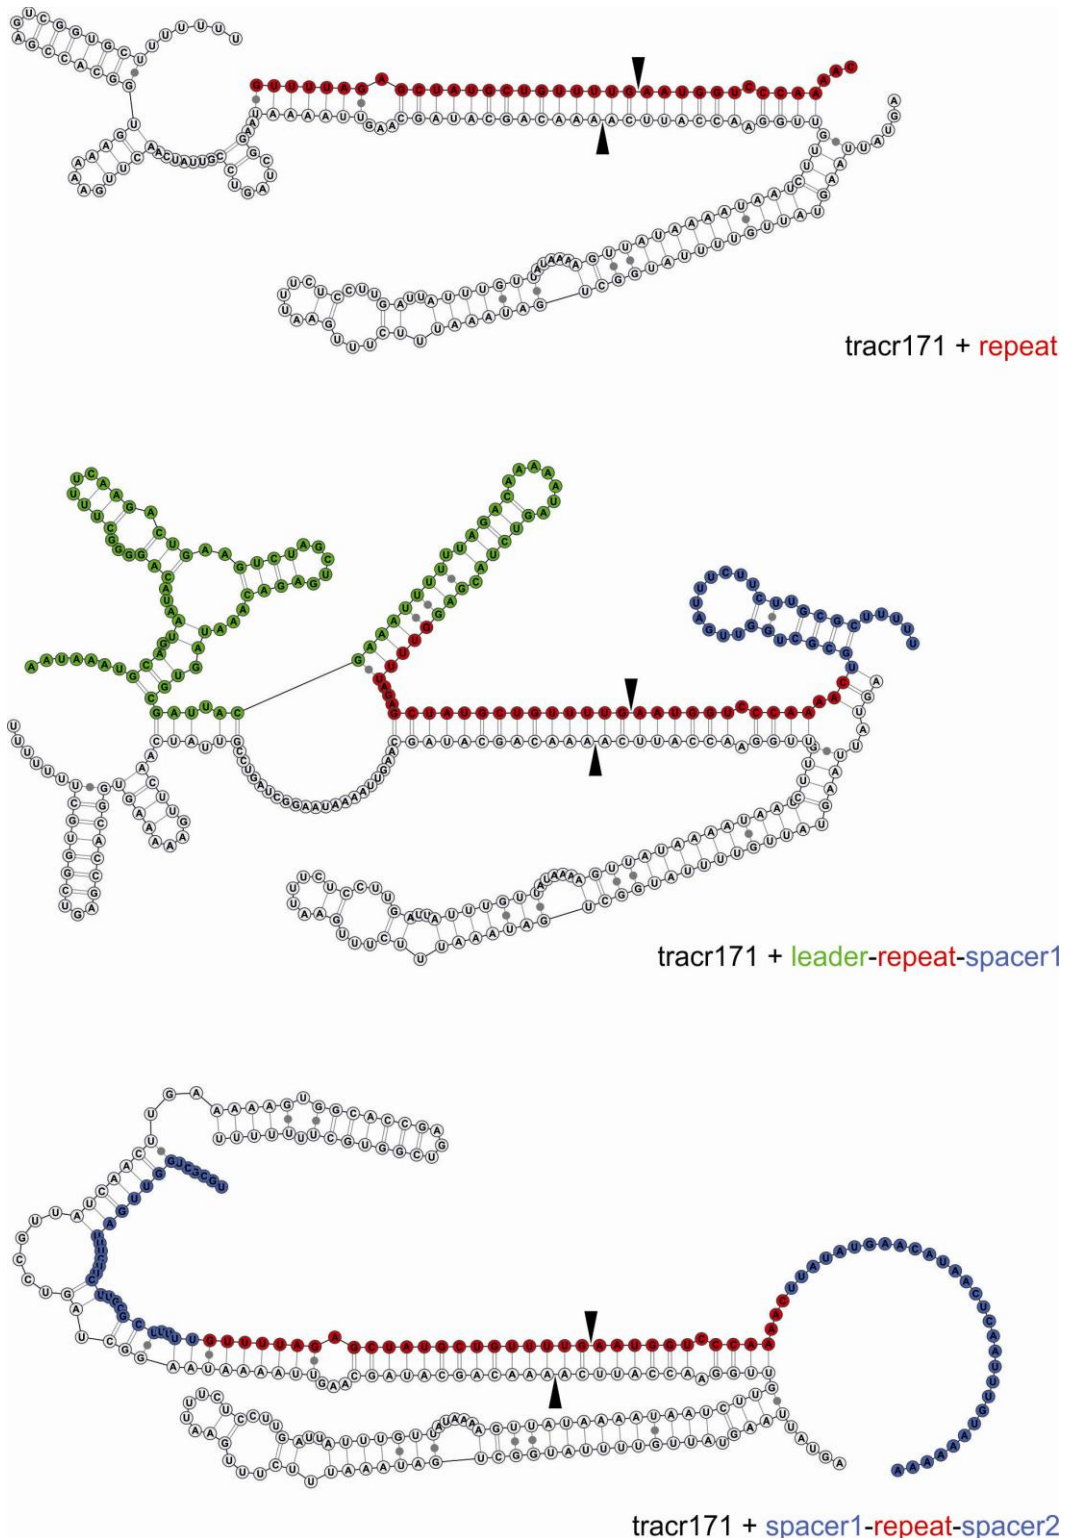

**Supplementary Figure 5 | *In silico* co-foldings of tracrRNA and crRNA species.** Both 171 nt and 89 nt tracrRNA species basepair with the CRISPR01 repeat sequence regardless of the surrounding regions (leader or spacers), thus forming a duplex RNA. Cleavage sites identified by the *in vivo* dRNA-seq analysis are indicated with arrows. The generation of tracrRNA and crRNA processed forms with short overhangs at the 3' ends suggests the involvement of RNase III to dice the RNAs.

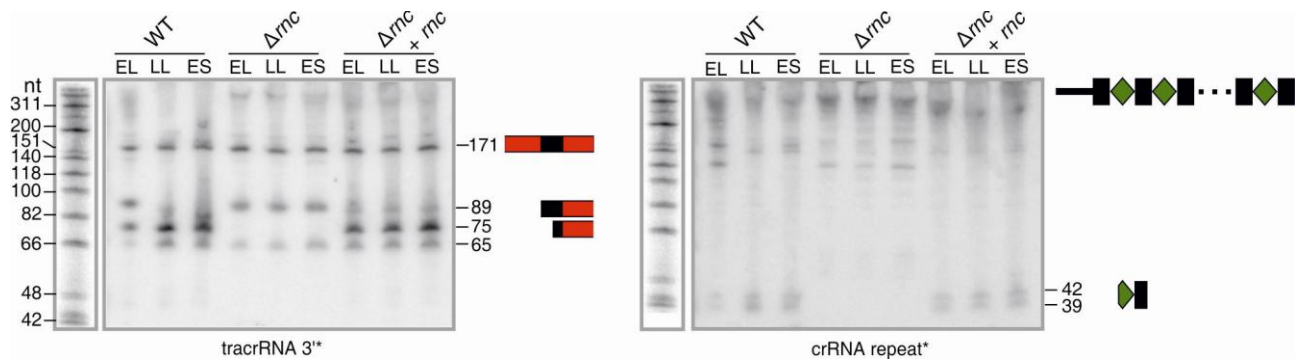

**Supplementary Figure 6 | Role of endogenous RNase III in tracrRNA-mediated maturation of pre-crRNA *in vivo*.** Northern blot analyses of tracrRNA (left panel) and crRNA (right panel) expression in *S. pyogenes* cultures at different time points during growth (refer to Supplementary Fig. 2b). Strains: wild-type (WT) (SF370),  $\Delta rnc$ ,  $\Delta rnc + rnc$  ( $\Delta rnc$  complemented with *rnc*). The gene *rnc* encoding RNase III is the first gene of an operon consisting of *rnc-smc* (*smc*, encoding the SMC protein involved in structural maintenance of chromosome) (RT-PCR analysis, data not shown). Note that the control WTts strain (not shown here, refer to Supplementary Methods) displayed the same phenotype as the WT strain. Probes: tracrRNA 3'\* (OLEC1014) and crRNA repeat\* (OLEC1049). Processing of both tracrRNA into ~75 nt species and pre-crRNA into mature crRNA forms (39-42 nt) is abolished in  $\Delta rnc$ . Complementing  $\Delta rnc$  *in trans* with *rnc* expressed from its own promoter restores the processing events. This indicates that the endogenous RNase III is essential for the maturation of both tracrRNA and pre-crRNA.

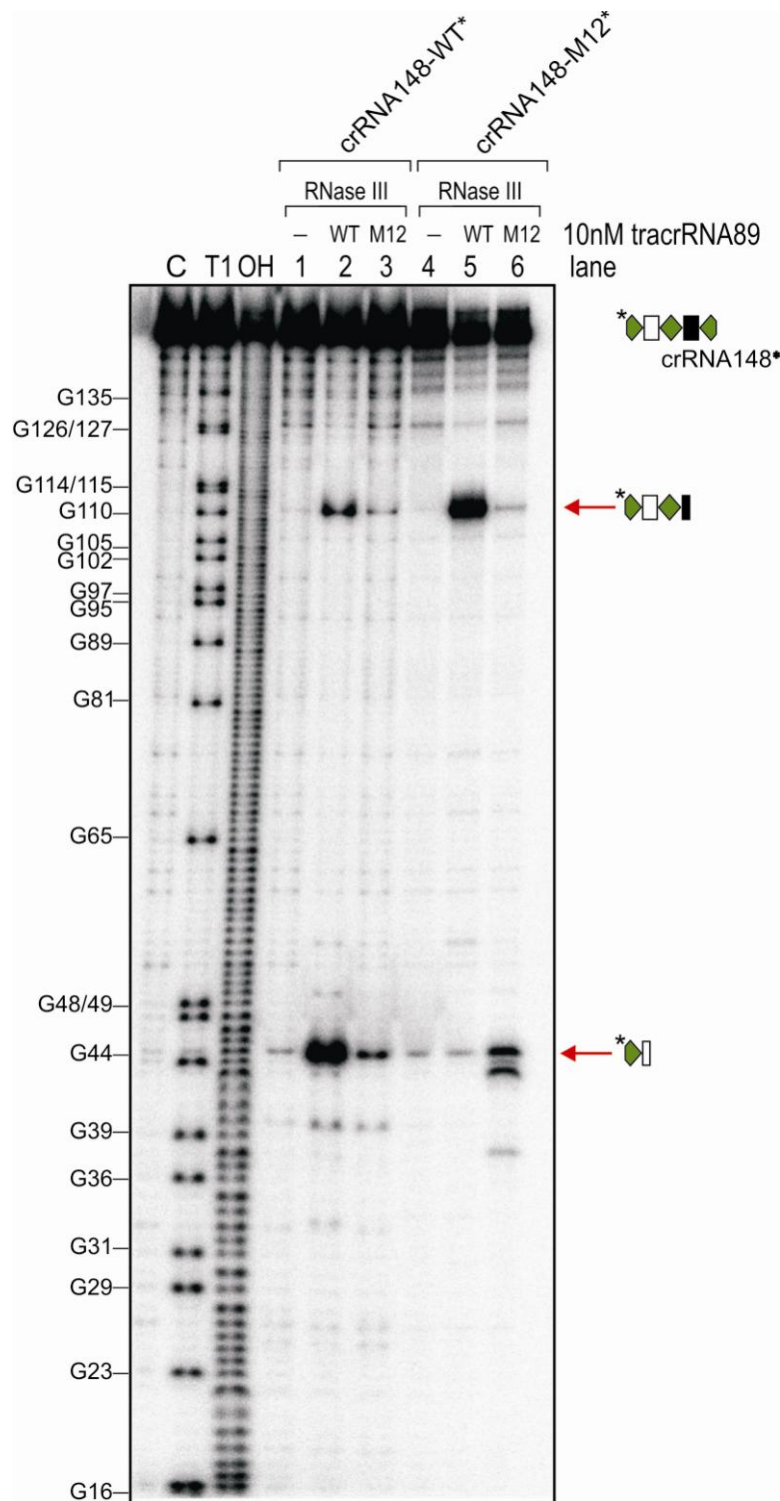

**Supplementary Figure 7 | Compensatory base-pair exchanges confirm tracrRNA-mediated crRNA maturation *in vitro*.** Identification of tracrRNA binding sites on a 148-nt long fragment of pre-crRNA (crRNA148\*). 5' end-labeled crRNA148\* wild-type (WT) or mutated (M12) (~10 nM) was subjected to RNase III cleavage in absence (lanes 1, 4) and presence of cold tracrRNA89 (~10 nM) (WT, lanes 2, 5; compensatory mutations to crRNA148 mutated (M12), lanes 3, 6). A stretch of mutations upstream of the RNase III cleavage site in the first repeat (white box) of crRNA148 (crRNA148-M12; 5'-GCUAUGCUGUUU-3' → 5'-CGAUACGACAAA-3') and cognate compensatory mutations

in *tracrRNA89* (*tracrRNA89*-M12; 5'-AAACAGCAUAGC-3' → 5' UUUGUCGUAUCG-3') were introduced. Lane C: untreated *crRNA148*\*; Lane T1: RNase T1 digest of *crRNA148*\* under denaturing conditions; Lane OH: alkaline ladder. Cleaved G residues are labeled. Vertical bars: *crRNA148* region protected by *tracrRNA89*. Arrows denote specific RNase III cleavages in the two repeat regions of *crRNA148* in the presence of *tracrRNA89*. *tracrRNA89* directs the processing of *crRNA148*. Mutations in *tracrRNA89* hinder *tracrRNA89*-directed cleavage of *crRNA148* (lane 3). The second repeat of *crRNA* in *crRNA148*-M12, which corresponds to the WT repeat, is cleaved upon addition of *tracrRNA* WT (lane 5), whereas the first repeat with the twelve mutated nucleotides is not cleaved anymore. However, cleavage in the mutated first repeat is fully restored when the compensatory *tracrRNA89* and *crRNA148*-M12 are paired (lane 6).

**a**

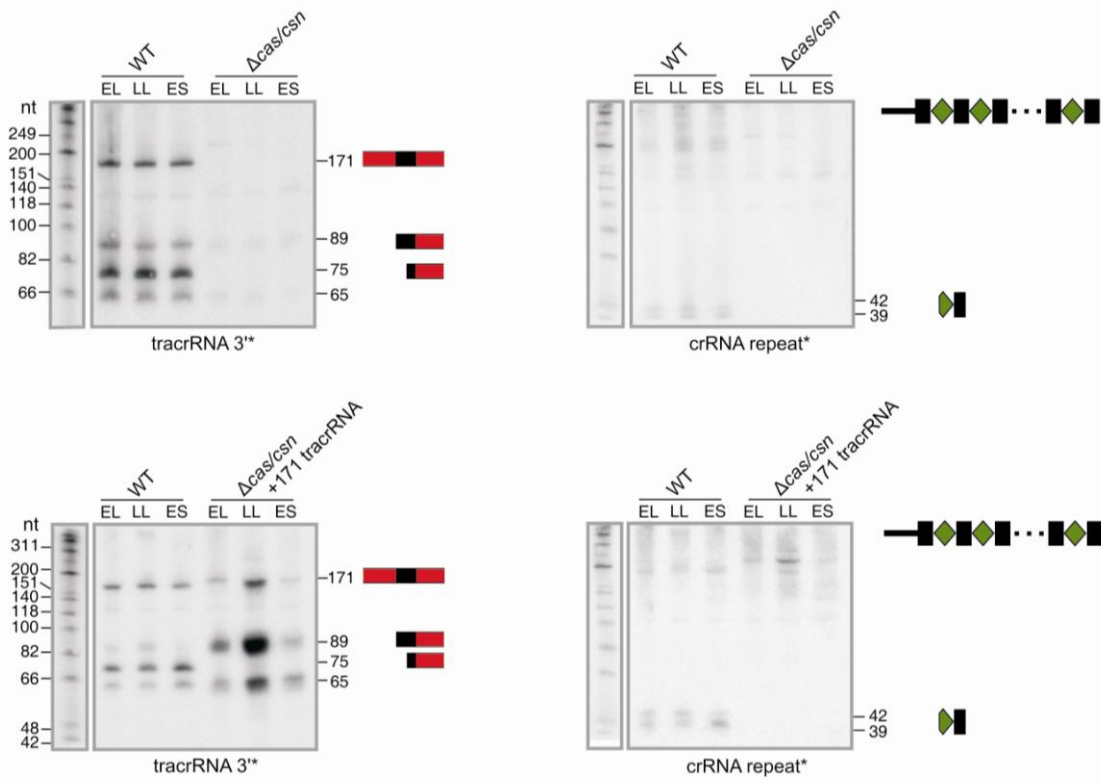

**b**

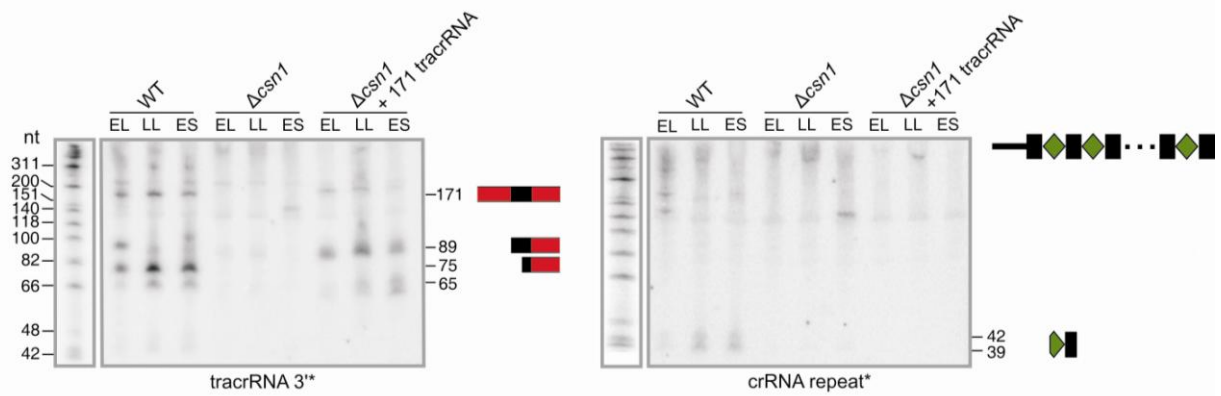



**C**

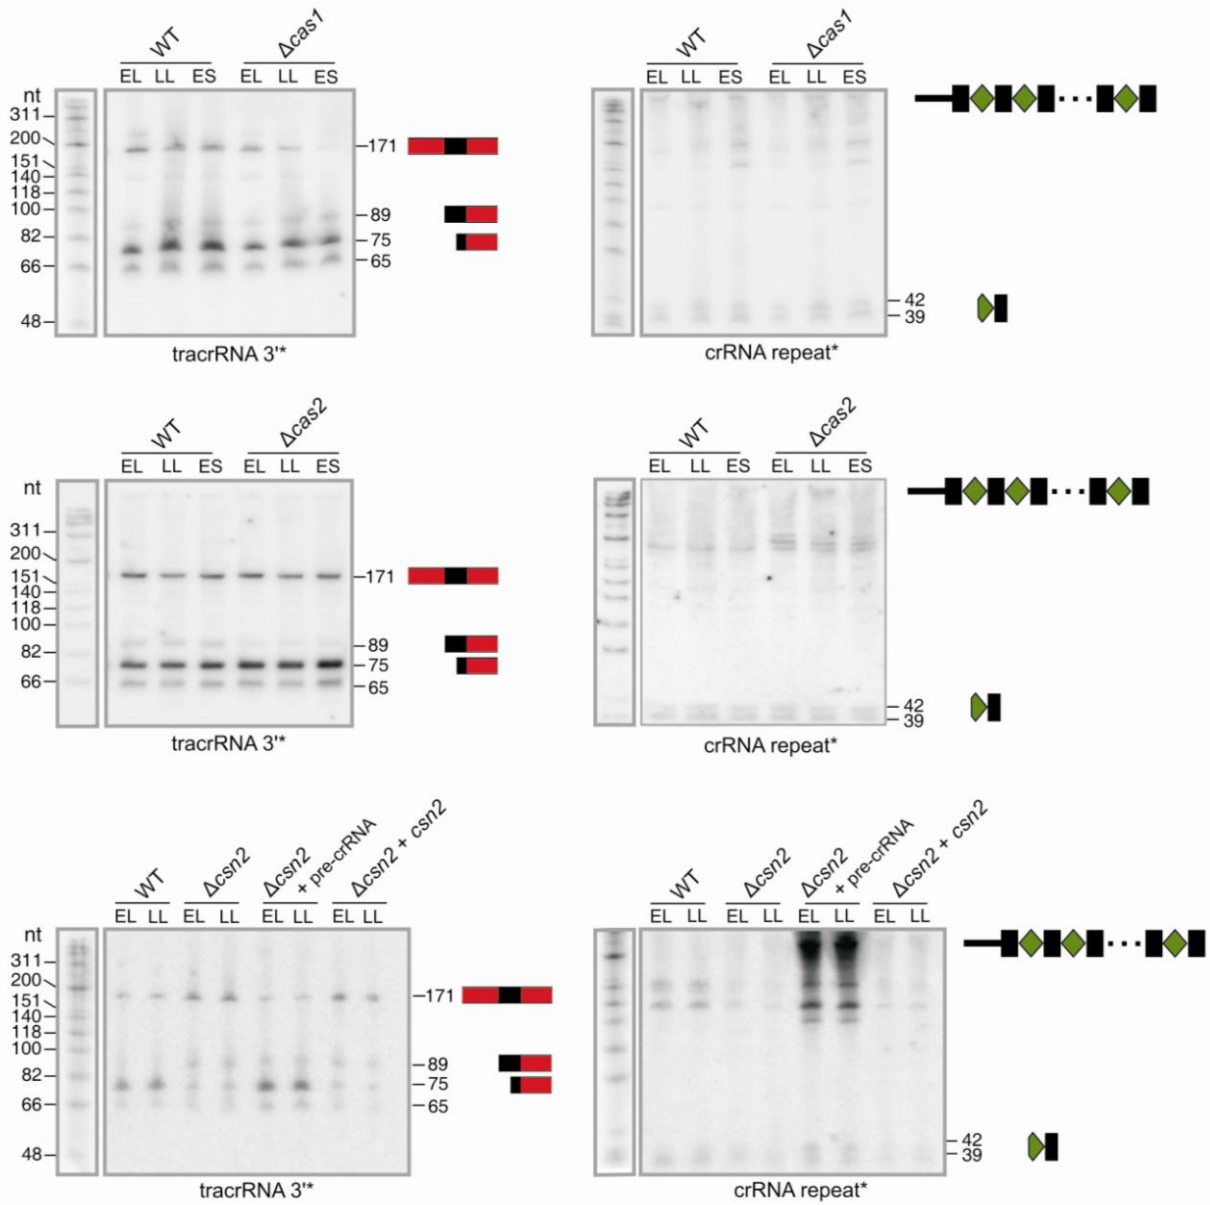

**d**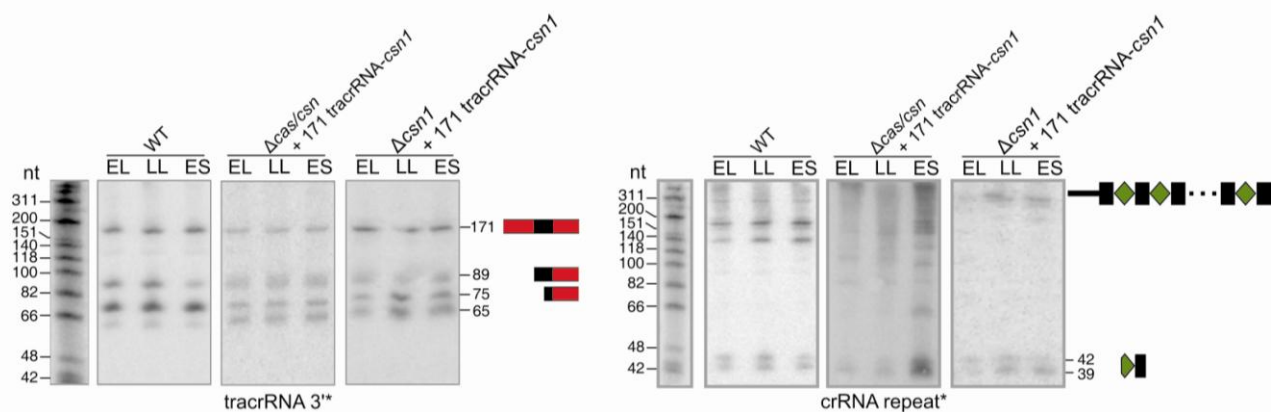

**Supplementary Figure 8 | Role of Cas proteins in the processing of tracrRNA and pre-crRNA *in vivo*.** Northern blot analysis of tracrRNA (left panel) and crRNA (right panel) expression in *S. pyogenes* cultures at different time points during growth (refer to Supplementary Fig. 2b). Strains: wild-type (WT) (SF370),  $\Delta cas/csn$  is  $\Delta csn1-cas1-cas2-csn2$ ,  $\Delta cas/csn + 171$  tracrRNA,  $\Delta cas/csn + 171$  tracrRNA-*csn1*,  $\Delta cas/csn + cas1$ ,  $\Delta cas/csn + cas2$ ,  $\Delta cas/csn + csn2$ ,  $\Delta csn1$ ,  $\Delta csn1 + 171$  tracrRNA,  $\Delta csn1 + 171$  tracrRNA-*csn1*,  $\Delta cas1$ ,  $\Delta cas2$ ,  $\Delta csn2$ ,  $\Delta csn2 +$  pre-crRNA ( $\Delta csn2$  expressing pre-crRNA *in trans*), and  $\Delta csn2 + csn2$ . Complementation with *csn* or *cas* was done with gene expression under the control of the *cas/csn* promoter (*Pcsn1*). The *csn1-cas1-cas2-csn2* genes consist of an operon that is expressed as a single mRNA from a promoter located upstream of *csn1* (*Pcsn1*) (RT-PCR analysis, data not shown). Note that the phenotypes of the control WTts strains (not shown here, refer to Supplementary Methods) were identical to that of the WT strain. Probes: tracrRNA 3'\* (OLEC1014) and crRNA repeat\* (OLEC1049). **a,b**, Csn1 is required for the processing of tracrRNA and pre-crRNA. Compared to WT, processing of both tracrRNA into ~75 nt species and pre-crRNA into mature crRNA forms (39-42 nt) is abrogated in the  $\Delta cas/csn$  (**a**) and  $\Delta csn1$  (**b**). Note that tracrRNA is less abundant in the  $\Delta cas/csn$  (**a**) and  $\Delta csn1$  (**b**) mutants. We argue that Csn1 is likely to be required for binding to and/or stabilization of tracrRNA. To confirm that deletion of *cas/csn* or *csn1* affects the processing events, we introduced *in trans* the 171 nt tracrRNA form in both  $\Delta cas/csn$  (**a**) and  $\Delta csn1$  (**b**) mutants. As expected, northern blot analysis in these strains confirmed the deficiency in RNA processing of the mutants. **c**, Cas1, Cas2 and Csn2 do not seem to be involved in tracrRNA-mediated maturation of pre-crRNA. Processing of both tracrRNA and pre-crRNA is not affected in  $\Delta cas1$ ,  $\Delta cas2$  and  $\Delta csn2$  mutants. Accordingly, complementing the  $\Delta cas/csn$  mutant with *cas1*, *cas2* or *csn2* *in trans* did not rescue the loss-of-function phenotype observed in the mutant. Because expression of pre-crRNA was low in the  $\Delta csn2$  mutant, we complemented  $\Delta csn2$  with *csn2* (pEC307) *in trans* (strain  $\Delta csn2 + csn2$ ) and  $\Delta csn2$  expressing pre-crRNA (pEC299) *in trans* (strain  $\Delta csn2 +$  pre-crRNA). Northern blot analysis of these strains confirms that the RNA processing events are not affected in  $\Delta csn2$ . **d**, In both  $\Delta cas/csn$  and  $\Delta csn1$  mutants, complementation with *csn1* *in trans* restores the processing events.

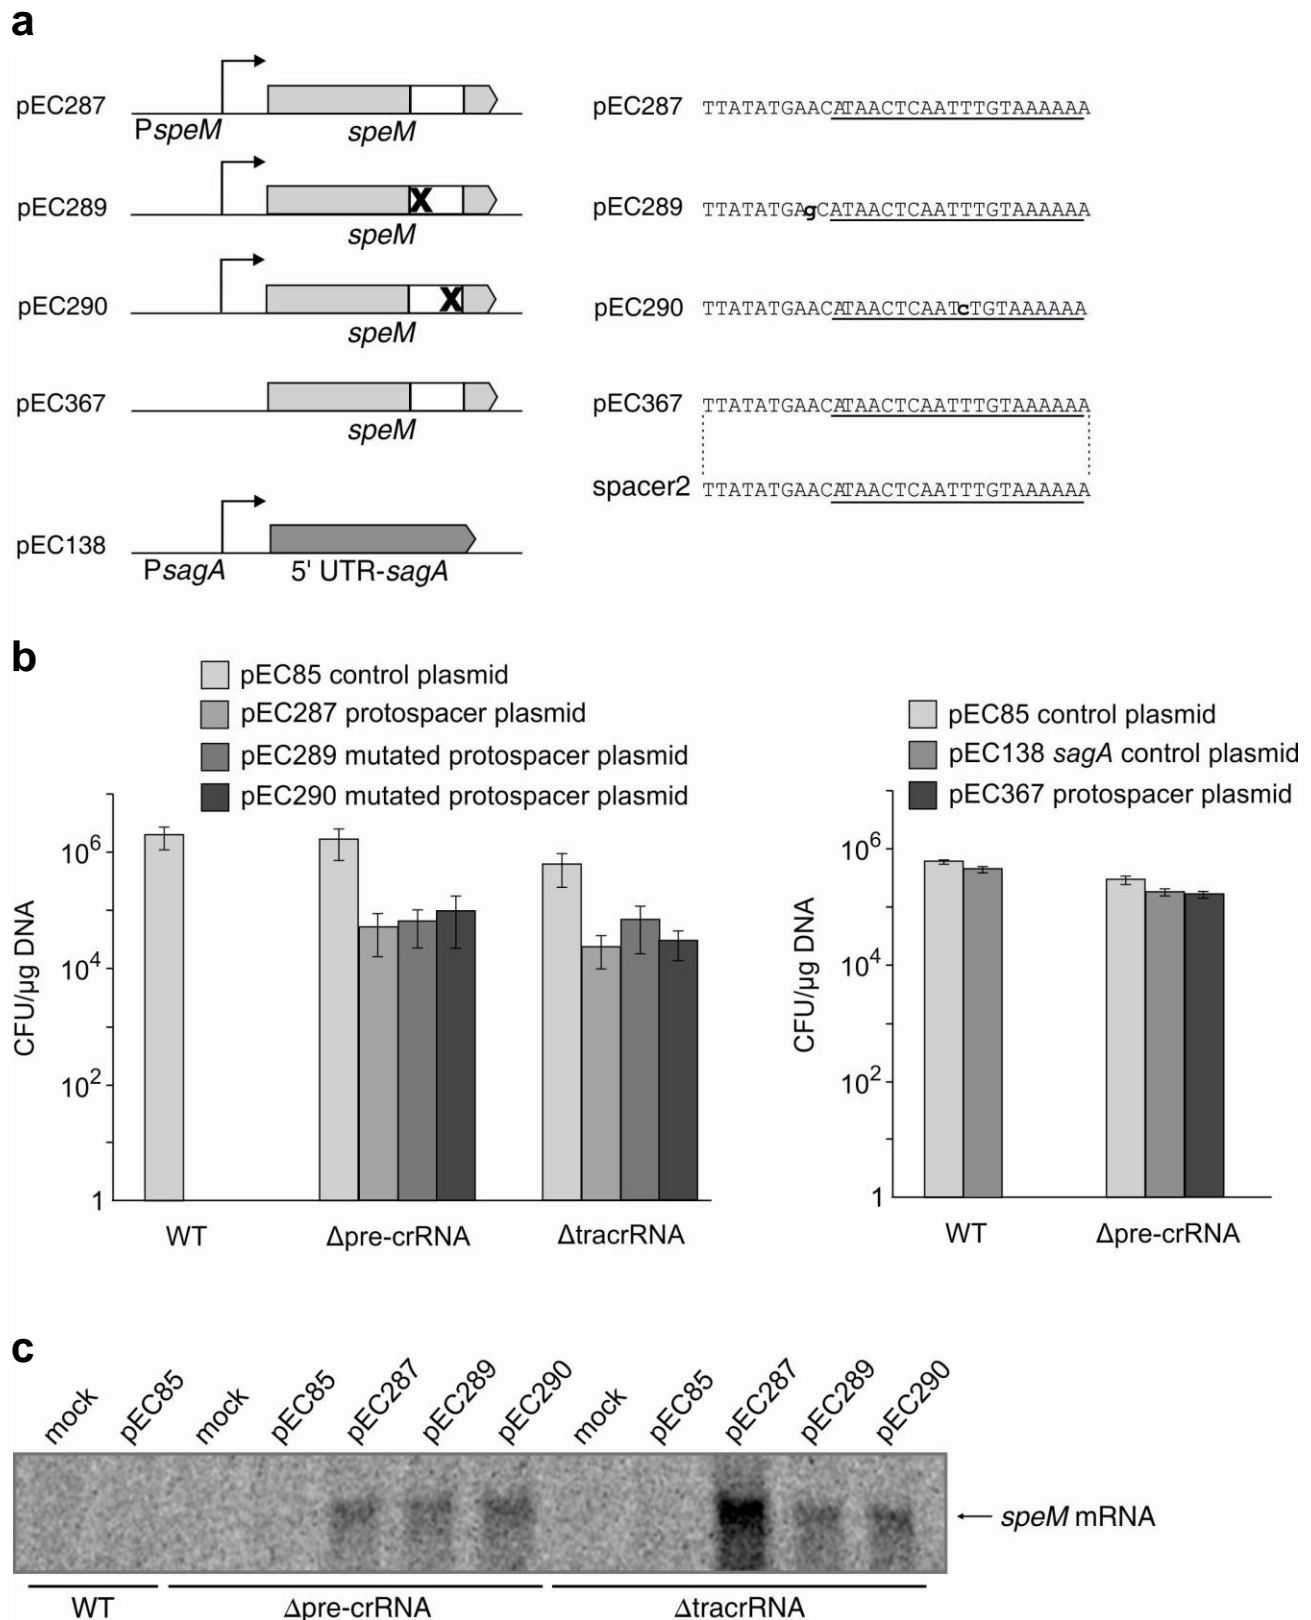

**Supplementary Figure 9 | *tracrRNA*, *pre-crRNA*, RNase III and Csn1 confer immunity against acquisition of a lysogenic phage-protospacer gene.** In *S. pyogenes*, temperate phages are vectors for the horizontal transfer of genes encoding virulence

factors such as the superantigens, phospholipases and streptodornases, which play key roles during *S. pyogenes* infection of humans<sup>1</sup>. Here, we analyzed the role of CRISPR01 in the immunity against acquisition of the protospacer gene, *speM* (encoding superantigen; targeted by spacer 2, Spyo1h\_002 (Supplementary Table 2)). **a**, Plasmids used to transform *S. pyogenes* (Supplementary Table 9). Left panel: *speM*, superantigen-encoding gene (protospacer gene targeted by CRISPR01, source: MGAS8232 (M18)); *sagA*, *PsagA-5'UTRsagA* (not targeted by CRISPR01, acting as negative control); white, protospacer; cross, mutation. Right panel: WT and mutated *speM* protospacer sequences; underlined, sequence corresponding to spacer 2 (*speM*) in processed crRNA; bold lowercases, mutations. **b**, Transformation efficiencies of *S. pyogenes* with protospacer containing plasmids. Left panel: Analysis of mismatch mutations in the protospacer. A mismatch mutation in the 5' end of the protospacer that is not recognized by the mature 42 nt crRNA (pEC289) and a mismatch mutation in the 3' end of the protospacer that is recognized by the mature 42 nt crRNA (pEC290) were analyzed. WT,  $\Delta$ tracrRNA,  $\Delta$ pre-crRNA strains were transformed with pEC289 (pEC85 $\Omega$ P*speM-speM* (A2773G)) or pEC290 (pEC85 $\Omega$ P*speM-speM* (T2785C)). Both plasmids were tolerated by the  $\Delta$ tracrRNA and  $\Delta$ pre-crRNA mutants. Each mutation was not sufficient to abolish immunity of the WT strain to DNA entry. This is consistent with the observation that sequence homology between mobile DNA protospacers and CRISPR01 spacers is not always 100% identical (Supplementary Table 3) and indicates that CRISPR01 evolved to allow plasticity in target recognition. Right panel: Plasmid pEC85 (backbone vector) was used as reference. Note that the transformation efficiencies with pEC287, pEC289, pEC290 and pEC367 were lower than that with pEC85 (left panel and Fig. 5). An additional control, pEC138 (Supplementary Table 9), containing an insert that is not targeted by CRISPR01 but of length similar as that of pEC367, was used. As expected, pEC138 was tolerated by both WT and  $\Delta$ pre-crRNA strains. The transformation efficiency with pEC138 was similar to that with pEC367 and lower than that with pEC85. Thus in our experimental set-up, transformation efficiency seems sensitive to increasing plasmid size. Plasmid pEC367 containing the *speM* gene without its promoter was not tolerated by wild-type (WT) (SF370) but was maintained in the  $\Delta$ pre-crRNA mutant, similarly to pEC287, indicating that protospacer transcription is not required for CRISPR01 interference. Graph bars represent the mean values of colony forming units (CFU) per  $\mu$ g of plasmid DNA. Error bars represent the standard deviation (SD),  $n \geq 3$ . **c**, The *speM* protospacer is expressed in  $\Delta$ tracrRNA and  $\Delta$ pre-crRNA transformed with pEC287. Expression of *speM* in the indicated transformed strains was confirmed by northern blot analysis using a *speM*-specific probe (OLEC1558) (Supplementary Table 10).

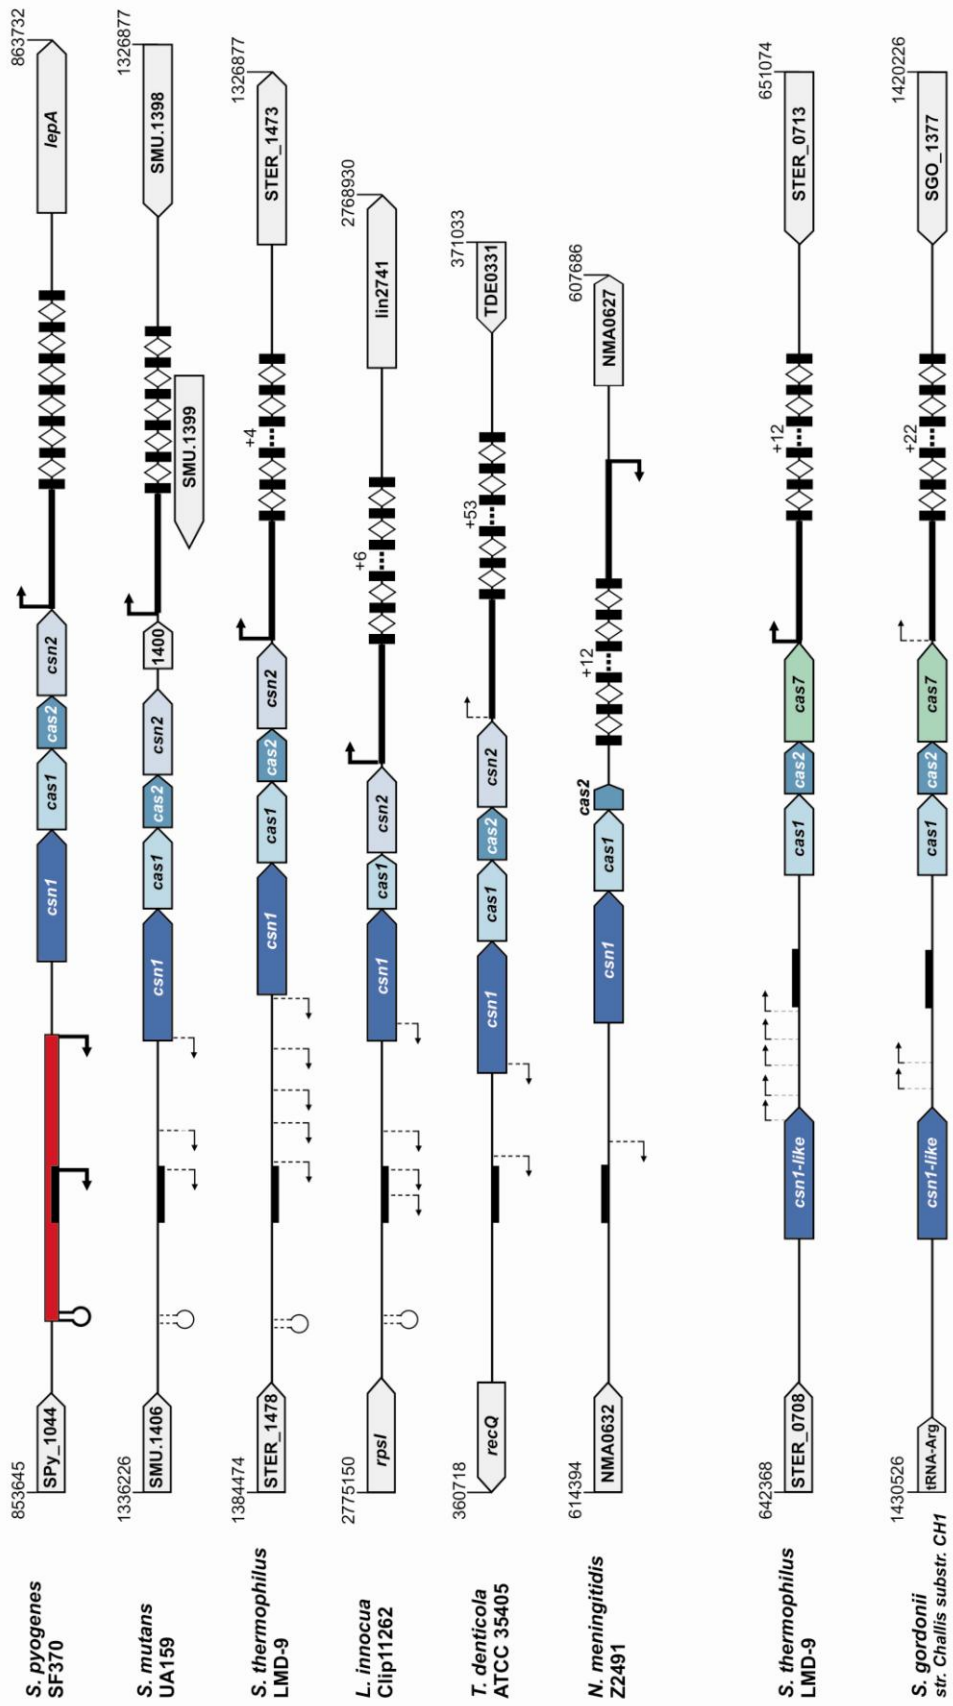

**Supplementary Figure 10 | Genomic organization of type II (Nmeni/CASS4) CRISPR/Cas systems from selected bacterial species.** The type II CRISPR/Cas loci from *L. innocua* Clip11262, *N. meningitidis* Z2491, *S. gordonii* str. *Challis substr.* CH1, *S. mutans* UA159, *S. pyogenes* SF370, *S. thermophilus* LMD-9 and *T. denticola* ATCC 35405 are represented. The DNA region encoding tracrRNA in *S. pyogenes* SF370 is represented in red. The black bar within each tracrRNA represents the sequence complementary to each CRISPR repeat (Supplementary Table 7). The CRISPR-associated genes (*csn1-cas1-cas2-csn2* or *cas7*) are followed by the CRISPR leader sequence and repeat-spacer region. Rectangles, CRISPR repeats; diamonds, CRISPR spacers. A DNA region encoding a putative small RNA (tracrRNA homologue) is found upstream of all represented CRISPR loci. Validated (plain lines) and predicted (dashed lines) transcription start sites and Rho-independent transcription terminators are indicated. Intriguingly, in the *S. thermophilus* LMD-9 (2<sup>nd</sup> CRISPR locus) and *S. gordonii* CH1 genomes, the tracrRNA homologue is located within the *csn1-cas1* intergenic region and transcribed in the same direction as the *cas/csn* operon. Furthermore, in *N. meningitidis*, pre-crRNA is encoded on the opposite strand of the *cas* genes.

```

Spy      (1)  AGUAAUUAAGUAUUGUUUUAUGGCUGAUAAAUUUCUUUGAAUUUCUCCUUGAUUAUUUGUUAUAAAAGUUA
Lin      (1)  -----
Smu      (1)  -----
Sth1     (1)  -----
Nme      (1)  -----
Sth2     (1)  -----UAAUAAUAGUG
    
```

Anti-repeat region

```

Spy      (71)  UAAAAUAAUCUUGUUGGAACCAUUCAAAACAGCAUAGCAAGUUAAAAUAAGGC-----U-----AG
Lin      (1)  -----AUAUUGUUAAGUAUUCAAAUAACAUAAGCAAGUUAAAAUAAGGC-----UUU-----G
Smu      (1)  -----UGUUGGAAUCAUUCGAAACAACACAGCAAGUUAAAAUAAGGCAGUGAUUUUUAUCCAG
Sth1     (1)  -----UUGUGGUUGAAACCAUUCGAAACAACACAGCGAGUUAAAAUAAGGC-----UU-----AG
Nme      (1)  -----CAUAUUGUCGCACUGCGAAAUGAGAACCGUUGCACAAUAAGGCCGUC---UGAAAAGAUGU
Sth2     (12)  UAAGGGACGCCUACACAGUUACUAAAUCUUGCAGAAGCUACAAAGAUAAAGGC-----UU-----CAU
    
```

```

Spy      (127)  UCCGUUAUCAACU-----UGAAA--AAGUG-GCACCAGUUCGGUGCUUUUUU
Lin      (48)  UCCGUUAUCAACU-----UUUAAUUAAGUA-GCGCUGUUUCGGCGUUUUUU
Smu      (60)  UCCGUACACAACU-----UGAAA--AAGUGC-GCACCAGUUCGGUGCUUUUUUA
Sth1     (52)  UCCGUACUCAACU-----UGAAA--AGGUG-GCACCAGUUCGGUGUUUUUUU
Nme      (60)  GCCGCAACGCUCUGCCCUUAAAGCUUCUGCUUUUAAAGGGCAUCGUUAUUUC
Sth2     (71)  GCCGAAAUCAACACCC--UGUCAUUUUUUG-GCAGGGUGUUUUCGUUAUUAA
    
```

STOP

**Supplementary Figure 11 | Alignment of predicted tracrRNA homologues from selected bacterial strains.** Spy, *S. pyogenes* SF370; Lin, *L. innocua* Clip11262, Smu, *S. mutans* UA159; Sth1, *S. thermophilus* LMD-9 1<sup>st</sup> locus; Sth2, *S. thermophilus* LMD-9 2<sup>nd</sup> locus; Nme, *N. meningitidis* Z2491. Putative promoters and transcriptional terminators were predicted bioinformatically. The arrow indicates the transcriptional start site of the 89-nt long tracrRNA form associated with *S. pyogenes* CRISPR01. The lengths of the predicted RNA species correspond to those of tracrRNA homologues observed by northern blot analysis (Supplementary Figs 12-16). Sequences were aligned using AlignX (Invitrogen). Black-highlighted, perfect homology; grey-highlighted, imperfect homology. tracrRNA homologues show limited but significant homology between the examined species. The highest degree of similarity is observed among tracrRNAs of *S. pyogenes*, *S. mutans*, *S. thermophilus* (1<sup>st</sup> CRISPR locus) and *L. innocua*.

**a**

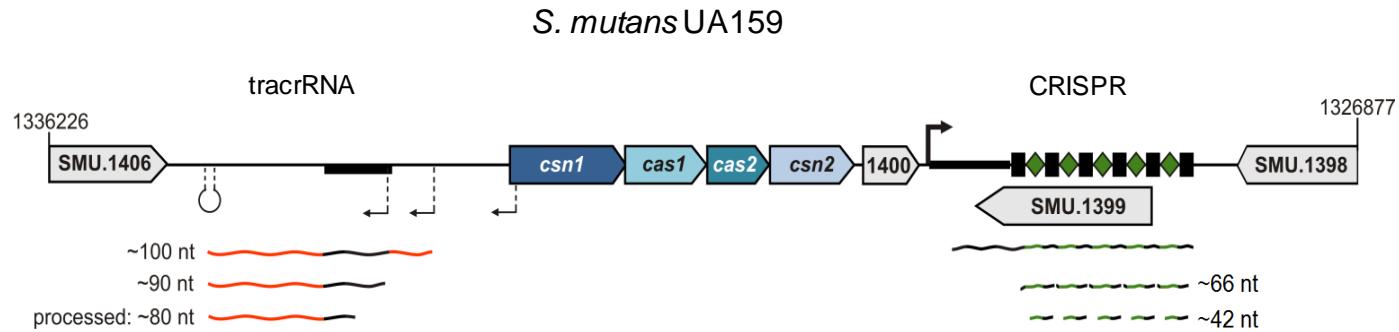

**b**

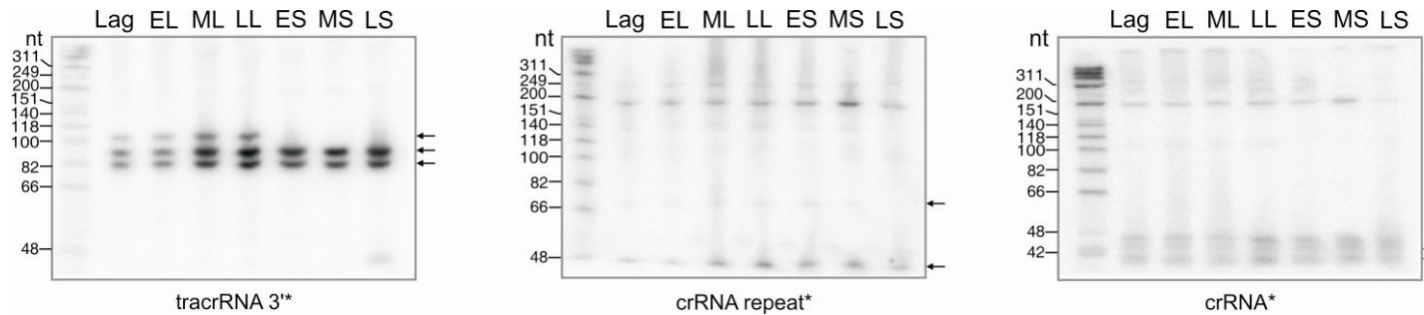

**c**

5' .. GUUUUAG--AGCUGUGUUGUUUCGAAUGGUUCCAAAAC... 3' CRISPR repeat

|||| • |||||||

3' ... AAUUGAACGACACAACAAAGCUUACUAAGGUUGUG... 5' tracrRNA

**Supplementary Figure 12 | tracrRNA homologue and pre-crRNA are expressed and processed in *S. mutans* UA159. a,** Genomic organization of tracrRNA and CRISPR locus (type II, Nmeni/CASS4) in *S. mutans* UA159. The tracrRNA homologue is encoded upstream of the CRISPR-associated genes and on the opposite strand. Putative promoters and Rho-independent



terminator are indicated. The black bar within tracrRNA represents the sequence complementary to each CRISPR repeat. Sizes of tracrRNA species (red-black) correspond to those observed by northern blot analysis. pre-crRNA is encoded downstream of the CRISPR-associated genes. Predicted sizes of CRISPR crRNAs are indicated. Rectangles, CRISPR repeats; diamonds, CRISPR spacers. **b**, Northern blot analysis of total RNA isolated from wild-type (WT) cultures grown to different time points (Refer to Supplementary Fig. 2b). Probes: tracrRNA homologue\* (OLEC1678), crRNA repeat\* (OLEC1679) and crRNA\* (OLEC1680) (Supplementary Table 10). Expression and processing of both tracrRNA homologue and pre-crRNA are observed in *S. mutans*. According to the lengths of detected RNAs and bioinformatic predictions (Supplementary Fig. 11), we suggest that the shortest tracrRNAs result from tracrRNA/pre-crRNA co-processing. **c**, Predicted base-pairing of the CRISPR repeat sequence with the anti-repeat sequence within the tracrRNA homologue is represented.

*S. thermophilus* LMD-9  
1<sup>st</sup> locus

**a**

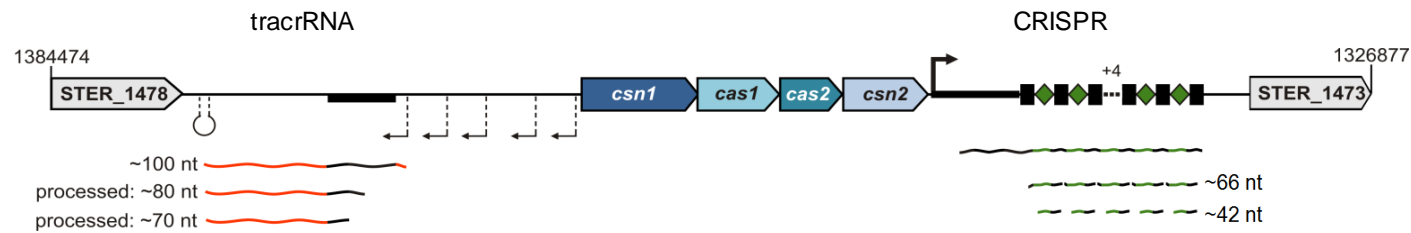

**b**

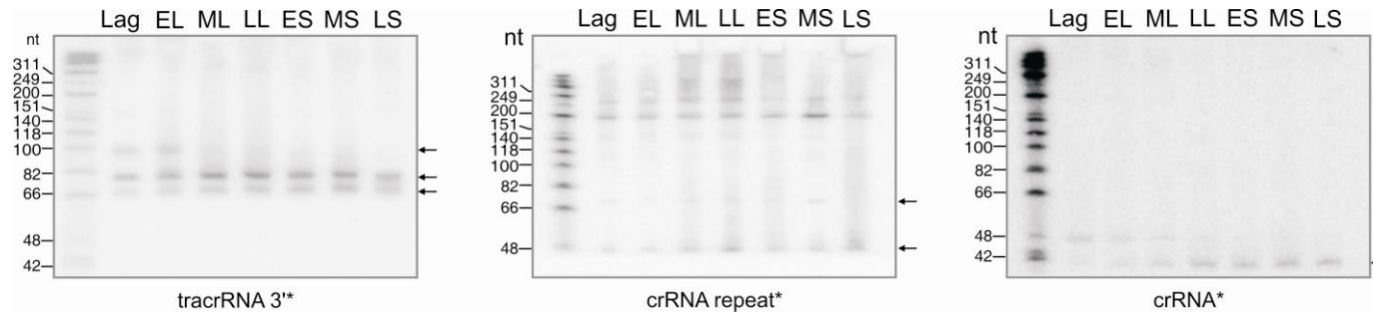

**c**

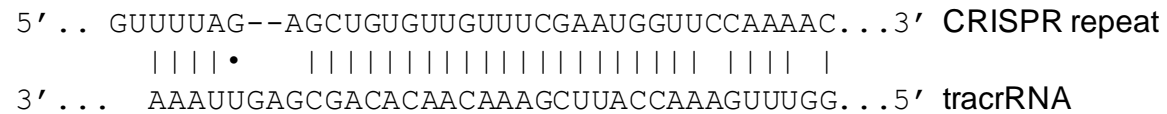

**Supplementary Figure 13 | tracrRNA homologue and pre-crRNA are expressed and processed in *S. thermophilus* LMD-9 (1<sup>st</sup> locus).** Same as Supplementary Fig. 12. Probes: tracrRNA homologue\* (OLEC1672), crRNA repeat\* (OLEC1673) and crRNA\* (OLEC1674) (Supplementary Table 10).



(Supplementary Table 10). Note that for the 2<sup>nd</sup> locus of this strain, the *tracrRNA* homologue is located within the *csn1-cas1* intergenic region. In addition, the *csn2* gene is absent and replaced by the *cas7* gene. In a previous study, *Cas7* was shown to be dispensable for phage resistance and was suggested to be involved in the synthesis and/or insertion of new spacers and additional repeats<sup>2</sup>. Therefore, the absence of *csn2* in this CRISPR-associated gene locus and its replacement by the *cas7* gene, which does not seem to be required for phage resistance, implies that *Csn2* in type II CRISPR/Cas systems does not play a role in the RNA processing.

*L. innocua* Clip11262

**a**

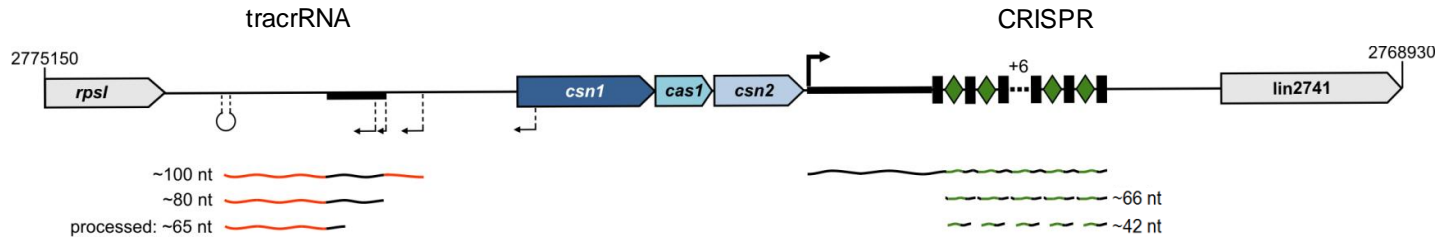

**b**

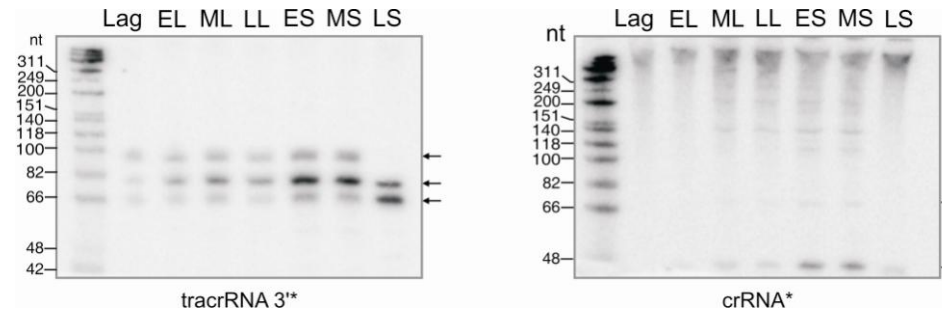

**c**

5' .. GUUUUAG--AGCUAUGUUUUUGAAUGCUAACAAAAC...3' CRISPR repeat  
 |||| • ||||| • |||||  
 3' .....AAUUGAACGAUACAAUAAAACUUAUGAUUGUUUAUA...5' tracrRNA

**Supplementary Figure 15 | tracrRNA homologue and pre-crRNA are expressed and processed in *L. innocua* Clip11262.** Same as Supplementary Fig. 12. Probes: tracrRNA homologue\* (OLEC1675) and crRNA\* (OLEC1677) (Supplementary Table 10).

Note that the *cas2* gene is missing in this CRISPR locus of *L. innocua* Clip11262. Because the mature crRNA species and the putative processed forms of tracrRNA homologue are observed in this strain, we argue that Cas2 in type II CRISPR/Cas systems is unlikely to be involved in the RNA processing.



**Supplementary Figure 16 | tracrRNA homologue and pre-crRNA are expressed and processed in *N. meningitidis* Z2491.** Same as Supplementary Fig. 12. Probes: tracrRNA homologue\* (JVO-4862) and crRNA repeat\* (JVO-4863) (Supplementary Table 10). Note that the *csn2* gene is missing in this CRISPR locus of *N. meningitidis* Z2491. The mature crRNA species and the putative processed forms of tracrRNA homologue are observed in this strain. Therefore, Csn2 in type II CRISPR/Cas systems is unlikely to be involved in the RNA processing. Note that in contrast to the other represented CRISPR loci, pre-crRNA in this locus is transcribed from the opposite strand of the *csn1-cas1-cas2* operon.





downstream of the *cas/csm* operon. Expression and processing of pre-crRNA is observed in *S. epidermidis* RP62a, consistent with a recent study <sup>4</sup>. However, expression of a putative tracrRNA homologue (that would be encoded by the additional repeats) could not be detected (data not shown). Processing of pre-crRNA without expression of a tracrRNA homologue can be explained by the presence of the *cas6* gene in this CRISPR locus. Cas6 of *P. furiosus* was already described to be responsible for processing of pre-crRNA *in vitro* by cleavage within the repeat region <sup>5</sup>. Thus in *S. epidermidis* RP62a, as already suggested in the literature <sup>6,7</sup>, Cas6 would be responsible for processing of the pre-crRNA using a mechanism similar to that described for Cas6 of *P. furiosus*. No *trans*-activating small RNA is required for the maturation process.

## References to Supplementary Figures

1. Vojtek, I. *et al.* Lysogenic transfer of group A Streptococcus superantigen gene among streptococci. *J. Infect. Dis.* 197, 225-234 (2008).
2. Barrangou, R. *et al.* CRISPR provides acquired resistance against viruses in prokaryotes. *Science* 315, 1709-1712 (2007).
3. Marraffini, L. A. & Sontheimer, E. J. CRISPR interference: RNA-directed adaptive immunity in bacteria and archaea. *Nat. Rev. Genet.* 11, 181-190 (2010).
4. Marraffini, L. A. & Sontheimer, E. J. Self versus non-self discrimination during CRISPR RNA-directed immunity. *Nature* 463, 568-571 (2010).
5. Carte, J., Wang, R., Li, H., Terns, R. M. & Terns, M. P. Cas6 is an endoribonuclease that generates guide RNAs for invader defense in prokaryotes. *Genes Dev.* 22, 3489-3496 (2008).
6. Marraffini, L. A. & Sontheimer, E. J. CRISPR interference limits horizontal gene transfer in staphylococci by targeting DNA. *Science* 322, 1843-1845 (2008).
7. van der Oost, J., Jore, M. M., Westra, E. R., Lundgren, M. & Brouns, S. J. CRISPR-based adaptive and heritable immunity in prokaryotes. *Trends Biochem. Sci.* 34, 401-407 (2009).

## Supplementary Tables

### CRISPR RNA maturation by *trans*-encoded small RNA and host factor RNase III

This file contains:

| Table | Title                                                                                                                                                                                      | Page |
|-------|--------------------------------------------------------------------------------------------------------------------------------------------------------------------------------------------|------|
| 1     | Distribution of CRISPR loci in <i>Streptococcus pyogenes</i> clinical isolates with complete genome sequence available                                                                     | 2    |
| 2     | Features of spacer sequences from CRISPR01 present in M1 serotype SF370 and their BLAST candidates                                                                                         | 3    |
| 3     | Features of spacer sequences from CRISPR02 present in M1 serotype SF370 and their BLAST candidates                                                                                         | 4    |
| 4     | Features of spacer sequences from CRISPR01 and CRISPR02 present in <i>S. pyogenes</i> genomes other than the M1 serotype SF370 genome and their best blast candidates (highest identities) | 5    |
| 5     | List of CRISPR-associated genes in <i>S. pyogenes</i> clinical isolates with complete genome sequence available                                                                            | 7    |
| 6     | Differential RNA sequencing (raw) data of intergenic small RNAs expressed in <i>S. pyogenes</i> SF370 SPY- (total) and SPY+ (enriched) libraries                                           | 8    |
| 7     | Basepairings between CRISPR repeats and tracrRNA homologues from various bacterial species                                                                                                 | 12   |
| 8     | Strains used in the study                                                                                                                                                                  | 13   |
| 9     | Plasmids used in the study                                                                                                                                                                 | 15   |
| 10    | Primers used in the study                                                                                                                                                                  | 16   |
|       | References                                                                                                                                                                                 | 22   |

**Supplementary Table 1. Distribution of CRISPR loci in *S. pyogenes* clinical isolates with complete genome sequence available.**

| STRAIN <sup>a</sup> | M TYPE | ACCESSION NUMBER | LOCUS TAG         | PHAGES     | CRISPR01 <sup>b</sup> | CRISPR02 <sup>c</sup> | CRISPR DB <sup>d</sup> | CRISPR SPACER <sup>e</sup> | REPEATS | REFERENCE     |
|---------------------|--------|------------------|-------------------|------------|-----------------------|-----------------------|------------------------|----------------------------|---------|---------------|
| SF370               | M1     | NC_002737        | SPy_xxxx          | Φ370.1-4   | ✓                     |                       | NC_002737_1            | Spyo1h                     | 7       | 1             |
|                     |        |                  |                   |            |                       |                       | NC_002737_4            | Spyo2h                     | 4       |               |
| MGAS5005            | M1     | NC_007297        | M5005_Spy_xxxx    | Φ5005.1-3  | ✓                     |                       | NC_007297_1            | Spyo1e                     | 4       | 2             |
|                     |        |                  |                   |            |                       |                       | NC_007297_4            | Spyo2e                     | 5       |               |
| MGAS10270           | M2     | NC_008022        | MGAS10270_Spyxxxx | Φ10270.1-5 | ✓                     |                       | NC_008022_1            | Spyo1b                     | 3       | 3             |
|                     |        |                  |                   |            |                       |                       | NC_008022_3            | Spyo2b                     | 4       |               |
| MGAS315             | M3     | NC_004070        | SpyM3_xxxx        | Φ315.1-6   |                       |                       | -                      | -                          | -       | 4             |
| SSI-1               | M3     | NC_004606        | SPsxxxx           | ΦSPsP1-6   |                       |                       | -                      | -                          | -       | 5             |
| MGAS10750           | M4     | NC_008024        | MGAS10750_Spyxxxx | Φ10750.1-4 |                       | ✓                     | NC_008024_2            | Spyo2c                     | 6       | 3             |
| Manfredo            | M5     | NC_009332        | SpyM5xxxx         | ΦMan.1-5   |                       |                       | -                      | -                          | -       | 6             |
| MGAS10394           | M6     | NC_006086        | M6_Spyxxxx        | Φ10394.1-6 |                       |                       | -                      | -                          | -       | 7             |
| MGAS2096            | M12    | NC_008023        | MGAS2096_SPyxxxx  | Φ2096.1-2  | ✓                     |                       | -                      | Spyo1d                     | 3       | 3             |
|                     |        |                  |                   |            |                       |                       | NC_008023_2            | Spyo2d                     | 7       |               |
| MGAS9429            | M12    | NC_008021        | MGAS9429_Spyxxxx  | Φ9429.1-3  | ✓                     |                       | -                      | Spyo1g                     | 3       | 3             |
|                     |        |                  |                   |            |                       |                       | NC_008021_2            | Spyo2g                     | 8       |               |
| MGAS8232            | M18    | NC_003485        | spyM18_xxxx       | Φ8232.1-5  |                       |                       | -                      | -                          | -       | 8             |
| ATCC 10782          | M24    | NZ_AEEO00000000  | HMPREF0841_xxxx   | ND         | ND                    | ND                    | -                      | -                          | -       | D. Muzny      |
| MGAS6180            | M28    | NC_007296        | M28_Spyxxxx       | Φ6180.1-4  | ✓                     |                       | NC_007296_2            | Spyo1f                     | 5       | 9             |
|                     |        |                  |                   |            |                       |                       | NC_007296_3            | Spyo2f                     | 2       |               |
| NZ131               | M49    | NC_011375        | Spy49_xxxx        | ΦNZ131.1-3 | ✓                     |                       | NC_011375_1            | -                          | 5       | 10            |
|                     |        |                  |                   |            |                       |                       | NC_011375_3            | -                          | 6       |               |
| M49 591             | M49    | NZ_AAFV00000000  | SpyoM0100xxxx     | ND         | ND                    | ND                    | -                      | -                          | -       | A. Podbielski |

<sup>a</sup> *S. pyogenes* M49 591 and ATCC10782, unfinished sequence, whole genome shotgun sequencing project. Note that MGAS315, SSI-1 and MGAS10750 genomes do not contain the CRISPR01 repeat-spacer array but do contain CRISPR01-associated genes (Refer to Supplementary Fig. 1 and Supplementary Table 5).

<sup>b</sup> CRISPR01 locus belongs to the type II (Nmeni/CASS4) CRISPR/Cas system. CRISPR01 repeat sequences (GTTTTAGAGCTATGCTGTTTTGAATGGTCCCAAAC) are identical in all genomes except MGAS2096 and MGAS9429 genomes. The two latter genomes contain questionable CRISPR01 structures with shorter repeats (AATAATTGGTATAGTCTAATTATA).

<sup>c</sup> CRISPR02 locus belongs to the type I-C (Dvulg/CASS1) CRISPR/Cas system. CRISPR02 repeat sequences (ATTTCATCCACTCACCCATGAAGGGTGAGAC) are identical in all genomes.

<sup>d</sup> Nomenclature is according to the CRISPR database (CRISPR DB) (<http://crispr.u-psud.fr/>).

<sup>e</sup> Nomenclature is according to <sup>11</sup>.

ND, not determined.

Noteworthy, from these data, no clear correlation between the absence or presence of CRISPR loci and the polylysogeny stage of *S. pyogenes* clinical isolates can be assessed. This is exemplified by strain MGAS10270, the genome of which contains both CRISPR01 and CRISPR02 loci but contains also 5 prophages.

**Supplementary Table 2. Features of spacer sequences from CRISPR01 present in M1 serotype SF370 and their BLAST candidates.**

| CRISPR01<br>SPACER <sup>a</sup> | SPACER SEQUENCE                  | BLAST CANDIDATE                        |                                |                   |                                    |
|---------------------------------|----------------------------------|----------------------------------------|--------------------------------|-------------------|------------------------------------|
|                                 |                                  | STRAIN (M type) <sup>b</sup>           | PHAGE                          | GENE <sup>c</sup> | FUNCTION                           |
| Spyo1h_001                      | TGC GCTGGTTGATTTCTTCTTGC GCTTTTT | MGAS315 (M3)                           | Φ315.2                         | SpyM3_0930        | endopeptidase                      |
|                                 |                                  | MGAS315 (M3)                           | Φ315.4                         | SpyM3_1215        | endopeptidase                      |
|                                 |                                  | SSI-1 (M3)                             | ΦSPsP3                         | SPs0647           | endopeptidase                      |
|                                 |                                  | SSI-1 (M3)                             | ΦSPsP5                         | SPs0926           | endopeptidase                      |
|                                 |                                  | NIH1 (M3)                              | ΦNIH1.1                        | NIH1.1_43         | endopeptidase                      |
|                                 |                                  | MGAS10394 (M6)                         | Φ10394.3                       | M6_Spy0994        | endopeptidase                      |
|                                 |                                  | MGAS10394 (M6)                         | Φ10394.6                       | M6_Spy1349        | endopeptidase                      |
|                                 |                                  | MGAS8232 (M18)                         | Φ8232.5                        | spyM18_0769       | endopeptidase                      |
|                                 |                                  | MGAS6180 (M28)                         | Φ6180.2                        | M28_Spy1234       | endopeptidase                      |
|                                 |                                  | <i>S. equi</i> subsp. <i>equi</i> 4047 | ΦP9                            | P9_gp42           | endopeptidase                      |
|                                 |                                  | SF 370 (M1)                            | Φ370.1                         | SPy_0700*         | endopeptidase                      |
|                                 |                                  | MGAS5005(M1)                           | Φ5005.3                        | M5005_Spy1424*    | endopeptidase                      |
|                                 |                                  | MGAS2096 (M12)                         | Φ2096.1                        | MGAS2096_Spy0592* | endopeptidase                      |
|                                 |                                  | MGAS2096 (M12)                         | Φ2096.2                        | MGAS2096_Spy1450* | endopeptidase                      |
|                                 |                                  | MGAS9429 (M12)                         | Φ9429.3                        | MGAS9429_Spy1426* | endopeptidase                      |
| Spyo1h_002                      | TTATATGAACATAACTCAATTTGTA AAAAA  | MGAS8232 (M18)                         | Φ8232.3                        | <i>speM</i>       | superantigen                       |
| Spyo1h_003                      | AGGAATATCCGCAATAATTAATTGCGCTCT   | MGAS10270 (M2)                         | Φ10270.1                       | MGAS10270_Spy0563 | adenine-specific methyltransferase |
|                                 |                                  | MGAS10750 (M4)                         | Φ10750.1                       | MGAS10750_Spy0588 | adenine-specific methyltransferase |
|                                 |                                  | MGAS8232 (M18)                         | Φ8232.5                        | spyM18_0742       | adenine-specific methyltransferase |
| Spyo1h_004                      | AGTGCCGAGGAAAAATTAGGTGCGCTTGGC   | MGAS315 (M3)                           | Φ315.3                         | SpyM3_1101        | hyaluronidase (EC 3.2.1.35)        |
|                                 |                                  | SSI-1 (M3)                             | ΦSPsP4                         | SPs0763           | hyaluronidase (EC 3.2.1.35)        |
|                                 |                                  | MGAS10750 (M4)                         | Φ10750.3                       | MGAS10750_Spy1285 | hyaluronidase (EC 3.2.1.35)        |
|                                 |                                  | MGAS10394 (M6)                         | Φ10394.5                       | M6_Spy1203        | hyaluronidase (EC 3.2.1.35)        |
|                                 |                                  | MGAS9429 (M12)                         | Φ9429.2                        | MGAS9429_Spy0843  | hyaluronidase (EC 3.2.1.35)        |
|                                 |                                  | M49                                    | ΦH4489A                        | <i>hylP</i>       | hyaluronidase (EC 3.2.1.35)        |
|                                 |                                  | MGAS8232 (M18)                         | Φ8232.3                        | spyM18_1254*      | hyaluronidase (EC 3.2.1.35)        |
|                                 |                                  | NZ131 (M49)                            | ΦNZ131.2                       | Spy49_0785*       | hyaluronidase (EC 3.2.1.35)        |
|                                 |                                  | Spyo1h_005                             | TAAATTTGTTTAGCAGGTAAACCGTGCTTT | MGAS10270 (M2)    | Φ10270.1                           |
| MGAS10270 (M2)                  | Φ10270.2                         |                                        |                                | MGAS10270_Spy0804 | phage protein                      |
| MGAS315 (M3)                    | Φ315.2                           |                                        |                                | SpyM3_0965        | phage protein                      |
| MGAS315 (M3)                    | Φ315.5                           |                                        |                                | SpyM3_1347        | phage protein                      |
| SSI-1 (M3)                      | ΦSPsP2                           |                                        |                                | SPs0517           | phage protein                      |
| SSI-1 (M3)                      | ΦSPsP5                           |                                        |                                | SPs0888           | phage protein                      |
| MGAS10750 (M4)                  | Φ10750.2                         |                                        |                                | MGAS10750_Spy0839 | phage protein                      |
| NZ131 (M49)                     | ΦNZ131.3                         |                                        |                                | Spy49_1511c       | phage protein                      |
| Spyo1h_006                      | TTCAGCACACTGAGACTTGTGAGTTCCAT    |                                        |                                | -                 | -                                  |

<sup>a</sup> Spacer code is according to <sup>11</sup>.<sup>b</sup> All strains refer to *S. pyogenes* except for the indicated *S. equi*.<sup>c</sup> ND, no data available.

All spacers have 100% sequence identity to known prophage-encoded genes (exception for Spyo1h\_001 and Spyo1h\_004 that anneal with 1 mismatch to the indicated genes with an asterisk\*). Only the Spyo1h\_006 spacer did not show any sequence similarity with sequences in the NCBI database. Sequences of spacers Spyo1h\_001, Spyo1h\_003, Spyo1h\_004 and Spyo1h\_005 anneal to the coding strands of the respective genes. Sequence of spacer Spyo1h\_002 anneals perfectly to the non-coding strand of superantigen SpeM-encoding gene. One spacer (Spyo1h\_001) anneals with one mismatch to the endogenous prophage gene, SpY\_0700. Note the presence of spacers that are specific to *S. equi* genomes. This suggests that transfer of phages between the human pathogen *S. pyogenes* and the animal pathogen *S. equi* might have occurred either directly or indirectly via other streptococcal species <sup>12</sup>.

**Supplementary Table 3. Features of spacer sequences from CRISPR02 present in M1 serotype SF370 and their BLAST candidates.**

| CRISPR02 SPACER <sup>a</sup> | SPACER SEQUENCE                    | BLAST CANDIDATE                 |          |                   |                       |                                    |
|------------------------------|------------------------------------|---------------------------------|----------|-------------------|-----------------------|------------------------------------|
|                              |                                    | STRAIN (M type) <sup>b</sup>    | PHAGE    | GENE              | FUNCTION <sup>c</sup> | ALIGNMENT <sup>d</sup>             |
| Spyo2h_001                   | AAAAAGCATATCAGAAAATCACCAATTACATCAG | MGAS10270 (M2)                  | Φ10270.1 | MGAS10270_Spy0562 | methyltransferase     | AAAAAGCATATCAGAAAATCACCAATTACATCAG |
|                              |                                    | MGAS10750 (M4)                  | Φ10750.1 | MGAS10750_Spy0587 | methyltransferase     | AAAAAGCATATCAGAAAATCACCAATTACATCAG |
|                              |                                    | Manfredo (M5)                   | ΦMan.4   | SpyM51298         | methyltransferase     | AAAAAGCATATCAGAAAATCACCAATTACATCAG |
|                              |                                    | MGAS8232 (M18)                  | Φ8232.2  | spyM18_0741       | methyltransferase     | AAAAAGCATATCAGAAAATCACCAATTACATCAG |
|                              |                                    | MGAS315 (M3)                    | Φ315.2   | SpyM3_0953        | methyltransferase     | AAAAAGCATATCAGAAAATCACCAATTACATCAG |
|                              |                                    | SSI-1 (M3)                      | ΦSPsP5   | SPs0903           | methyltransferase     | AAAAAGCATATCAGAAAATCACCAATTACATCAG |
|                              |                                    | NZ131 (M49)                     | ΦNZ131.3 | Spy49_1494c       | methyltransferase     | AAAAAGCATATCAGAAAATCACCAATTACATCAG |
| Spyo2h_002                   | AAGTCATTTTCTGCTTCTGCTAGGTTTGCTTTA  | <i>S. equi subsp. equi</i> 4047 | ΦSeq2    | SEQ_0825          | Φ capsid protein      | AAGTCATTTTCTGCTTCTGCTAGGTTTGCTTTA  |
|                              |                                    | MGAS10394 (M6)                  | Φ10394.3 | M6_Spy1006        | Φ capsid protein      | AAGTCATTTTCTGCTTCTGCTAGGTTTGCTTTA  |
|                              |                                    | MGAS315 (M3)                    | Φ315.2   | SpyM3_0941        | Φ capsid protein      | AAGTCATTTTCTGCTTCTGCTAGGTTTGCTTTA  |
|                              |                                    | SSI-1 (M3)                      | ΦSPsP5   | SPs0914           | Φ capsid protein      | AAGTCATTTTCTGCTTCTGCTAGGTTTGCTTTA  |
| Spyo2h_003                   | TTTTTACTTTGATTACATCCGCAATGTCACAGC  | MGAS10270 (M2)                  | Φ10270.3 | MGAS10270_Spy1333 | Φ HP                  | TTTTTACTTTGATTACATCCGCAATGTCACAGC  |
|                              |                                    | MGAS10270 (M2)                  | Φ10270.2 | MGAS10270_Spy0821 | Φ HP                  | TTTTTACTTTGATTACATCCGCAATGTCACAGC  |
|                              |                                    | MGAS315 (M3)                    | Φ315.4   | SpyM3_1239        | Φ HP                  | TTTTTACTTTGATTACATCCGCAATGTCACAGC  |
|                              |                                    | NIH1 (M3)                       | ΦNIH1.1  | ND                | ND                    | TTTTTACTTTGATTACATCCGCAATGTCACAGC  |
|                              |                                    | MGAS10750 (M4)                  | Φ10750.2 | MGAS10750_Spy0857 | Φ HP                  | TTTTTACTTTGATTACATCCGCAATGTCACAGC  |
|                              |                                    | Manfredo (M5)                   | ΦMan.1   | SpyM50500         | Φ HP                  | TTTTTACTTTGATTACATCCGCAATGTCACAGC  |
|                              |                                    | MGAS6180 (M28)                  | Φ6180.2  | M28_Spy1257       | Φ HP                  | TTTTTACTTTGATTACATCCGCAATGTCACAGC  |

<sup>a</sup> Spacer code is according to <sup>11</sup>.<sup>b</sup> All strains refer to *S. pyogenes* except for the indicated *S. equi*.<sup>c</sup> ND, no data available.<sup>d</sup> All spacers have imperfect sequence identity to known prophage-encoded genes. Sequences of spacers anneal to the coding strands of the respective genes. Mismatches with respect to spacer sequence are highlighted in black boxes. Blast candidates are ranked according to the increasing number of mismatches in similarities to the consensus spacer sequence.

**Supplementary Table 4. Features of spacer sequences from CRISPR01 and CRISPR02 present in *S. pyogenes* genomes other than the M1 serotype SF370 genome and their best BLAST candidates (highest identities).**

| STRAIN<br>(M type) | CRISPR<br>SPACER <sup>a</sup>     | SPACER SEQUENCE                                                                                                                                                                             | BLAST CANDIDATE <sup>b</sup>                                                                                                                                                                                                                                | % IDENTITY |
|--------------------|-----------------------------------|---------------------------------------------------------------------------------------------------------------------------------------------------------------------------------------------|-------------------------------------------------------------------------------------------------------------------------------------------------------------------------------------------------------------------------------------------------------------|------------|
| MGAS5005<br>(M1)   | Spyo1e_001                        | GGGTGGTTGGCTGACGCATCGCAATATTAA                                                                                                                                                              | SPy_0701; MGAS10270_Spy0590; MGAS10270_Spy1310; SPs0648; SpyM3_0929; SpyM3_1214; MGAS10750_Spy0615; SpyM50524; SpyM51031; SpyM51271; M6_Spy1550; MGAS9429_Spy0586; spyM18_0770; HylP1, <i>Streptococcus</i> phage P9; HylP, <i>Streptococcus</i> phage NIH1 | 100        |
|                    | Spyo1e_002                        | AGGAATATCCGCAATAATTAATTCGCCTCT                                                                                                                                                              | MGAS10270_Spy0563; MGAS10750_Spy0588; SpyM18_0742                                                                                                                                                                                                           | 100        |
|                    | Spyo1e_003                        | TAAATTTGTTTACGAGGTAACCCGTGCTTT                                                                                                                                                              | MGAS10270_Spy0546; MGAS10270_Spy0804; SPs0517; SPs0888; SpyM3_0965; SpyM3_1347; MGAS10750_Spy0839; Spy49_1511c                                                                                                                                              | 100        |
|                    | Spyo2e_001                        | AAAAAGCATATCACGAAAATCACCAATTACATCAG                                                                                                                                                         | MGAS10270_Spy0562; MGAS10750_Spy0587; SpyM51298; spyM18_0741                                                                                                                                                                                                | 97         |
|                    | Spyo2e_002                        | AAGTCATTTCTGCTTCTGCTAGGTTTGCTTTA                                                                                                                                                            | M6_Spy1006; (SEQ_0825: 100%)                                                                                                                                                                                                                                | 93         |
|                    | Spyo2e_003                        | TTTTTACTTTGATTACATCCCGCAATGTCACAGC                                                                                                                                                          | MGAS10270_Spy0821; MGAS10270_Spy1333; SpyM3_1239; MGAS10750_Spy0857; SpyM50500; M28_Spy1257                                                                                                                                                                 | 94         |
| MGAS10270<br>(M2)  | Spyo2e_004                        | TGTCCGCATACCTTGATTGAGCGAGTAAACTC                                                                                                                                                            | SpyM51030                                                                                                                                                                                                                                                   | 100        |
|                    | Spyo1b_001                        | AAGCCAAACGCTAGGTTTAACCGATGTTGT                                                                                                                                                              | spyM18_1292; SAK_0616; M28_Spy1015                                                                                                                                                                                                                          | 100        |
|                    | Spyo1b_002                        | TAAAAAACTCATACTAAAAAATAGATTA                                                                                                                                                                | SPy_0701; SPy_1445; SpyM3_1101; SpyM3_1214; SPs0648; SPs0763; MGAS10750_Spy1285; SpyM50680; SpyM51031; M6_Spy1203; spyM18_1455; hylP Bacteriophage H4489A; hylP2; SEQ_2045                                                                                  | 100        |
|                    | Spyo2b_001                        | CTGCATGATACCCTGTTCCACATCATGTTAGC                                                                                                                                                            | SPy_1460; M5005_Spy_1189; SpyM3_1115; SPs0749; MGAS10750_Spy1299; SpyM50666; M6_Spy1217; spyM18_1474; SAG0585; SAK_0635; (SDEG_1129, 100%)                                                                                                                  | 93         |
|                    | Spyo2b_002                        | AATAGAGAAAAACTATATGAATACAAAGTCTATG                                                                                                                                                          | spyM18_0718; SpyM51320                                                                                                                                                                                                                                      | 100        |
|                    | Spyo2b_003                        | ACCTCTCATAATATCTTTAAGTTCCTTACCTCAC                                                                                                                                                          | SpyM3_0729; SPs1123; SEQ_2041; spyM18_0389                                                                                                                                                                                                                  | 100        |
| MGAS10750<br>(M4)  | Spyo2c_001                        | TACTAGCGTTGAGATAGCCGGTATTAATCTTACC                                                                                                                                                          | SpyM50681                                                                                                                                                                                                                                                   | 73         |
|                    | Spyo2c_002                        | ATTTTCGTACCTCCTCAATCAATAATAGAGTCA                                                                                                                                                           |                                                                                                                                                                                                                                                             |            |
|                    | Spyo2c_003                        | CTAAGATGATACCAGTTACAATACCATTAAAGC                                                                                                                                                           | spyM18_1491; (MGAS10750_Spy1310, 80%)                                                                                                                                                                                                                       | 100        |
|                    | Spyo2c_004                        | AAATAATTACATGACTAGCCAATACACCCACATA                                                                                                                                                          | SpyM50471; SpyM3_1354; SPs0507; spyM18_1808; SDEG_1665                                                                                                                                                                                                      | 100        |
|                    | Spyo2c_005                        | TTCATGAGCTTCTTTACTCTCAAAGTAAGATG                                                                                                                                                            | SPy_1475 (MGAS10750_Spy1314, 93%)                                                                                                                                                                                                                           | 100        |
| MGAS2096<br>(M12)  | Spyo1d_001                        | GATTGACCACAACATCCAACGCTTAGGTTAT                                                                                                                                                             | SPy_1460, M5005_Spy1189; SpyM3_1115; SPs0749; SpyM50666; MGAS10750_Spy1299; M6_Spy1217; spyM18_1474; (SDEG_1129, 100%)                                                                                                                                      | 96         |
|                    | Spyo1d_002                        | AATAGAGTAGACAAAAAATTGAGTTTGAC                                                                                                                                                               | SPs0927; M6_Spy1348; spyM18_1254; spyM18_1757; HylP, <i>Streptococcus</i> phage P9; SEQ_2045                                                                                                                                                                | 100        |
|                    | Spyo2d_001                        | ATCGATTTTGCAGATAAAAGGAAACATAGAGTTC                                                                                                                                                          | SpyM3_0710; SPs1142; spyM18_0369                                                                                                                                                                                                                            | 100        |
|                    | Spyo2d_002                        | AATTTTCATCTCCTGCATCTTGATCAGTTAGGGTTAC                                                                                                                                                       | SpyM3_0702; SPs1150; spyM18_0361; <i>Streptococcus</i> phage phi3396                                                                                                                                                                                        | 100        |
|                    | Spyo2d_003                        | AGATTCGGCTAGATATTCTAAAAATCGATAAAGC                                                                                                                                                          | SpyM51029                                                                                                                                                                                                                                                   | 94         |
|                    | Spyo2d_004                        | TCCAACCTTTGTAAAAGTAGAATTTGCTACGTTTG                                                                                                                                                         | SpyM51321; spyM18_0717                                                                                                                                                                                                                                      | 100        |
|                    | Spyo2d_005                        | ATTATTTTATAAAGTTATCACGTAATTTTGCAA                                                                                                                                                           | M5005_Spy_1029; SPs0902; SpyM50494; spyM18_1789; M28_Spy1005                                                                                                                                                                                                | 100        |
| Spyo2d_006         | CATTATATGAACAATGCCTTTGCGGAATTAGTT | SPy_0008; M5005_Spy_0006; MGAS10270_Spy0006; SpyM3_0006; SPs0006; SpyM50006; MGAS10750_Spy0006; M6_Spy0006; MGAS2096_Spy0006; MGAS9429_Spy0006; M28_Spy0006; Spy49_0006; (spyM18_0007, 93%) | 96                                                                                                                                                                                                                                                          |            |
| MGAS9429<br>(M12)  | Spyo1g_001                        | GATTGACCACAACATCCAACGCTTAGGTTAT                                                                                                                                                             | SPy_1460, M5005_Spy_1189; SpyM3_1115; SPs0749; SpyM50666; MGAS10750_Spy1299; M6_Spy1217; spyM18_1474; (SDEG_1129, 100%)                                                                                                                                     | 96         |
|                    | Spyo1g_002                        | AATAGAGTAGACAAAAAATTGAGTTTGAC                                                                                                                                                               | SPs0927; M6_Spy1348; spyM18_1254; spyM18_1757; HylP, <i>Streptococcus</i> phage P9; SEQ_2045                                                                                                                                                                | 100        |
|                    | Spyo2g_001                        | ATCGATTTTGCAGATAAAAGGAAACATAGAGTTC                                                                                                                                                          | SpyM3_0710; SPs1142; spyM18_0369                                                                                                                                                                                                                            | 100        |
|                    | Spyo2g_002                        | AATTTTCATCTCCTGCATCTTGATCAGTTAGGGTTAC                                                                                                                                                       | SpyM3_0702; SPs1150; spyM18_0361; <i>Streptococcus</i> phage phi3396                                                                                                                                                                                        | 100        |
|                    | Spyo2g_003                        | ATGAAGTGGACATATTGAACATGATTTCTGGCCAAT                                                                                                                                                        | M5005_Spy_1220                                                                                                                                                                                                                                              | 100        |
|                    | Spyo2g_004                        | AGATTCGGCTAGATATTCTAAAAATCGATAAAGC                                                                                                                                                          | SpyM51029                                                                                                                                                                                                                                                   | 94         |
|                    | Spyo2g_005                        | TCCAACCTTTGTAAAAGTAGAATTTGCTACGTTTG                                                                                                                                                         | SpyM51321; spyM18_0717                                                                                                                                                                                                                                      | 100        |
| Spyo2g_006         | ATTATTTTATAAAGTTATCACGTAATTTTGCAA | M5005_Spy1029; SPs0902; SpyM50494; spyM18_1789; M28_Spy1005                                                                                                                                 | 100                                                                                                                                                                                                                                                         |            |
| Spyo2g_007         | CATTATATGAACAATGCCTTTGCGGAATTAGTT | SPy_0008; M5005_Spy_0006; MGAS10270_Spy0006; SpyM3_0006; SPs0006; SpyM50006; MGAS10750_Spy0006; M6_Spy0006; MGAS2096_Spy0006; MGAS9429_Spy0006; M28_Spy0006; Spy49_0006; (spyM18_0007, 93%) | 96                                                                                                                                                                                                                                                          |            |
| MGAS6180<br>(M28)  | Spyo1f_001                        | TGCTCCAGATGGATTTTTAACTGATTATT                                                                                                                                                               |                                                                                                                                                                                                                                                             |            |
|                    | Spyo1f_002                        | TAGAAATTGACAATGCTTTTCTTTTGTCT                                                                                                                                                               | SPy_0986; MGAS9429_Spy0833                                                                                                                                                                                                                                  | 100        |
|                    | Spyo1f_003                        | AATAGAGCTAGACAAAAAATTGAGTTTGAC                                                                                                                                                              | SPs0927; M6_Spy1348; spyM18_1254; spyM18_1757; HylP, <i>Streptococcus</i> phage P9; SEQ_2045                                                                                                                                                                | 100        |



| STRAIN<br>(M type) | CRISPR<br>SPACER <sup>a</sup>      | SPACER SEQUENCE                     | BLAST CANDIDATE <sup>b</sup>                                                                                           | % IDENTITY |
|--------------------|------------------------------------|-------------------------------------|------------------------------------------------------------------------------------------------------------------------|------------|
| NZ131<br>(M49)     | Spyo1f_004                         | GACATATTAACGTCCTTTCTCCTGCTTTCC      | SPy_1459; M5005_Spy1188; SpyM3_1114; SPs0750; MGAS10750_Spy1298; M6_Spy1216; spyM18_1472; SDEG_1128, SAG0586; SAK_0636 | 100        |
|                    | Spyo2f_001                         | AAATAATTACATGACTAGCCAATACACCCACATA  | SpyM50471; SpyM3_1354; SPs0507; spyM18_1808; SDEG_1665                                                                 | 100        |
|                    | Spyo1a_001                         | AGCTGCATCGCTGTAGTATTTACCAATATA      | SPy_1464; M5005_Spy1193; SpyM3_1120; SPs0744; MGAS10750_Spy1302; SpyM50661; M6_Spy1222; spyM18_1480                    | 100        |
|                    | Spyo1a_002                         | ACTGGGAAATTGATAAAATCGGCAATGCCCG     | SPy_0700; SpyM3_1215; SpyM50523; M6_Spy1349; MGAS2096_Spy0592; spyM18_0769, M28_Spy1234                                | 100        |
|                    | Spyo1a_003                         | CAAGTTGTTTAAATCGAAGAATTTCCCGTTG     | SpyM3_1234; SPs0627; spyM18_1782; M28_Spy1253                                                                          | 100        |
|                    | Spyo1a_004                         | GTGCCTGTGGAGGAATTGATGAACATGCCT      | Spy49_1465c                                                                                                            | 90         |
|                    | Spyo2a_001                         | AATCAATCGCGCTTTTTGTGCGATTATAAGGGA   | M6_Spy1550; HyIP, <i>Streptococcus</i> phage P9                                                                        | 100        |
|                    | Spy02a_002                         | TCCATTTTTTACTTTCTCATGTGGCAAACATAAT  | SpyM50535; M6_Spy1540                                                                                                  | 100        |
|                    | Spy02a_003                         | CGCTAATCGACTTATCGACTAAAGCAACTGTTATC | SPy_1455; M5005_Spy1185; spyM18_1469; SDEG_1125                                                                        | 97         |
|                    | Spy02a_004                         | CAAAAATATCTGAAGAAGAATCCATTTAAGATCT  |                                                                                                                        |            |
| Spy02a_005         | TTTTAAATCGACATGTGCAGTACCAGTGTCTCTT | <i>Streptococcus</i> phage phi3396  | 94                                                                                                                     |            |

<sup>a</sup> Spacer code is according to <sup>11</sup>.

<sup>b</sup> Locus tags: SPy\_xxxx, SF370 (M1); M5005\_Spyxxxx (or M5005\_Spy\_xxxx), MGAS5005 (M1); MGAS10270\_Spyxxxx, MGAS10270 (M2); SpyM3\_xxxx, MGAS315 (M3); SPsxxxx, SSI-1 (M3); MGAS10750\_Spyxxxx, MGAS10750 (M4); SpyM5xxxx, Manfredo (M5); M6\_Spyxxxx, MGAS10394 (M6); MGAS2096\_SPYxxxx, MGAS2096 (M12); MGAS9429\_Spyxxxx, MGAS9429 (M12); spyM18\_xxxx, MGAS8232 (M18); M28\_Spyxxxx, MGAS6180 (M28); Spy49\_xxxx, NZ131 (M49); SDEG\_xxxx, *Streptococcus dysgalactiae* subsp. *equisimilis* GGS\_124; SAGxxxx, *Streptococcus agalactiae* 2603 (serotype V); SAK\_xxxx, *S. agalactiae* A909 (serotype Ia); SEQ\_xxxx, *Streptococcus equi* subsp. *equi* 4047. Intriguingly, five spacers show 80 to 100% sequence identity to endogenous genes (MGAS10750\_Spy1310, MGAS10750\_Spy1314, MGAS2096\_Spy0006, MGAS9429\_Spy0006 and Spy49\_1465c). The presence of self-targeting spacers (see also the self-targeting spacer (Spyo1h\_001) of the SF370 genome in Supplementary Table 2) suggests a complex mechanism for self versus non-self targeting in *S. pyogenes*.

**Supplementary Table 5. List of CRISPR-associated genes in *S. pyogenes* clinical isolates with complete genome sequence available. Panel A: CRISPR01-associated genes. Panel B: CRISPR02-associated genes.**

**A. CRISPR01**

| STRAIN <sup>a</sup> | CSN1              |                         | CAS1              |                         | CAS2              |                         | CSN2              |                         |
|---------------------|-------------------|-------------------------|-------------------|-------------------------|-------------------|-------------------------|-------------------|-------------------------|
|                     | GENE <sup>b</sup> | % IDENTITY <sup>c</sup> |
| SF370               | 1046              | 100.0                   | 1047              | 100.0                   | 1048              | 100.0                   | 1049              | 100.0                   |
| MGAS5005            | 0769              | 99.9                    | 0770              | 100.0                   | 0771              | 100.0                   | 0772              | 100.0                   |
| MGAS10270           | 0886              | 99.6                    | 0887              | 100.0                   | 0888              | 100.0                   | 0889              | 90.2                    |
| MGAS315             | 0677              | 98.8                    | 0678              | 100.0                   | 0679              | 99.1                    | 0680              | 99.1                    |
| SSI-1               | 1176              | 98.8                    | 1175              | 100.0                   | 1174              | 99.1                    | 1173              | 99.1                    |
| MGAS10750           | 0921              | 88.6                    | 0922              | 97.9                    | 0923              | 100.0                   | 0924              | 97.3                    |
| Manfredo            | -                 | -                       | -                 | -                       | -                 | -                       | -                 | -                       |
| MGAS10394           | -                 | -                       | -                 | -                       | -                 | -                       | -                 | -                       |
| MGAS2096            | 0843              | 99.3                    | 0844              | 100.0                   | 0845              | 100.0                   | 0846              | 99.1                    |
| MGAS9429            | 0885              | 99.2                    | 0886              | 100.0                   | 0887              | 100.0                   | 0888              | 99.1                    |
| MGAS8232            | -                 | -                       | -                 | -                       | -                 | -                       | -                 | -                       |
| MGAS6180            | 0748              | 99.3                    | 0749              | 100.0                   | 0750              | 100.0                   | 0751              | 99.1                    |
| NZ131               | 0823              | 98.4                    | 0825              | 99.0                    | 0826              | 100.0                   | 0827              | 99.1                    |
| M49 591             | 0639              | ND                      | 0640              | ND                      | 0641              | ND                      | 0642              | ND                      |

**B. CRISPR02**

| STRAIN <sup>a</sup> | CAS3              |                         | CAS5D (CSD5D)     |                         | CSD1              |                         | CSD2              |                         | CAS4              |                         | CAS1              |                         | CAS2              |                         |
|---------------------|-------------------|-------------------------|-------------------|-------------------------|-------------------|-------------------------|-------------------|-------------------------|-------------------|-------------------------|-------------------|-------------------------|-------------------|-------------------------|
|                     | GENE <sup>b</sup> | % IDENTITY <sup>c</sup> |
| SF370               | 1567              | 100.0                   | 1566              | 100.0                   | 1565              | 100.0                   | 1564              | 100.0                   | 1563              | 100.0                   | 1562              | 100.0                   | 1561              | 100.0                   |
| MGAS5005            | 1291              | 100.0                   | 1290              | 100.0                   | 1289              | 99.8                    | 1288              | 100.0                   | 1287              | 100.0                   | 1286              | 100.0                   | 1285              | 100.0                   |
| MGAS10270           | 1372              | 98.6                    | 1371              | 99.6                    | 1370              | 99.5                    | 1369              | 99.3                    | 1368              | 99.6                    | 1366              | 90.2                    | 1365              | 100.0                   |
| MGAS315             | -                 | -                       | -                 | -                       | -                 | -                       | -                 | -                       | -                 | -                       | -                 | -                       | -                 | -                       |
| SSI-1               | -                 | -                       | -                 | -                       | -                 | -                       | -                 | -                       | -                 | -                       | -                 | -                       | -                 | -                       |
| MGAS10750           | 1399              | 99.3 <sup>d</sup>       | 1397              | 99.6                    | 1396              | 98.6                    | 1395              | 98.6                    | 1394              | 99.6                    | 1393              | 99.1                    | 1392              | 100.0                   |
| Manfredo            | -                 | -                       | -                 | -                       | -                 | -                       | -                 | -                       | -                 | -                       | -                 | -                       | -                 | -                       |
| MGAS10394           | -                 | -                       | -                 | -                       | -                 | -                       | -                 | -                       | -                 | -                       | -                 | -                       | -                 | -                       |
| MGAS2096            | 1310              | 99.5                    | 1309              | 99.6                    | 1308              | 98.7                    | 1307              | 99.3                    | 1306              | 100.0                   | 1305              | 99.7                    | 1304              | 100.0                   |
| MGAS9429            | 1285              | 99.5                    | 1284              | 99.6                    | 1283              | 98.7                    | 1282              | 99.3                    | 1281              | 100.0                   | 1280              | 99.7                    | 1279              | 100.0                   |
| MGAS8232            | -                 | -                       | -                 | -                       | -                 | -                       | -                 | -                       | -                 | -                       | -                 | -                       | -                 | -                       |
| MGAS6180            | 1295              | 99.5                    | 1294              | 100.0                   | 1293              | 98.9                    | 1292              | 99.3                    | 1291              | 99.6                    | 1290              | 99.1                    | 1289              | 100.0                   |
| NZ131               | 1213              | 99.0                    | 1212              | 99.6                    | 1211              | 99.0                    | 1210              | 99.6                    | 1209              | 100.0                   | 1208              | 100.0                   | 1207              | 100.0                   |
| M49 591             | 0911              | ND                      | 0910              | ND                      | 0909              | ND                      | 0908              | ND                      | ND                | ND                      | ND                | ND                      | 0907              | ND                      |

<sup>a</sup> *S. pyogenes* M49 591, unfinished sequence, whole genome shotgun sequencing project.

<sup>b</sup> Gene number from strain locus tag is given.

<sup>c</sup> Protein identity is according to KEGG database (<http://www.genome.jp/kegg/>). Percent identities refer to SF370 proteins.

<sup>d</sup> C-terminus-truncated protein, does not contain the predicted helicase domain.

**Supplementary Table 6. Differential RNA sequencing (raw) data of intergenic small RNAs expressed in *S. pyogenes* SF370 SPY- (total) and SPY+ (enriched) libraries.**

| CANDIDATE <sup>a</sup> | COORDINATES <sup>b</sup> |        | SIZE (nt) | ORIENTATION <sup>c</sup> | ADJACENT GENES <sup>d</sup> | LIBRARY SPY- <sup>e</sup> |       | LIBRARY SPY+ <sup>e</sup> |       | ENRICHMENT <sup>f</sup> |
|------------------------|--------------------------|--------|-----------|--------------------------|-----------------------------|---------------------------|-------|---------------------------|-------|-------------------------|
|                        |                          |        |           |                          |                             | OCC.                      | %     | OCC.                      | %     |                         |
| SPync001               | 33952                    | 33977  | 26        | →→→                      | SPy_0021 / SPy_0022         | -                         | -     | 2                         | 0.114 | -                       |
| SPync002               | 75867                    | 75892  | 26        | →→→                      | SPy_0074 / SPy_0075         | 13                        | 0.505 | 36                        | 2.050 | 4.06                    |
| SPync003               | 93359                    | 93452  | 94        | →→→                      | SPy_0097 / SPy_0098         | 20                        | 0.776 | 22                        | 1.253 | 1.61                    |
| SPync004               | 116781                   | 116940 | 160       | ←→→                      | SPy_0124 / SPy_0127         | 7                         | 0.272 | 5                         | 0.285 | 1.05                    |
| SPync005               | 117005                   | 117382 | 378       | ←→→                      | SPy_0124 / SPy_0127         | 7                         | 0.272 | -                         | -     | -                       |
| SPync006               | 117449                   | 117638 | 190       | ←→→                      | SPy_0124 / SPy_0127         | 3                         | 0.116 | 2                         | 0.114 | 0.98                    |
| SPync007               | 118243                   | 118267 | 25        | ←→→                      | SPy_0124 / SPy_0127         | 2                         | 0.078 | -                         | -     | -                       |
| SPync008               | 118454                   | 118679 | 226       | ←→→                      | SPy_0124 / SPy_0127         | 2                         | 0.078 | -                         | -     | -                       |
| SPync009               | 148619                   | 148656 | 38        | →→→                      | SPy_0163 / SPy_0164         | 8                         | 0.311 | 26                        | 1.481 | 4.77                    |
| SPync010               | 174217                   | 174355 | 139       | →→→                      | SPy_0185 / SPy_0186         | 2                         | 0.078 | -                         | -     | -                       |
| SPync011               | 174317                   | 174339 | 23        | →←→                      | SPy_0185 / SPy_0186         | 4                         | 0.155 | -                         | -     | -                       |
| SPync012               | 193039                   | 193067 | 29        | →→←                      | SPy_0215 / SPy_0216         | 6                         | 0.233 | -                         | -     | -                       |
| SPync013               | 195120                   | 195261 | 142       | ←←→                      | SPy_0216 / SPy_0217         | 22                        | 0.854 | 19                        | 1.082 | 1.27                    |
| SPync014               | 207419                   | 207451 | 33        | →→→                      | SPy_0237 / SPy_0238         | 2                         | 0.078 | -                         | -     | -                       |
| SPync015               | 213738                   | 213967 | 230       | →→→                      | SPy_0245 / SPy_0246         | 7                         | 0.272 | 2                         | 0.114 | 0.42                    |
| SPync016               | 235753                   | 235809 | 57        | →→→                      | SPy_0269 / SPy_0271         | 3                         | 0.116 | 9                         | 0.513 | 4.40                    |
| SPync017               | 239475                   | 239505 | 31        | →→→                      | SPy_0273 / SPy_0274         | 4                         | 0.155 | 8                         | 0.456 | 2.93                    |
| SPync018               | 254646                   | 254675 | 30        | →→←                      | SPy_0290 / SPy_0292         | 2                         | 0.078 | -                         | -     | -                       |
| SPync019               | 254861                   | 254880 | 20        | →←←                      | SPy_0290 / SPy_0292         | 3                         | 0.116 | -                         | -     | -                       |
| SPync020               | 254987                   | 255200 | 214       | →←←                      | SPy_0290 / SPy_0292         | 2                         | 0.078 | -                         | -     | -                       |
| SPync021               | 279245                   | 279299 | 55        | →→→                      | SPy_0316 / SPy_0317         | 2                         | 0.078 | -                         | -     | -                       |
| SPync022               | 291636                   | 291799 | 164       | →→→                      | SPy_0334 / SPy_0337         | 26                        | 1.009 | 13                        | 0.740 | 0.73                    |
| SPync023               | 291895                   | 291913 | 19        | →←→                      | SPy_0334 / SPy_0337         | 3                         | 0.116 | -                         | -     | -                       |
| SPync024               | 318404                   | 318504 | 101       | →→→                      | SPy_0370 / SPy_0371         | 9                         | 0.349 | 7                         | 0.399 | 1.14                    |
| SPync025               | 319190                   | 319385 | 196       | →→→                      | SPy_0371 / SPy_0373         | 11                        | 0.427 | 6                         | 0.342 | 0.80                    |
| SPync026               | 320611                   | 320690 | 80        | →→→                      | SPy_0374 / SPy_0376         | 2                         | 0.078 | -                         | -     | -                       |
| SPync027               | 334719                   | 334770 | 52        | →→→                      | SPy_0393 / SPy_0395         | -                         | -     | 6                         | 0.342 | -                       |
| SPync028               | 340985                   | 341032 | 48        | ←→→                      | SPy_0393 / SPy_0395         | 4                         | 0.155 | -                         | -     | -                       |
| SPync029               | 353014                   | 353122 | 109       | →→→                      | SPy_0422 / SPy_0425         | -                         | -     | 5                         | 0.285 | -                       |
| SPync030               | 365319                   | 365355 | 37        | →→→                      | SPy_0441 / SPy_0442         | 2                         | 0.078 | -                         | -     | -                       |
| SPync031               | 365567                   | 365585 | 19        | →→→                      | SPy_0441 / SPy_0442         | 2                         | 0.078 | -                         | -     | -                       |
| SPync032               | 384429                   | 384545 | 117       | →→→                      | SPy_0469 / SPy_0470         | 2                         | 0.078 | 5                         | 0.285 | 3.67                    |
| SPync033               | 391409                   | 391475 | 67        | ←→→                      | SPy_0478 / SPy_0479         | 9                         | 0.349 | -                         | -     | -                       |
| SPync034               | 392307                   | 392328 | 22        | →→←                      | SPy_0480 / SPy_0481         | 8                         | 0.311 | -                         | -     | -                       |
| SPync035               | 392989                   | 393045 | 57        | ←→→                      | SPy_0481 / SPy_0484         | 3                         | 0.116 | 2                         | 0.114 | 0.98                    |
| SPync036               | 394513                   | 394564 | 52        | →→→                      | SPy_0486 / SPy_0488         | 4                         | 0.155 | -                         | -     | -                       |

| CANDIDATE <sup>a</sup>      | COORDINATES <sup>b</sup> |               | SIZE (nt)  | ORIENTATION <sup>c</sup> | ADJACENT GENES <sup>d</sup> | LIBRARY SPY <sup>-e</sup> |               | LIBRARY SPY <sup>+e</sup> |              | ENRICHMENT <sup>f</sup> |
|-----------------------------|--------------------------|---------------|------------|--------------------------|-----------------------------|---------------------------|---------------|---------------------------|--------------|-------------------------|
|                             |                          |               |            |                          |                             | OCC.                      | %             | OCC.                      | %            |                         |
| SPync037                    | 416968                   | 417181        | 214        | → → →                    | SPy_0516 / SPy_0517         | 12                        | 0.466         | 19                        | 1.082        | 2.32                    |
| SPync038                    | 450289                   | 450338        | 50         | → → →                    | SPy_0556 / SPy_0558         | 3                         | 0.116         | -                         | -            | -                       |
| SPync039                    | 455300                   | 455330        | 31         | → → ←                    | SPy_0563 / SPy_0565         | 2                         | 0.078         | -                         | -            | -                       |
| SPync040                    | 477702                   | 477741        | 40         | → ← ←                    | SPy_0593 / SPy_0595         | 3                         | 0.116         | -                         | -            | -                       |
| SPync041                    | 480669                   | 480696        | 28         | → ← ←                    | SPy_0596 / SPy_0598         | 4                         | 0.155         | -                         | -            | -                       |
| SPync042                    | 482816                   | 482963        | 148        | ← ← ←                    | SPy_0600 / SPy_0601         | 24                        | 0.932         | 30                        | 1.708        | 1.83                    |
| SPync043                    | 500054                   | 500171        | 118        | → → →                    | SPy_0622 / SPy_0623         | 21                        | 0.815         | 33                        | 1.879        | 2.31                    |
| SPync044                    | 516048                   | 516126        | 79         | → → →                    | SPy_0642 / SPy_0643         | -                         | -             | 2                         | 0.114        | -                       |
| SPync045                    | 519042                   | 519069        | 28         | → ← ←                    | SPy_0645 / SPy_0646         | 2                         | 0.078         | -                         | -            | -                       |
| SPync046                    | 531082                   | 531162        | 81         | ← → ←                    | SPy_0655 / SPy_0656         | 9                         | 0.349         | -                         | -            | -                       |
| SPync047                    | 531117                   | 531142        | 26         | ← ← ←                    | SPy_0655 / SPy_0656         | 2                         | 0.078         | -                         | -            | -                       |
| SPync048                    | 532743                   | 532788        | 46         | → ← →                    | SPy_0658 / SPy_0659         | 2                         | 0.078         | 7                         | 0.399        | 5.13                    |
| SPync049                    | 544208                   | 544233        | 26         | → → →                    | SPy_0676 / SPy_0677         | 2                         | 0.078         | -                         | -            | -                       |
| SPync050                    | 544265                   | 544313        | 49         | → ← →                    | SPy_0676 / SPy_0677         | 161                       | 6.250         | 86                        | 4.897        | 0.78                    |
| SPync051                    | 546305                   | 546568        | 264        | → → →                    | SPy_0679 / SPy_0680         | 4                         | 0.155         | -                         | -            | -                       |
| SPync052                    | 570184                   | 570216        | 33         | ← ← →                    | SPy_0712 / SPy_0713         | -                         | -             | 2                         | 0.114        | -                       |
| SPync053                    | 598538                   | 598590        | 53         | → → →                    | SPy_0737 / SPy_0738         | 2                         | 0.078         | -                         | -            | -                       |
| SPync054                    | 610456                   | 610546        | 91         | → → →                    | SPy_0747 / SPy_0749         | 2                         | 0.078         | -                         | -            | -                       |
| SPync055                    | 611058                   | 611099        | 42         | → → →                    | SPy_0749 / SPy_0751         | 3                         | 0.116         | -                         | -            | -                       |
| SPync056                    | 623726                   | 623927        | 202        | → → →                    | SPy_0766 / SPy_0768         | 3                         | 0.116         | 6                         | 0.342        | 2.93                    |
| SPync057                    | 661400                   | 661517        | 118        | → → →                    | SPy_0803 / SPy_0804         | 12                        | 0.466         | 36                        | 2.050        | 4.40                    |
| SPync058                    | 670424                   | 670496        | 73         | → → ←                    | SPy_0813 / SPy_0814         | 6                         | 0.233         | -                         | -            | -                       |
| SPync059                    | 680209                   | 680258        | 50         | → → →                    | SPy_0827 / SPy_0830         | 9                         | 0.349         | -                         | -            | -                       |
| SPync060                    | 694259                   | 694308        | 50         | → → →                    | SPy_0841 / SPy_0843         | 2                         | 0.114         | -                         | -            | -                       |
| SPync061                    | 704620                   | 704656        | 37         | → → →                    | SPy_0852 / SPy_0853         | 4                         | 0.228         | -                         | -            | -                       |
| SPync062                    | 717625                   | 717809        | 185        | → → →                    | SPy_0867 / SPy_0870         | -                         | -             | 6                         | 0.342        | -                       |
| SPync063                    | 736913                   | 736994        | 82         | ← ← →                    | SPy_0888 / SPy_0889         | 2                         | 0.078         | -                         | -            | -                       |
| SPync064                    | 736937                   | 736980        | 44         | ← → →                    | SPy_0888 / SPy_0889         | 3                         | 0.116         | -                         | -            | -                       |
| SPync065                    | 744487                   | 744599        | 113        | → → →                    | SPy_0899 / SPy_0900         | 5                         | 0.194         | 23                        | 1.310        | 6.75                    |
| SPync066                    | 762841                   | 762872        | 32         | → → →                    | SPy_0917 / SPy_0918         | -                         | -             | 2                         | 0.114        | -                       |
| SPync067                    | 779816                   | 779906        | 91         | ← → ←                    | SPy_0937 / SPy_0938         | 36                        | 1.398         | 6                         | 0.342        | 0.24                    |
| SPync068                    | 779835                   | 779869        | 35         | ← ← ←                    | SPy_0937 / SPy_0938         | 6                         | 0.233         | -                         | -            | -                       |
| SPync069                    | 779921                   | 780010        | 90         | ← ← ←                    | SPy_0937 / SPy_0938         | -                         | -             | 8                         | 0.456        | -                       |
| SPync070                    | 792418                   | 792465        | 48         | → ← →                    | SPy_0965 / SPy_0967         | 21                        | 0.815         | 67                        | 3.815        | 4.68                    |
| SPync071                    | 800300                   | 800369        | 70         | → ← →                    | SPy_0978 / SPy_0979         | 14                        | 0.543         | 17                        | 0.968        | 1.78                    |
| SPync072                    | 819045                   | 819088        | 44         | → → →                    | SPy_1006 / SPy_1007         | -                         | -             | 5                         | 0.285        | -                       |
| SPync073                    | 826031                   | 826112        | 82         | ← → →                    | SPy_1013 / SPy_1016         | 3                         | 0.116         | -                         | -            | -                       |
| <b>SPync074 / tracrRNA</b>  | <b>854346</b>            | <b>854545</b> | <b>200</b> | <b>→ ← →</b>             | <b>SPy_1044 / SPy_1046</b>  | <b>472</b>                | <b>18.323</b> | <b>139</b>                | <b>7.916</b> | <b>0.43</b>             |
| <b>SPync075 / pre-crRNA</b> | <b>860730</b>            | <b>861239</b> | <b>510</b> | <b>→ → →</b>             | <b>SPy_1049 / SPy_1052</b>  | <b>84</b>                 | <b>3.261</b>  | <b>4</b>                  | <b>0.228</b> | <b>0.07</b>             |

| CANDIDATE <sup>a</sup> | COORDINATES <sup>b</sup> |         | SIZE (nt) | ORIENTATION <sup>c</sup> | ADJACENT GENES <sup>d</sup> | LIBRARY SPY <sup>-e</sup> |       | LIBRARY SPY+ <sup>e</sup> |       | ENRICHMENT <sup>f</sup> |
|------------------------|--------------------------|---------|-----------|--------------------------|-----------------------------|---------------------------|-------|---------------------------|-------|-------------------------|
|                        |                          |         |           |                          |                             | OCC.                      | %     | OCC.                      | %     |                         |
| SPync076               | 882398                   | 882493  | 96        | ← → →                    | SPy_1071 / SPy_1072         | 4                         | 0.155 | 2                         | 0.114 | 0.73                    |
| SPync077               | 883527                   | 883559  | 33        | → → →                    | SPy_1073 / SPy_1075         | 2                         | 0.078 | -                         | -     | -                       |
| SPync078               | 892663                   | 892687  | 25        | → → →                    | SPy_1088 / SPy_1092         | 2                         | 0.078 | -                         | -     | -                       |
| SPync079               | 900294                   | 900327  | 34        | → → →                    | SPy_1100 / SPy_1101         | 4                         | 0.155 | -                         | -     | -                       |
| SPync080               | 925914                   | 925944  | 31        | → → ←                    | SPy_1129 / SPy_1131         | 6                         | 0.233 | -                         | -     | -                       |
| SPync081               | 930739                   | 930907  | 169       | → → →                    | SPy_1135 / SPy_1136         | 4                         | 0.155 | 3                         | 0.171 | 1.10                    |
| SPync082               | 950946                   | 951202  | 257       | → → →                    | SPy_1155 / SPy_1156         | 3                         | 0.116 | 7                         | 0.399 | 3.42                    |
| SPync083               | 956690                   | 956718  | 29        | → → →                    | SPy_1163 / SPy_1164         | -                         | -     | 2                         | 0.114 | -                       |
| SPync084               | 995996                   | 996147  | 152       | ← ← ←                    | SPy_1211 / SPy_1212         | 15                        | 0.582 | 23                        | 1.310 | 2.25                    |
| SPync085               | 1015415                  | 1015638 | 224       | ← ← ←                    | SPy_1230 / SPy_1232         | -                         | -     | 6                         | 0.342 | -                       |
| SPync086               | 1043592                  | 1043669 | 78        | ← ← ←                    | SPy_1265 / SPy_1267         | -                         | -     | 7                         | 0.399 | -                       |
| SPync087               | 1046345                  | 1046592 | 248       | ← → →                    | SPy_1267 / SPy_1270         | 12                        | 0.466 | 25                        | 1.424 | 3.06                    |
| SPync088               | 1056325                  | 1056373 | 49        | ← ← ←                    | SPy_1281 / SPy_1282         | 4                         | 0.155 | -                         | -     | -                       |
| SPync089               | 1065375                  | 1065433 | 59        | → → →                    | SPy_s01 / SPy_1290          | 4                         | 0.155 | -                         | -     | -                       |
| SPync090               | 1110799                  | 1110925 | 127       | ← ← →                    | SPy_1340 / SPy_1343         | -                         | -     | 7                         | 0.399 | -                       |
| SPync091               | 1126627                  | 1126903 | 277       | ← ← ←                    | SPy_1359 / SPy_1361         | 6                         | 0.233 | -                         | -     | -                       |
| SPync092               | 1141311                  | 1141334 | 24        | ← ← →                    | SPy_1373 / SPy_1374         | 4                         | 0.228 | -                         | -     | -                       |
| SPync093               | 1177552                  | 1177592 | 41        | ← ← ←                    | SPy_1416 / SPy_1419         | 2                         | 0.078 | -                         | -     | -                       |
| SPync094               | 1182402                  | 1182452 | 51        | ← → →                    | SPy_1423 / SPy_1424         | 3                         | 0.116 | -                         | -     | -                       |
| SPync095               | 1186759                  | 1186876 | 118       | → ← ←                    | SPy_1432 / SPy_1434         | 5                         | 0.194 | -                         | -     | -                       |
| SPync096               | 1219348                  | 1219391 | 44        | ← → ←                    | SPy_1484 / SPy_1485         | 27                        | 1.048 | 7                         | 0.399 | 0.38                    |
| SPync097               | 1221287                  | 1221363 | 77        | → ← →                    | SPy_1487 / SPy_1488         | 4                         | 0.155 | -                         | -     | -                       |
| SPync098               | 1221305                  | 1221337 | 33        | → → →                    | SPy_1487 / SPy_1488         | 3                         | 0.116 | -                         | -     | -                       |
| SPync099               | 1245098                  | 1245204 | 107       | ← ← ←                    | SPy_1513 / SPy_1514         | 2                         | 0.078 | -                         | -     | -                       |
| SPync100               | 1259958                  | 1260092 | 135       | ← ← →                    | SPy_1531 / SPy_1532         | 23                        | 0.893 | 14                        | 0.797 | 0.89                    |
| SPync101               | 1267768                  | 1267850 | 83        | ← ← ←                    | SPy_1539 / SPy_1541         | 2                         | 0.078 | -                         | -     | -                       |
| SPync102               | 1274705                  | 1274742 | 38        | ← ← ←                    | SPy_1547 / SPy_1548         | 2                         | 0.114 | -                         | -     | -                       |
| SPync103               | 1295681                  | 1295825 | 145       | ← ← ←                    | SPy_1570 / SPy_1571         | 6                         | 0.233 | 26                        | 1.481 | 6.36                    |
| SPync104               | 1329485                  | 1329560 | 76        | → → →                    | SPy_1608 / SPy_1610         | 5                         | 0.194 | -                         | -     | -                       |
| SPync105               | 1375180                  | 1375200 | 21        | ← ← ←                    | SPy_1654 / SPy_1656         | -                         | -     | 2                         | 0.114 | -                       |
| SPync106               | 1389798                  | 1389821 | 24        | ← ← ←                    | SPy_1675 / SPy_1676         | -                         | -     | 4                         | 0.228 | -                       |
| SPync107               | 1404702                  | 1404773 | 72        | ← ← ←                    | SPy_1689 / SPy_1691         | 5                         | 0.194 | 4                         | 0.228 | 1.17                    |
| SPync108               | 1404854                  | 1404921 | 68        | ← ← ←                    | SPy_1689 / SPy_1691         | 2                         | 0.078 | -                         | -     | -                       |
| SPync109               | 1424598                  | 1424669 | 72        | ← ← ←                    | SPy_1719 / SPy_1721         | 2                         | 0.078 | -                         | -     | -                       |
| SPync110               | 1434502                  | 1434542 | 41        | → → ←                    | SPy_1731 / SPy_1733         | 2                         | 0.078 | -                         | -     | -                       |
| SPync111               | 1443306                  | 1443489 | 184       | → → →                    | SPy_1741 / SPy_1742         | 2                         | 0.078 | 7                         | 0.399 | 5.13                    |
| SPync112               | 1471969                  | 1472001 | 33        | → ← ←                    | SPy_1780 / SPy_1781         | 3                         | 0.116 | -                         | -     | -                       |
| SPync113               | 1525734                  | 1525787 | 54        | ← ← ←                    | SPy_1837 / SPy_1839         | 2                         | 0.078 | -                         | -     | -                       |
| SPync114               | 1539483                  | 1539578 | 96        | ← ← ←                    | SPy_1854 / SPy_1856         | 9                         | 0.349 | 11                        | 0.626 | 1.79                    |

| CANDIDATE <sup>a</sup> | COORDINATES <sup>b</sup> |         | SIZE (nt) | ORIENTATION <sup>c</sup> | ADJACENT GENES <sup>d</sup> | LIBRARY SPY- <sup>e</sup> |       | LIBRARY SPY+ <sup>e</sup> |       | ENRICHMENT <sup>f</sup> |
|------------------------|--------------------------|---------|-----------|--------------------------|-----------------------------|---------------------------|-------|---------------------------|-------|-------------------------|
|                        |                          |         |           |                          |                             | OCC.                      | %     | OCC.                      | %     |                         |
| SPync115               | 1551946                  | 1551986 | 41        | ← ← →                    | SPy_1869 / SPy_1870         | 2                         | 0.078 | -                         | -     | -                       |
| SPync116               | 1555688                  | 1555887 | 200       | ← → →                    | SPy_1874 / SPy_1875         | 4                         | 0.155 | 5                         | 0.285 | 1.83                    |
| SPync117               | 1567929                  | 1567948 | 20        | ← ← ←                    | SPy_1889 / SPy_t52          | 6                         | 0.233 | 3                         | 0.171 | 0.73                    |
| SPync118               | 1571078                  | 1571135 | 58        | ← ← ←                    | SPy_1894 / SPy_1895         | 6                         | 0.233 | 16                        | 0.911 | 3.91                    |
| SPync119               | 1616478                  | 1616535 | 58        | ← ← ←                    | SPy_1942 / SPy_1944         | 3                         | 0.116 | -                         | -     | -                       |
| SPync120               | 1620414                  | 1620465 | 52        | ← ← ←                    | SPy_1946 / SPy_1947         | 3                         | 0.116 | 9                         | 0.513 | 4.40                    |
| SPync121               | 1682437                  | 1682459 | 23        | → ← ←                    | SPy_2013 / SPy_2016         | 2                         | 0.078 | -                         | -     | -                       |
| SPync122               | 1696383                  | 1696460 | 78        | ← → ←                    | SPy_2034 / SPy_2037         | -                         | -     | 2                         | 0.114 | -                       |
| SPync123               | 1698116                  | 1698270 | 155       | ← ← ←                    | SPy_2037 / SPy_2038         | 4                         | 0.155 | 25                        | 1.424 | 9.17                    |
| SPync124               | 1699865                  | 1700109 | 245       | ← ← ←                    | SPy_2039 / SPy_2040         | 9                         | 0.349 | -                         | -     | -                       |
| SPync125               | 1700636                  | 1700687 | 52        | → → →                    | SPy_2041 / SPy_2042         | 18                        | 0.699 | -                         | -     | -                       |
| SPync126               | 1700505                  | 1700699 | 195       | → ← →                    | SPy_2041 / SPy_2042         | 7                         | 0.272 | 34                        | 1.936 | 7.13                    |
| SPync127               | 1713445                  | 1713593 | 149       | ← ← ←                    | SPy_2058 / SPy_2059         | 4                         | 0.155 | 2                         | 0.114 | 0.73                    |
| SPync128               | 1713551                  | 1713600 | 50        | ← → ←                    | SPy_2058 / SPy_2059         | 3                         | 0.116 | -                         | -     | 0.00                    |
| SPync129               | 1718004                  | 1718024 | 21        | → ← ←                    | SPy_2063 / SPy_2065         | 5                         | 0.194 | -                         | -     | 0.00                    |
| SPync130               | 1721493                  | 1721621 | 129       | → ← ←                    | SPy_2066 / SPy_2070         | 29                        | 1.126 | 17                        | 0.968 | 0.86                    |
| SPync131               | 1721510                  | 1721598 | 89        | → → ←                    | SPy_2066 / SPy_2070         | 16                        | 0.621 | -                         | -     | -                       |
| SPync132               | 1755319                  | 1755445 | 127       | → ← ←                    | SPy_2099 / SPy_2102         | 29                        | 1.126 | 36                        | 2.050 | 1.82                    |
| SPync133               | 1760101                  | 1760323 | 223       | ← ← ←                    | SPy_2107 / SPy_2110         | -                         | -     | 3                         | 0.171 | -                       |
| SPync134               | 1774735                  | 1774778 | 44        | ← → ←                    | SPy_2122 / SPy_2125         | 2                         | 0.078 | -                         | -     | -                       |
| SPync135               | 1775001                  | 1775122 | 122       | ← ← ←                    | SPy_2122 / SPy_2125         | 8                         | 0.311 | -                         | -     | -                       |
| SPync136               | 1778711                  | 1778807 | 97        | → ← →                    | SPy_2129 / SPy_2130         | -                         | -     | 2                         | -     | -                       |
| SPync137               | 1811913                  | 1811977 | 65        | ← ← ←                    | SPy_2178 / SPy_2180         | -                         | -     | 2                         | 0.114 | -                       |
| SPync138               | 1820514                  | 1820593 | 80        | ← ← ←                    | SPy_2186 / SPy_2188         | 3                         | 0.116 | 4                         | 0.228 | 1.96                    |
| SPync139               | 1840683                  | 1840712 | 30        | ← ← ←                    | SPy_2206 / SPy_2207         | 2                         | 0.078 | 2                         | 0.114 | 1.47                    |
| SPync140               | 1851575                  | 1851593 | 19        | → ← →                    | SPy_2216 / SPy_2217         | -                         | -     | 2                         | 0.114 | -                       |

<sup>a</sup> Candidate names are given for *S. pyogenes* non-coding RNA candidate followed by an arbitrary number: SPyncXXX.

<sup>b</sup> The coordinates are according to the NCBI database (SF370 genome, accession number: NC\_002737).

<sup>c</sup> The orientation of the sRNA candidates and surrounding genes is depicted with arrows: →, plus strand; ←, minus strand.

<sup>d</sup> The identity of the surrounding genes is according to KEGG database (<http://www.genome.jp/kegg/>).

<sup>e</sup> Library SPY- (untreated total RNA) contains 2576 blast reads. Library SPY+ (TEX-treated total RNA) contains 1756 blast reads. Blast reads (less than 20 nt) do not overlap tRNAs, rRNAs, SRP RNA, RNase P RNA, tmRNA and all annotated ORFs specified in NC\_002737. Occurrence of the transcripts (OCC.) and % of representation are given.

<sup>f</sup> Enrichment values represent the ratio between occurrence of transcripts in library SPY+ comparing to that in library SPY- (%SPY+/%SPY-).



**Supplementary Table 8. Strains used in the study.**

| Strain                                        | Relevant characteristics                    | Source       |
|-----------------------------------------------|---------------------------------------------|--------------|
| <b><i>Streptococcus pyogenes</i></b>          |                                             |              |
| <b>WT</b>                                     |                                             |              |
| EC904                                         | SF370 (M1 serotype)                         | ATCC 700294  |
| EC1246                                        | MGAS8232 (M18 serotype)                     | ATCC BAA-572 |
| <b><math>\Delta</math>tracrRNA</b>            |                                             |              |
| EC1412                                        | SF370 (pEC264) (replicating at 28°C)        | This study   |
| EC1414                                        | SF370 $\Omega$ pEC264 (integration at 37°C) | This study   |
| EC1500                                        | SF370 $\Delta$ tracrRNA                     | This study   |
| EC1502                                        | SF370 WT-T $\S$ after loss of pEC264)       | This study   |
| EC1807                                        | EC1500 complemented with pEC268             | This study   |
| EC1808                                        | EC1500 complemented with pEC269             | This study   |
| <b><math>\Delta</math>pre-crRNA</b>           |                                             |              |
| EC1472                                        | SF370 (pEC273) (replicating at 28°C)        | This study   |
| EC1475                                        | SF370 $\Omega$ pEC273 (integration at 37°C) | This study   |
| EC1479                                        | SF370 $\Delta$ pre-crRNA                    | This study   |
| EC1484                                        | SF370 WT-T $\S$ after loss of pEC273)       | This study   |
| EC1809                                        | EC1479 complemented with pEC299             | This study   |
| <b><math>\Delta</math>csn1-cas1-cas2-csn2</b> |                                             |              |
| EC1625                                        | SF370 (pEC298) (replicating at 28°C)        | This study   |
| EC1626                                        | SF370 $\Omega$ pEC298 (integration at 37°C) | This study   |
| EC1630                                        | SF370 $\Delta$ csn1-cas1-cas2-csn2          | This study   |
| EC1631                                        | SF370 WT-T $\S$ after loss of pEC298)       | This study   |
| EC1691                                        | EC1630 complemented with pEC306             | This study   |
| EC1692                                        | EC1630 complemented with pEC308             | This study   |
| EC1693                                        | EC1630 complemented with pEC307             | This study   |
| EC1686                                        | EC1630 complemented with pEC268             | This study   |
| EC1685                                        | EC1630 complemented with pEC269             | This study   |
| EC1828                                        | EC1630 complemented with pEC368             | This study   |
| <b><math>\Delta</math>csn1</b>                |                                             |              |
| EC1783                                        | SF370 (pEC315) (replicating at 28°C)        | This study   |
| EC1785                                        | SF370 $\Omega$ pEC315 (integration at 37°C) | This study   |
| EC1788                                        | SF370 $\Delta$ csn1                         | This study   |
| EC1791                                        | SF370 WT-T $\S$ after loss of pEC315)       | This study   |
| EC1801                                        | EC1788 complemented with pEC268             | This study   |
| EC1824                                        | EC1788 complemented with pEC368             | This study   |
| <b><math>\Delta</math>cas1</b>                |                                             |              |
| EC1654                                        | SF370 (pEC312) (replicating at 28°C)        | This study   |
| EC1661                                        | SF370 $\Omega$ pEC312 (integration at 37°C) | This study   |
| EC1675                                        | SF370 $\Delta$ cas1                         | This study   |
| EC1681                                        | SF370 WT-T $\S$ after loss of pEC312)       | This study   |
| <b><math>\Delta</math>cas2</b>                |                                             |              |
| EC1658                                        | SF370 (pEC313) (replicating at 28°C)        | This study   |
| EC1667                                        | SF370 $\Omega$ pEC313 (integration at 37°C) | This study   |
| EC1793                                        | SF370 $\Delta$ cas2                         | This study   |
| EC1794                                        | SF370 WT-T $\S$ after loss of pEC313)       | This study   |
| <b><math>\Delta</math>csn2</b>                |                                             |              |
| EC1656                                        | SF370 (pEC314) (replicating at 28°C)        | This study   |
| EC1664                                        | SF370 $\Omega$ pEC314 (integration at 37°C) | This study   |
| EC1796                                        | SF370 $\Delta$ csn2                         | This study   |
| EC1798                                        | SF370 WT-T $\S$ after loss of pEC314)       | This study   |
| EC1812                                        | EC1796 complemented with pEC299             | This study   |
| EC1810                                        | EC1796 complemented with pEC307             | This study   |
| <b><math>\Delta</math>rnc</b>                 |                                             |              |
| EC1620                                        | SF370 (pEC297) (replicating at 28°C)        | This study   |



| <b>Strain</b>                            | <b>Relevant characteristics</b>    | <b>Source</b>                   |
|------------------------------------------|------------------------------------|---------------------------------|
| EC1633                                   | SF370ΩpEC297 (integration at 37°C) | This study                      |
| EC1636                                   | SF370Δ <i>rnc</i>                  | This study                      |
| EC1637                                   | SF370 WT-TS after loss of pEC297)  | This study                      |
| EC1804                                   | EC1636 complemented with pEC366    | This study                      |
| <b><i>Streptococcus mutans</i></b>       |                                    |                                 |
| EC1293                                   | UA159 (WT)                         | Pierre Renault                  |
| <b><i>Streptococcus thermophilus</i></b> |                                    |                                 |
| EC810                                    | LMD-9 (WT)                         | Pierre Renault                  |
| <b><i>Staphylococcus epidermidis</i></b> |                                    |                                 |
| EC1617                                   | RP62a (WT)                         | Knut Ohlsen, Mohammad Shahrooei |
| <b><i>Listeria innocua</i></b>           |                                    |                                 |
| EC917                                    | Clip11262 (WT)                     | Thomas Decker                   |
| <b><i>Neisseria meningitidis</i></b>     |                                    |                                 |
| Z2491                                    | A Z2491 (WT)                       | Thomas Meyer                    |
| <b><i>E. coli</i></b>                    |                                    |                                 |
| TOP10                                    | Host for cloning                   | Invitrogen                      |
| XL10                                     | Host for cloning                   | Stratagene                      |

**Supplementary Table 9. Plasmids used in the study.**

| Plasmids                                                                   | Relevant characteristics                                                                                  | Source                |
|----------------------------------------------------------------------------|-----------------------------------------------------------------------------------------------------------|-----------------------|
| <b>Vectors for <i>S. pyogenes</i></b>                                      |                                                                                                           |                       |
| pEC85                                                                      | <i>repDEG</i> -pAM $\beta$ 1, pJH1- <i>aphIII</i> , ColE1                                                 | Lab strain collection |
| pEC214                                                                     | <i>repAts</i> -pWV01, pJH1- <i>aphIII</i> , <i>PclpB-<math>\beta</math>gaB</i> , ColE1                    | This study            |
| <b>Plasmids for gene-deletion mutants in <i>S. pyogenes</i></b>            |                                                                                                           |                       |
| pEC264                                                                     | pEC214 $\Omega$ $\Delta$ tracrRNAup- $\Delta$ tracrRNA <sub>dw</sub>                                      | This study            |
| pEC273                                                                     | pEC214 $\Omega$ $\Delta$ pre-crRNAup- $\Delta$ pre-crRNA <sub>dw</sub>                                    | This study            |
| pEC298                                                                     | pEC214 $\Omega$ $\Delta$ <i>csn1-cas1-cas2-csn2</i> up- $\Delta$ <i>csn1-cas1-cas2-csn2</i> <sub>dw</sub> | This study            |
| pEC315                                                                     | pEC214 $\Omega$ $\Delta$ <i>csn1</i> up- $\Delta$ <i>csn1</i> <sub>dw</sub>                               | This study            |
| pEC312                                                                     | pEC214 $\Omega$ $\Delta$ <i>cas1</i> up- $\Delta$ <i>cas1</i> <sub>dw</sub>                               | This study            |
| pEC313                                                                     | pEC214 $\Omega$ $\Delta$ <i>cas2</i> up- $\Delta$ <i>cas2</i> <sub>dw</sub>                               | This study            |
| pEC314                                                                     | pEC214 $\Omega$ $\Delta$ <i>csn2</i> up- $\Delta$ <i>csn2</i> <sub>dw</sub>                               | This study            |
| pEC297                                                                     | pEC214 $\Omega$ $\Delta$ <i>rnc</i> up- $\Delta$ <i>rnc</i> <sub>dw</sub>                                 | This study            |
| <b>Complementation plasmids in <i>S. pyogenes</i></b>                      |                                                                                                           |                       |
| pEC268                                                                     | pEC85 $\Omega$ 171 tracrRNA (171 nt form)                                                                 | This study            |
| pEC269                                                                     | pEC85 $\Omega$ 89 tracrRNA (89 nt form)                                                                   | This study            |
| pEC299                                                                     | pEC85 $\Omega$ pre-crRNA                                                                                  | This study            |
| pEC368                                                                     | pEC85 $\Omega$ 171 tracrRNA- <i>Pcsn1-csn1</i>                                                            | This study            |
| pEC306                                                                     | pEC85 $\Omega$ <i>Pcsn1-cas1</i>                                                                          | This study            |
| pEC308                                                                     | pEC85 $\Omega$ <i>Pcsn1-cas2</i>                                                                          | This study            |
| pEC307                                                                     | pEC85 $\Omega$ <i>Pcsn1-csn2</i>                                                                          | This study            |
| pEC366                                                                     | pEC85 $\Omega$ <i>P<math>\Delta</math>rnc-rnc</i>                                                         | This study            |
| <b>Plasmids for CRISPR01 transformation read-out in <i>S. pyogenes</i></b> |                                                                                                           |                       |
| pEC138                                                                     | pEC85 $\Omega$ <i>P<math>\Delta</math>sagA-5'UTR<math>\Delta</math>sagA</i>                               | This study            |
| pEC367                                                                     | pEC85 $\Omega$ <i>speM</i>                                                                                | This study            |
| pEC287                                                                     | pEC85 $\Omega$ <i>P<math>\Delta</math>speM-speM</i>                                                       | This study            |
| pEC289                                                                     | pEC85 $\Omega$ <i>P<math>\Delta</math>speM-speM (A2773G)</i>                                              | This study            |
| pEC290                                                                     | pEC85 $\Omega$ <i>P<math>\Delta</math>speM-speM (T2785C)</i>                                              | This study            |

**Supplementary Table 10. Primers used in the study.**

| Purpose                                                         | Primer code | Sequence 5'-3' <sup>a</sup>                           | F/R <sup>b</sup> | Usage <sup>c</sup>                   |
|-----------------------------------------------------------------|-------------|-------------------------------------------------------|------------------|--------------------------------------|
| <b>Sequencing of CRISPR01 locus in <i>S. pyogenes</i> SF370</b> |             |                                                       |                  |                                      |
| <i>lepA</i>                                                     | OLEC1142    | GAAATTACGAATCTTCTCCTGACG                              | R                | PCR                                  |
| SPy_1559                                                        | OLEC1143    | GAATCATCTGCATCCAGTAAAATG                              | F                | PCR                                  |
| <i>cas2</i>                                                     | OLEC1144    | GGAAAAATTGGCAGAGGCGT                                  | R                | PCR                                  |
| <b>tracrRNA expression in <i>S. pyogenes</i> SF370</b>          |             |                                                       |                  |                                      |
| tracrRNA mapping                                                | OLEC702     | ATACTTCTATTCTACTCTGAC                                 | F                | SL                                   |
|                                                                 | OLEC703     | CGACTCGGTGCCACTTTTTCA                                 | R                | SL, PE                               |
| tracrRNA analysis                                               | OLEC1698    | CAGCCATAAAACAATACTTAATAC                              | F                | NB (5' probe)                        |
|                                                                 | OLEC1014    | GGACTAGCCTTATTTAACTTG                                 | R                | NB (3' probe)                        |
|                                                                 | OLEC1697    | GAAATTAATACGACTCACTATAGGGCACCGACTCGG<br>TGCCACTTTTTTC | R                | NB (3' probe)                        |
|                                                                 | OLEC1299    | GAAATTAATACGACTCACTATAGGTTGGAACCATTCA<br>AAACAGCATAGC | F                | RT-PCR                               |
|                                                                 | OLEC1522    | AAAAAAGCACCGACTCGGTGCCAC                              | R                | RT-PCR                               |
| <b>crRNA (CRISPR01) expression in <i>S. pyogenes</i> SF370</b>  |             |                                                       |                  |                                      |
| pre-crRNA mapping                                               | OLEC1426    | GACAAATAGTGCATTAC                                     | F                | SL                                   |
|                                                                 | OLEC1425    | AGCTAGACTTCAGTCTTG                                    | R                | SL                                   |
|                                                                 | OLEC1427    | AATAAATGCAGTAATACAGG                                  | F                | SL, RT-PCR                           |
|                                                                 | OLEC1428    | CTCGTAGACTATTTTTGTC                                   | R                | SL, RT-PCR                           |
| crRNA expression analysis                                       | OLEC1227    | TCTCAGCTAGACTTCAGTCTTGAA                              | R                | NB (leader)                          |
|                                                                 | OLEC1050    | GCACTATTTGTCTCAGCTAGACTTCAGTCT                        | R                | NB (leader)                          |
|                                                                 | OLEC1140    | GCAGTAATACAGGGGCTTTTCAAG                              | F                | NB (use with<br>OLEC1493),<br>RT-PCR |
|                                                                 | OLEC1049    | GGACCATTCAAACAGCATAGCTCTAAAAC                         | R                | NB (repeat)                          |
|                                                                 | OLEC1228    | CAAACAGCATAGCTCTAAAAC                                 | R                | NB (repeat)                          |
|                                                                 | OLEC1684    | TGTTTCATATAAGTTTTGGGACCAT                             |                  | NB (crRNA 24-<br>nt)                 |
|                                                                 | OLEC1493    | GAATAGGAAGGTATCCGACTGCTGG                             | R                | NB (use with<br>OLEC1140)            |
|                                                                 | OLEC1141    | CAAATTGAGTTATGTTTCATATAAG                             | R                | RT-PCR                               |
| <b>crRNA (CRISPR02) expression in <i>S. pyogenes</i> SF370</b>  |             |                                                       |                  |                                      |
| CRISPR02 leader                                                 | OLEC1219    | GCTTTCACAGAAACACCTTGC                                 | F                | NB, RT-PCR                           |
| CRISPR02 spacer 1                                               | OLEC1220    | TTGGTGATTTTCGTGATATGC                                 | R                | NB, RT-PCR                           |
| CRISPR02 plus strand                                            | OLEC1180    | CAAAAAATAACTTAAAAAAGAAGCGAAATGG                       | R                | NB, RT-PCR                           |
|                                                                 | OLEC1182    | CATGGGTGAGTGGATTGAAAT                                 | R                | NB, RT-PCR                           |
| CRISPR02 minus strand                                           | OLEC1181    | ATTTCAATCCACTCACCCATG                                 | F                | NB, RT-PCR                           |
|                                                                 | OLEC1179    | AACGGATGGCACACATAGAGGTGTTTAAAG                        | F                | NB, RT-PCR                           |
| <b>CRISPR01 Cas gene expression in <i>S. pyogenes</i> SF370</b> |             |                                                       |                  |                                      |
| CRISPR01 <i>csn1</i>                                            | OLEC1480    | CAGTGCGCAAAGTATTGTCCATGC                              | F                | RT-PCR                               |
|                                                                 | OLEC1193    | GATTAAGTCTTTTTAACTTCCTTATATCC                         | R                | RT-PCR                               |
| CRISPR01 <i>cas1</i>                                            | OLEC1479    | CTGATTTTCGATTTTCATAAACAATC                            | R                | RT-PCR                               |
|                                                                 | OLEC1192    | GAGAATTTATTTAATACACTTTTTGGGAA                         | F                | RT-PCR                               |
| CRISPR01 <i>cas2</i>                                            | OLEC1477    | ATACTTATGTTTGATATGCCGACGG                             | F                | RT-PCR                               |
|                                                                 | OLEC1478    | ACTGTTTTCCGTGACCGTTAGTAA                              | R                | RT-PCR                               |
|                                                                 | OLEC1191    | AATAGAAAATTGATGCATGATAAACCCCTTC                       | R                | RT-PCR                               |
| CRISPR01 <i>csn2</i>                                            | OLEC1476    | GGCGGTACAATTCTTGCTCGAAGATG                            | F                | RT-PCR                               |
|                                                                 | OLEC1190    | CATTTTCTAAGCATTCAAAGACAATCAGTT                        | R                | RT-PCR                               |
| <b>CRISPR02 Cas gene expression in <i>S. pyogenes</i> SF370</b> |             |                                                       |                  |                                      |
| CRISPR02 <i>cas3</i>                                            | OLEC1487    | GACTAATCTTAGTATGCGTTATGCG                             | F                | RT-PCR                               |
|                                                                 | OLEC1189    | GCAGGGATTGAACTTCATCTAGAATCACAA                        | R                | RT-PCR                               |
| CRISPR02 <i>cas5d</i><br>( <i>csd5d</i> )                       | OLEC1486    | GACAGGCACTGAATGGTATCGTTGATG                           | F                | RT-PCR                               |
|                                                                 | OLEC1188    | AACATTCTCTGTACCCAAAAACACATCTC                         | R                | RT-PCR                               |
| CRISPR02 <i>csd1</i>                                            | OLEC1484    | GCAAGCTAATGAGCGTATTGAAGATG                            | F                | RT-PCR                               |
|                                                                 | OLEC1186    | CATTGGTACTACGCGTAATTTGAAGGCTGG                        | R                | RT-PCR                               |
| CRISPR02 <i>csd2</i>                                            | OLEC1485    | GGAACAGCTTACCGATAAGCATAGAGG                           | F                | RT-PCR                               |
|                                                                 | OLEC1187    | TATAACAGGAGGCGTATCGTCATCATCATC                        | R                | RT-PCR                               |
| CRISPR02 <i>cas4</i>                                            | OLEC1483    | CAATGGCTTGATAATGAAGCGACAGCG                           | F                | RT-PCR                               |
|                                                                 | OLEC1185    | GTATCCACAACTTTTGGTAACCATTTCCC                         | R                | RT-PCR                               |
| CRISPR02 <i>cas1</i>                                            | OLEC1482    | GTCTGCTTTGGTGAAGTTATGTACGG                            | F                | RT-PCR                               |

| Purpose                                   | Primer code                                | Sequence 5'-3' <sup>a</sup>                            | F/R <sup>b</sup>                      | Usage <sup>c</sup> |
|-------------------------------------------|--------------------------------------------|--------------------------------------------------------|---------------------------------------|--------------------|
|                                           | OLEC1184                                   | AAAGAGTCTTTATTATCTGCTGCCTGAACC                         | R                                     | RT-PCR             |
| CRISPR02 <i>cas2</i>                      | OLEC1481                                   | GACACCTTTATCTGGGTCATAGCTG                              | R                                     | RT-PCR             |
|                                           | OLEC1183                                   | AAAACAGAATTTTGAAACACGTTGCCCATAG                        | R                                     | RT-PCR             |
|                                           | OLEC1498                                   | TTGCCAAACTCTGTGTGGACTATG                               | F                                     | RT-PCR             |
|                                           | <b>Loading controls for Northern blots</b> |                                                        |                                       |                    |
| 5S rRNA                                   | OLEC287                                    | AGTTAAGTGACGATAGCCTAG                                  | F                                     | NB                 |
|                                           | OLEC288                                    | CTAAGCGACTACCTTATCTCA                                  | R                                     | NB                 |
| tmRNA                                     | OLEC448                                    | TTTGGGGTTGTTACGGATTG                                   | F                                     | NB                 |
|                                           | OLEC449                                    | AACATATTTGTCTACGTCCA                                   | R                                     | NB, RT-PCR         |
|                                           | OLEC140                                    | TTCGACAGGCATTATGAG                                     | F                                     | RT-PCR             |
| <b>EC1500 (SF370ΔtracrRNA)</b>            |                                            |                                                        |                                       |                    |
| Up fragment (pEC264)                      | OLEC823                                    | TAGACTCTGCAGGACTGATATCATGGCAGGTAT                      | F                                     | Up                 |
|                                           | OLEC824                                    | CTGTAAGAGCTCTTCTATTCTACTCTGACTGCA                      | R                                     | Up                 |
| Down fragment (pEC264)                    | OLEC821                                    | GACAGCGAGCTCATAGAATGATAACAAAAATAA                      | F                                     | Dw                 |
|                                           | OLEC822                                    | AAGTGCGAATTCATCAGCATATTGATCTCCAAT                      | R                                     | Dw                 |
| PCR checking                              | OLEC486                                    | TAAAACAAGCGTTTTGAAAGC                                  | F                                     | PCR                |
|                                           | OLEC487                                    | TTAATGACCTCCGAAATTAGT                                  | R                                     | PCR, SB            |
|                                           | OLEC839                                    | ACCTGTTTTTATTGGCAAGC                                   | F                                     | PCR, SB            |
|                                           | OLEC840                                    | GGAGCCTTAGTTATTTTCAGT                                  | R                                     | PCR                |
|                                           | OLEC823                                    | TAGACTCTGCAGGACTGATATCATGGCAGGTAT                      | F                                     |                    |
|                                           | OLEC673                                    | TGTTGGAACCATTCAAAACAG                                  | F                                     | PCR                |
| SB checking                               | OLEC703                                    | CGACTCGGTGCCACTTTTTCA                                  | R                                     | Internal probe     |
|                                           | OLEC998                                    | CGAGCGGGATCCGAATTTCTCCTTGATTATTTG                      | F                                     | Internal probe     |
|                                           | OLEC836                                    | TTACTATGTAGCTGGGTATG                                   | F                                     | Dw probe           |
|                                           | OLEC837                                    | CAGAATCTTTCAAGGGATCA                                   | R                                     | Dw probe           |
| Complementation (pEC268)                  | OLEC997                                    | GCGTCGGGATCC TTAATGACCTCCGAAATTAGT                     | F                                     | PCR                |
| Complementation (pEC269)                  | OLEC998                                    | CGAGCGGGATCCGAATTTCTCCTTGATTATTTG                      | F                                     | PCR                |
| Complementation (pEC268/pEC269)           | OLEC996                                    | GCATCGGAATTCGTCAGTCAGAGTAGAATAGAA                      | R                                     | PCR                |
| <b>EC1479 (SF370Δpre-crRNA)</b>           |                                            |                                                        |                                       |                    |
| Up fragment (pEC273)                      | OLEC1132                                   | ATGCAGGGATCC TGAGTTATAGATATATGAGAATG                   | F                                     | Up                 |
|                                           | OLEC1135                                   | CTCAAGTTATCATCGGCAATGTTGGTACCAAGAGTAT TATACCATATTTTTAG | R                                     | LM-PCR             |
| Down fragment (pEC273)                    | OLEC1134                                   | CTAAAAATATGGTATAACTCTTGGTACCAACATTGC CGATGATAACTTTGAG  | F                                     | LM-PCR             |
|                                           | OLEC1133                                   | CTGCATGAATTC CAATAAGGTGGAAAATGTAGG                     | R                                     | Dw                 |
| PCR checking                              | OLEC1136                                   | CAAAGGATGAAGTGGCTAGTTTAC                               | F                                     | PCR                |
|                                           | OLEC1137                                   | GCTTAACCCCATATGGCTTAATC                                | R                                     | PCR                |
|                                           | OLEC1138                                   | ATGAAGGGAAAGGAGTTCCTG                                  | F                                     | PCR                |
|                                           | OLEC1139                                   | TAAAGTCCACATGCCCTGGGG                                  | R                                     | PCR                |
|                                           | OLEC1140                                   | GCAGTAATACAGGGGCTTTTCAAG                               | F                                     | PCR                |
|                                           | OLEC1141                                   | CAAATTGAGTTATGTTTATATAAG                               | R                                     | PCR, RT-PCR        |
| SB checking                               | OLEC1140                                   | GCAGTAATACAGGGGCTTTTCAAG                               | F                                     | Internal probe     |
|                                           | OLEC1141                                   | CAAATTGAGTTATGTTTATATAAG                               | R                                     | Internal probe     |
|                                           | OLEC1197                                   | GAACCGATTCCATTAAGAGGC                                  | F                                     | Up probe           |
|                                           | OLEC1198                                   | TCGTAGCAACCAATTTGTCAA                                  | R                                     | Up probe           |
|                                           | OLEC1199                                   | TTAAGCCATATGGGGTTAAGC                                  | F                                     | Dw probe           |
|                                           | OLEC1200                                   | CGCAAAGAGCATCCTTAGGA                                   | R                                     | Dw probe           |
|                                           | Complementation (pEC299/pEC300)            | OLEC1749                                               | GGTGGTGGATCCCCACGTGAAGTATATGATTTTCCGC | F                  |
| Complementation (pEC299)                  | OLEC1750                                   | GGTGGTGAATTC CAACAAGTCTCAGTGTGCTGAAG                   | R                                     | PCR                |
| Complementation (pEC300)                  | OLEC1751                                   | GGTGGTGAATTC CAATTAATTATTGCGGATATTCCT                  | R                                     | PCR                |
| <b>EC1630 (SF370Δcsn1-cas1-cas2-csn2)</b> |                                            |                                                        |                                       |                    |
| Up fragment (pEC298)                      | OLEC1686                                   | ATGCAGCTGCAGATGTGAAGTGGCTTTTTCAC                       | F                                     | Up                 |
|                                           | OLEC1689                                   | GAAATAATCTTCATCTAAAAATACTGGTACC GCCGATATCTAAGCCTATTGAG | R                                     | LM-PCR             |
| Down fragment (pEC298)                    | OLEC1688                                   | CTCAATAGGCTTAGATATCGGCGGTACCAGTATATTT TAGATGAAGATTATTC | F                                     | LM-PCR             |
|                                           | OLEC1687                                   | CTGCATGAATTC CCGAGGAGCCTGAGCAAAATTC                    | R                                     | Dw                 |
|                                           | OLEC1690                                   | GCTGTGGTATCCTCTTGAGGTGGAC                              | F                                     | PCR                |

| Purpose                           | Primer code | Sequence 5'-3' <sup>a</sup>                              | F/R <sup>b</sup> | Usage <sup>c</sup>   |
|-----------------------------------|-------------|----------------------------------------------------------|------------------|----------------------|
| PCR checking                      | OLEC1705    | GAACCTTATATTCATCAGTG                                     | R                | PCR                  |
|                                   | OLEC1724    | GGTGGTCATATGAATCTTAATTTTTCCCTTACTAG                      | F                | PCR                  |
|                                   | OLEC1476    | GGCGGTACAATTCTTGCTCGAAGATG                               | F                | PCR                  |
|                                   | OLEC1140    | GCAGTAATACAGGGGCTTTCAAG                                  | F                | PCR                  |
|                                   | OLEC996     | GCATCGGAATTCGTCAGTCAGAGTAGAATAGAA                        | R                | PCR                  |
|                                   | OLEC1493    | GAATAGGAAGGTATCCGACTGCTGG                                | R                | PCR                  |
|                                   | OLEC1192    | GAGAATTTATTTAATACACTTTTTGGGAA                            | F                | PCR                  |
|                                   | OLEC1478    | ACTGTTTTCCGTGACCGTTAGTAA                                 | R                | PCR                  |
|                                   | OLEC1014    | GGACTAGCCTTATTTAACTTG                                    | F                | PCR                  |
|                                   | OLEC1141    | CAAATTGAGTTATGTTTATATAAG                                 | R                | PCR                  |
|                                   | OLEC1142    | GAAATTACGAATCTTCTCCTGACG                                 | R                | PCR                  |
| SB checking                       | OLEC1192    | GAGAATTTATTTAATACACTTTTTGGGAA                            | F                | Internal probe       |
|                                   | OLEC1479    | CTGATTTTCGATTTTCATAAACAATC                               | R                | Internal probe       |
|                                   | OLEC998     | CGAGCGGGATCCGAATTTCTCCTTGATTATTG                         | F                | Up probe             |
|                                   | OLEC996     | GCATCGGAATTCGTCAGTCAGAGTAGAATAGAA                        | R                | Up probe             |
|                                   | OLEC1692    | GCTAGTTCGAAATACTTGGCTAAG                                 | F                | Dw probe             |
|                                   | OLEC1687    | CTGCATGAATTCAGGAGCCTGAGCAAAATTC                          | R                | Dw probe             |
| <b>EC1788 (SF370Δ<i>csn1</i>)</b> |             |                                                          |                  |                      |
| Up fragment (pEC315)              | OLEC1686    | ATGCAGCTGCAGATGTGAAGTGGCTTTTTAC                          | F                | Up                   |
|                                   | OLEC1769    | CCACAACAGTACGCCAACCCAGCCATTTTTGCCTCCTA<br>AAATAAAAAGTTTA | R                | LM-PCR               |
| Down fragment (pEC315)            | OLEC1770    | TAAACTTTTTATTTTAGGAGGCCAAAATGGCTGGTTG<br>GCGTACTGTTGTGG  | F                | LM-PCR               |
|                                   | OLEC1771    | CTGCATGAATTCGGCTTTTCGTTCCCTCAGCG                         | R                | Dw                   |
| PCR checking                      | OLEC1014    | GGACTAGCCTTATTTAACTTG                                    | F                | PCR                  |
|                                   | OLEC1690    | GCTGTGGTATCCTCTTGAGGTGGAC                                | F                | PCR                  |
|                                   | OLEC1478    | ACTGTTTTCCGTGACCGTTAGTAA                                 | R                | PCR                  |
|                                   | OLEC1479    | CTGATTTTCGATTTTCATAAACAATC                               | R                | PCR                  |
|                                   | OLEC1774    | GAAATCATCAAACCTCATTATGG                                  | F                | PCR                  |
|                                   | OLEC1775    | CTTATAGGATAATTCGAGTGGG                                   | F                | PCR                  |
|                                   | OLEC1480    | CAGTGCACAAAGTATTGTCCATGC                                 | F                | PCR                  |
|                                   | OLEC1193    | GATTAAGTCTTTTTAACTTCCTTATATCC                            | R                | PCR                  |
| SB checking                       | OLEC1480    | CAGTGCACAAAGTATTGTCCATGC                                 | F                | Internal probe       |
|                                   | OLEC1193    | GATTAAGTCTTTTTAACTTCCTTATATCC                            | R                | Internal probe       |
|                                   | OLEC996     | GCATCGGAATTCGTCAGTCAGAGTAGAATAGAA                        | R                | Up probe             |
|                                   | OLEC998     | CGAGCGGGATCCGAATTTCTCCTTGATTATTG                         | F                | Up probe             |
|                                   | OLEC1192    | GAGAATTTATTTAATACACTTTTTGGGAA                            | F                | Dw probe             |
|                                   | OLEC1479    | CTGATTTTCGATTTTCATAAACAATC                               | R                | Dw probe             |
| Complementation (pEC368)          | OLEC2066    | GGTGGTCTGCAGGTTTGCAGTCAGAGTAGAATAGAA<br>G                | F                | PCR                  |
|                                   | OLEC1744    | CTGCATCCCGGGGGGATAATTCGAGTGGGTATTTAC                     | R                | PCR                  |
| Complementation (pEC369)          | OLEC1718    | GGTGGTCTGCAGATGGATAAGAAATACTCAATAGGC                     | F                | PCR                  |
|                                   | OLEC1744    | CTGCATCCCGGGGGGATAATTCGAGTGGGTATTTAC                     | R                | PCR                  |
| <b>EC1675 (SF370Δ<i>cas1</i>)</b> |             |                                                          |                  |                      |
| Up fragment (pEC312)              | OLEC1763    | ATGCAGCTGCAGGAAATTACACTTGCAAATGGAGAG                     | F                | Up                   |
|                                   | OLEC1764    | CATTCTCATATATCTATAACTCATCAGTCACCTCCTAG<br>CTGACTCAAATC   | R                | LM-PCR               |
| Down fragment (pEC312)            | OLEC1765    | GATTTGAGTCAGCTAGGAGGTGACTGATGAGTTATAG<br>ATATATGAGAATG   | F                | LM-PCR               |
|                                   | OLEC1766    | CTGCATGAATTCATTTTCGTAATCGCACTATTTG                       | R                | Dw                   |
| PCR checking                      | OLEC1767    | CGTCGTTGGAAGTCTTTGATTAAG                                 | F                | PCR                  |
|                                   | OLEC1768    | CAATCCATCACTGGTCTTTATGA                                  | F                | use with<br>OLEC1478 |
|                                   | OLEC1478    | ACTGTTTTCCGTGACCGTTAGTAA                                 | R                | PCR                  |
|                                   | OLEC1701    | GCGCAATTAATTATGCGGATATTC                                 | R                | SEQ                  |
|                                   | OLEC1192    | GAGAATTTATTTAATACACTTTTTGGGAA                            | F                | PCR                  |
|                                   | OLEC1479    | CTGATTTTCGATTTTCATAAACAATC                               | R                | PCR                  |
|                                   | OLEC1192    | GAGAATTTATTTAATACACTTTTTGGGAA                            | F                | Internal probe       |
| SB checking                       | OLEC1479    | CTGATTTTCGATTTTCATAAACAATC                               | R                | Internal probe       |
|                                   | OLEC1480    | CAGTGCACAAAGTATTGTCCATGC                                 | F                | Up probe             |
|                                   | OLEC1193    | GATTAAGTCTTTTTAACTTCCTTATATCC                            | R                | Up probe             |
|                                   | OLEC1476    | GGCGGTACAATTCCTTGCTCGAAGATG                              | F                | Dw probe             |
|                                   | OLEC1198    | TCGTAGCAACCAATTTGTCAA                                    | R                | Dw probe             |
|                                   | OLEC1746    | CACAACAGTACGCCAACCCAGCCATTTTTGCCTCCTAA                   | R                | LM-PCR               |

| Purpose                    | Primer code | Sequence 5'-3' <sup>a</sup>                            | F/R <sup>b</sup> | Usage <sup>c</sup>          |
|----------------------------|-------------|--------------------------------------------------------|------------------|-----------------------------|
| Complementation (pEC306)   |             | AATAAAAAG                                              |                  | Use with OLEC1743           |
|                            | OLEC1747    | CTTTTATTTTAGGAGGCCAAAAATGGCTGGTTGGCGTACTGTTGTG         | F                | LM-PCR                      |
|                            | OLEC1748    | CTGCATGAATTCATATCCTAAATTCAGGAAC                        | R                | PCR                         |
| <b>EC1793 (SF370Δcas2)</b> |             |                                                        |                  |                             |
| Up fragment (pEC313)       | OLEC1776    | ATGCAGCTGCAGCATCAATCCATCACTGGTCT                       | F                | Up                          |
|                            | OLEC1777    | CTAGTAAGGAAAAATTAAGATTCATATCCTAAATTCAGGAATCCTTTCCC     | R                | LM-PCR                      |
| Down fragment (pEC313)     | OLEC1778    | GGGAAAGGAGTTCTGAATTTAGGATATGAATCTTAA TTTTCTTACTAG      | F                | LM-PCR                      |
|                            | OLEC1779    | CTGCATGAATTCGCTCTAAAACAAAAAGCGCAAG                     | R                | Dw                          |
| PCR checking               | OLEC1477    | ATACTTATGTTTGATATGCCGACGG                              | F                | Internal                    |
|                            | OLEC1478    | ACTGTTTTCCGTGACCGTTAGTAA                               | R                | Internal                    |
|                            | OLEC1192    | GAGAATTTATTTAATACACTTTTTGGGAA                          | F                | Up-dw                       |
|                            | OLEC1198    | TCGTAGCAACCAATTTGTCAA                                  | R                | Up-dw                       |
|                            | OLEC1773    | CGCTGCTTTAAATATTTTGATAC                                | F                | Upup-dwdw                   |
|                            | OLEC1701    | GCGCAATTAATTTGCGGATATTC                                | R                | Upup-dwdw                   |
|                            | OLEC1476    | GGCGGTACAATTCCTGTGCTCGAAGATG                           | F                | SEQ                         |
| SB checking                | OLEC1477    | ATACTTATGTTTGATATGCCGACGG                              | F                | Internal probe              |
|                            | OLEC1478    | ACTGTTTTCCGTGACCGTTAGTAA                               | R                | Internal probe              |
|                            | OLEC1192    | GAGAATTTATTTAATACACTTTTTGGGAA                          | F                | Up probe                    |
|                            | OLEC1479    | CTGATTTGATTTTCATAAACAATC                               | R                | Up probe                    |
|                            | OLEC1476    | GGCGGTACAATTCCTGTGCTCGAAGATG                           | F                | Dw probe                    |
|                            | OLEC1198    | TCGTAGCAACCAATTTGTCAA                                  | R                | Dw probe                    |
| Complementation (pEC308)   | OLEC1752    | GTATCATTCTCATATATCTATAACTCATTTTTGCCTCC TAAAATAAAAAG    | R                | LM-PCR<br>Use with OLEC1743 |
|                            | OLEC1753    | CTTTTATTTTAGGAGGCCAAAAATGAGTTATAGATATA TGAGAATGATAC    | F                | LM-PCR                      |
|                            | OLEC1754    | CTGCATGAATTC TTAAGATTCATCAAAGCCTC                      | R                | PCR                         |
| <b>EC1796 (SF370Δcsn2)</b> |             |                                                        |                  |                             |
| Up fragment (pEC314)       | OLEC1780    | ATGCAGCTGCAGGATTTTGAATCAATCTTGC                        | F                | Up                          |
|                            | OLEC1781    | GTATTACTGCATTTATTAAGAGTATTAATTAAGATTCA TCAAAGCCTCCC    | R                | LM-PCR                      |
| Down fragment (pEC314)     | OLEC1782    | GGGAGGCTTTTGATGAATCTTAATTAATACTCTTAATA AATGCAGTAATAC   | F                | LM-PCR                      |
|                            | OLEC1783    | CTGCATGAATTC CAGGAGCCTGAGCAAAATTC                      | R                | Dw                          |
| PCR checking               | OLEC1493    | GAATAGGAAGGTATCCGACTGCTGG                              | R                | SEQ                         |
|                            | OLEC1768    | CAATCCATCACTGGTCTTTATGA                                | F                | PCR                         |
|                            | OLEC1701    | GCGCAATTAATTTGCGGATATTC                                | R                | SEQ                         |
|                            | OLEC1476    | GGCGGTACAATTCCTGTGCTCGAAGATG                           | F                | PCR                         |
|                            | OLEC1198    | TCGTAGCAACCAATTTGTCAA                                  | R                | PCR                         |
|                            | OLEC1477    | ATACTTATGTTTGATATGCCGACGG                              | F                | PCR                         |
|                            | OLEC1050    | GCACTATTTGTCTCAGCTAGACTTCAGTCT                         | R                | PCR                         |
|                            | OLEC1142    | GAAATTACGAATCTTCTCCTGACG                               | R                | PCR                         |
| SB checking                | OLEC1476    | GGCGGTACAATTCCTGTGCTCGAAGATG                           | F                | Internal probe              |
|                            | OLEC1198    | TCGTAGCAACCAATTTGTCAA                                  | R                | Internal probe              |
|                            | OLEC1192    | GAGAATTTATTTAATACACTTTTTGGGAA                          | F                | Up probe                    |
|                            | OLEC1479    | CTGATTTGATTTTCATAAACAATC                               | R                | Up probe                    |
|                            | OLEC1140    | GCAGTAATACAGGGGCTTTTCAAG                               | F                | Dw probe                    |
|                            | OLEC1701    | GCGCAATTAATTTGCGGATATTC                                | R                | Dw probe                    |
| Complementation (pEC307)   | OLEC1755    | CATCTAGTAAGGAAAAATTAAGATTCATTTTTGCCTCC TAAAATAAAAAG    | R                | LM-PCR<br>Use with OLEC1743 |
|                            | OLEC1756    | CTTTTATTTTAGGAGGCCAAAAATGAATCTTAATTTTT CCTTACTAGATG    | F                | LM-PCR                      |
|                            | OLEC1757    | CTGCATGAATTC TTATACCATATTTTAGTTA                       | R                | PCR                         |
| <b>EC1636 (SF370Δrnc)</b>  |             |                                                        |                  |                             |
| Up fragment (pEC297)       | OLEC1654    | ATGCAGGGATCCTGTGATGATAGGATGACAGG                       | F                | Up                          |
|                            | OLEC1657    | CATTTTTAGCAGCATCTTGCTCCGGTACC TTAATTTG AATATCAAAGATG   | R                | LM-PCR                      |
| Down fragment (pEC297)     | OLEC1656    | CATCTTTTGATATTTCAATTTAAGGTACC CGGAGCAAGA TGCTGCTAAAATG | F                | LM-PCR                      |

| Purpose                                                                                                                         | Primer code | Sequence 5'-3' <sup>a</sup>                              | F/R <sup>b</sup> | Usage <sup>c</sup>                                          |
|---------------------------------------------------------------------------------------------------------------------------------|-------------|----------------------------------------------------------|------------------|-------------------------------------------------------------|
|                                                                                                                                 | OLEC1655    | CTGCATGAATTCCTGCTTGAAAACCATCCAATTG                       | R                | Dw                                                          |
| PCR checking                                                                                                                    | OLEC1658    | GTCAGCCATGACGCTATTGATCCTC                                | F                | PCR                                                         |
|                                                                                                                                 | OLEC1659    | CTAATGCATTGCTCAATTCGTTTAAAC                              | R                | PCR                                                         |
|                                                                                                                                 | OLEC1661    | GATATGTCTAAGTTACGTTCCATG                                 | F                | PCR                                                         |
|                                                                                                                                 | OLEC1730    | GCATCTTGCTCCGCTAATTTTTTAG                                | R                | PCR                                                         |
|                                                                                                                                 | OLEC1665    | GATGTTTAATAAATCACGAAAAATC                                | F                | PCR                                                         |
|                                                                                                                                 | OLEC1666    | CCTACGACTGCAGTTACTCCCTTATC                               | R                | PCR                                                         |
|                                                                                                                                 | OLEC1660    | GGCATATTTACCGAAATGGAGATAG                                | F                | SEQ                                                         |
| SB checking                                                                                                                     | OLEC1661    | GATATGTCTAAGTTACGTTCCATG                                 | F                | Internal probe                                              |
|                                                                                                                                 | OLEC1730    | CTGCATGAATTCGCATGGGCAGGTCCCTTCTCAC                       | R                | Internal probe                                              |
|                                                                                                                                 | OLEC1663    | GTACCTACTGCTAAATCTGCCATAG                                | R                | Up probe                                                    |
|                                                                                                                                 | OLEC1654    | ATGCAGGGATCCGTGTCAGTGATAGGATGACAGG                       | F                | Up probe                                                    |
|                                                                                                                                 | OLEC1664    | CTAGTCAAAGATATTGATATAGCTC                                | F                | Dw probe                                                    |
|                                                                                                                                 | OLEC1655    | CTGCATGAATTCCTGCTTGAAAACCATCCAATTG                       | R                | Dw probe                                                    |
| Complementation (pEC322)                                                                                                        | OLEC1667    | ATGCACGGATCCCTGTAGTTTTGGCTTGCTGATC                       | F                | PCR                                                         |
|                                                                                                                                 | OLEC1668    | ATGCACGAATTCCTTTTAAAAACATCTAAACCTCAC                     | R                | PCR                                                         |
| <b>pre-crRNA and tracrRNA homologue expression and processing in <i>S. mutans</i> UA159</b>                                     |             |                                                          |                  |                                                             |
| crRNA repeat                                                                                                                    | OLEC1679    | GAACCATTCGAAACAACACAGCTCTAAAAC                           |                  | NB                                                          |
| crRNA (repeat-spacer)                                                                                                           | OLEC1680    | GCTCTAAAACCTACCATATTAATTAATG                             |                  | NB                                                          |
| tracrRNA homologue                                                                                                              | OLEC1678    | CACTGCCTTATTTAACTTGCTGTG                                 |                  | NB                                                          |
| <b>pre-crRNA and tracrRNA homologue expression and processing in <i>S. thermophilus</i> LMD-9 (1<sup>st</sup> CRISPR locus)</b> |             |                                                          |                  |                                                             |
| crRNA repeat                                                                                                                    | OLEC1673    | GAACCATTCGAAACAACACAGCTCTAAAAC                           |                  | NB                                                          |
| crRNA (repeat-spacer)                                                                                                           | OLEC1674    | CAGCTCTAAAACCTAAGTACTCGTAC                               |                  | NB                                                          |
| tracrRNA homologue                                                                                                              | OLEC1672    | GCCTTATTTAACTCGCTGTGTTG                                  |                  | NB                                                          |
| <b>pre-crRNA and tracrRNA homologue expression and processing in <i>S. thermophilus</i> LMD-9 (2<sup>nd</sup> CRISPR locus)</b> |             |                                                          |                  |                                                             |
| crRNA repeat                                                                                                                    | OLEC1670    | GTTGTACAGTTACTTAAATCTTGAGAGTAC                           |                  | NB                                                          |
| crRNA (repeat-spacer)                                                                                                           | OLEC1671    | GAGAGTACAAAAACGTTAGTAGATGAC                              |                  | NB                                                          |
| tracrRNA homologue                                                                                                              | OLEC1669    | CGGCATGAAGCCTTATCTTTGTAGC                                |                  | NB                                                          |
| <b>pre-crRNA and tracrRNA homologue expression and processing in <i>S. epidermidis</i> RP62a</b>                                |             |                                                          |                  |                                                             |
| crRNA repeat                                                                                                                    | OLEC1712    | GTTCTCGTCCCCTTTTCTTCGGGGTGGGTATC                         |                  | NB                                                          |
| crRNA (repeat-spacer)                                                                                                           | OLEC1714    | GGCTTTAAAGAAGTATGATTCGATAACCACC                          |                  | NB                                                          |
| Additional repeats                                                                                                              | OLEC1713    | GGTGGGTATCGATCCTTTGTACTGATG                              |                  | NB                                                          |
| <b>pre-crRNA and tracrRNA homologue expression and processing in <i>L. innocua</i> Clip11262</b>                                |             |                                                          |                  |                                                             |
| crRNA repeat                                                                                                                    | OLEC1676    | GTTAGCATTCAAAATAACATAGCTCTAAAAC                          |                  | NB                                                          |
| crRNA (repeat-spacer)                                                                                                           | OLEC1677    | CATAGCTCTAAAACATAATGAGTTAG                               |                  | NB                                                          |
| tracrRNA homologue                                                                                                              | OLEC1675    | CGGACAAAGCCTTATTTAACTTGC                                 |                  | NB                                                          |
| <b>pre-crRNA and tracrRNA homologue expression and processing in <i>N. meningitidis</i> Z2491</b>                               |             |                                                          |                  |                                                             |
| crRNA (repeat-spacer)                                                                                                           | JVO-4863    | CGAAATGAGAAAGGGAGCTACAAC                                 |                  | NB                                                          |
| tracrRNA homologue                                                                                                              | JVO-4862    | ATCTTTTCAGACGGCCTTATTGTAGC                               |                  | NB                                                          |
| <b>In vitro tracrRNA and CRISPR01 crRNAs</b>                                                                                    |             |                                                          |                  |                                                             |
| T7-tracrRNAs                                                                                                                    | JVO-4831    | GTTTTTTTTAATACGACTCACTATAGGGTATTAAGTATGTTTTATGGCTGATAAAT | F                | T7-tracrRNA (167 nt form)                                   |
|                                                                                                                                 | JVO-4832    | GTTTTTTTTAATACGACTCACTATAGGGTTGGAACCA TTCAAAACAGC        | F                | T7-tracrRNA (86 nt form)                                    |
|                                                                                                                                 | JVO-4833    | AAAAGCACCGACTCGGTG                                       | R                | T7-tracrRNA (both forms)                                    |
| T7-crRNAs                                                                                                                       | JVO-4837    | GTTTTTTTTAATACGACTCACTATAGGTTGATTTCTTCTTGCGCTT           | F                | T7-cr148 (1 <sup>st</sup> spacer to 3 <sup>rd</sup> spacer) |
|                                                                                                                                 | JVO-4841    | CAATTAATTATTGCGGATATTCCT                                 | R                | T7-cr148 (1 <sup>st</sup> spacer to 3 <sup>rd</sup> spacer) |
|                                                                                                                                 | JVO-4836    | GTTTTTTTTAATACGACTCACTATAGGAATAAATGCA GTAATACAGGGG       | F                | T7-cr213 (leader to 2 <sup>nd</sup> repeat-spacer)          |
|                                                                                                                                 | JVO-4840    | AGTTATGTTTCATATAAGTTTTGGGAC                              | R                | T7-cr213 (leader to 2 <sup>nd</sup> repeat-spacer)          |
| Mismatch introduction                                                                                                           | JVO-7371    | TTCATTTGACGTATCGTCTAAAACAAAAAGCGCAA                      | R                | cr148-M12-A fragment                                        |
|                                                                                                                                 | JVO-7374    | TAGACGATACGTCAAATGAATGGTCCCAAAACTTAT                     | F                | cr148-M12-B fragment                                        |
|                                                                                                                                 | JVO-7377    | CTTCGATACGACAAATGAATGGTCCCAACGGAGA                       | R                | tracrRNA-M12-                                               |

| Purpose                                                                         | Primer code | Sequence 5'-3' <sup>a</sup>                                    | F/R <sup>b</sup> | Usage <sup>c</sup>                    |
|---------------------------------------------------------------------------------|-------------|----------------------------------------------------------------|------------------|---------------------------------------|
|                                                                                 | JVO-7380    | TCATTTGTCGTATCGAAGTTAAAATAAGGCTAGTCCG                          | F                | A fragment<br>tracrRNA-M12-B fragment |
| <b><i>speM</i> expression in <i>S. pyogenes</i> MGAS8232 (M18)</b>              |             |                                                                |                  |                                       |
| <i>speM</i>                                                                     | OLEC1557    | <i>TGAGAGTGTCTTTTCAGATGCTGTG</i>                               | F                | RT-PCR                                |
|                                                                                 | OLEC1558    | <i>AGCGGTATCTGTTCCCAAAA</i>                                    | R                | RT-PCR, NB                            |
| <b>Plasmids used for CRISPR01 transformation read-out in <i>S. pyogenes</i></b> |             |                                                                |                  |                                       |
| pEC367                                                                          | OLEC2071    | ATGCAC <u>CTGCAG</u> TGAAAAAAAAATACCTTG                        | F                | Promoter less- <i>speM</i>            |
|                                                                                 | OLEC1556    | ATGCACGGATCCAGCTGCTCTAAGTCTACTAAAACC                           | R                | Promoter less- <i>speM</i>            |
| pEC287                                                                          | OLEC1555    | ATGCACCTGCAGGATGCTGTAAATAATTGTATAC                             | F                | <i>PspeM-speM</i>                     |
|                                                                                 | OLEC1556    | ATGCACGGATCCAGCTGCTCTAAGTCTACTAAAACC                           | R                | <i>speM</i>                           |
| pEC289                                                                          | OLEC1593    | ATGAGCGATAATAGAATAAAGTTATATGAGCATAACT<br>CAATTTGTAAAAAGGGTATTG | F                | GAA->GAG                              |
|                                                                                 | OLEC1594    | CAATACCCTTTTTACAAATTGAGTTATGCTCATATAA<br>CTTTATTCTATTATCGCTCAT | R                | GAA->GAG                              |
| pEC290                                                                          | OLEC1595    | GCGATAATAGAATAAAGTTATATGAACATAACTCAATC<br>TGTA AAAAAGGGTATTGGG | F                | ATT->ATC                              |
|                                                                                 | OLEC1596    | CCCAATACCCTTTTTACAGATTGAGTTATGTTTCATAT<br>AACTTTATTCTATTATCGC  | R                | ATT->ATC                              |
| pEC138                                                                          | OLEC132     | ATCTAGCTGCAGTTC AATTGAAAAGGCAAC                                | F                | <i>PsagA</i> -5'UTR- <i>sagA</i>      |
|                                                                                 | OLEC219     | TTTGAAGGATCC AAGGTTTACCTCCTTATCTAATAAG                         | R                | <i>PsagA</i> -5'UTR- <i>sagA</i>      |
| <b>Verification of plasmid constructs by PCR or sequencing analysis</b>         |             |                                                                |                  |                                       |
| ColE1                                                                           | OLEC1560    | GAAGTACATCCGCAACTGTC                                           | F                | SEQ                                   |
|                                                                                 | OLEC1562    | GTGATGCTCGTCAGGGGG                                             | F                | SEQ                                   |
| <i>repA</i> s                                                                   | oliRN228    | GGAACGAAAACTCACGTTAA                                           | R                | SEQ                                   |
|                                                                                 | oliRN229    | AGGTTCTTGATGCTGAAACG                                           | R                | SEQ                                   |

<sup>a</sup> *italic*, sequence annealing to the template; underlined, restriction site; **bold**, T7 promoter.

<sup>b</sup> F, forward primer; R, reverse primer.

<sup>c</sup> LM-PCR, PCR-mediated ligation; NB, probe for Northern blot; PE, primer extension; SB, probe for Southern blot; SEQ, sequencing SL, self-ligation (RNA mapping by head-to-tail circularization).



## References to Supplementary Tables

1. Ferretti, J. J. *et al.* Complete genome sequence of an M1 strain of *Streptococcus pyogenes*. *Proc. Natl. Acad. Sci. U. S. A.* **98**, 4658-4663 (2001).
2. Sumbly, P. *et al.* Evolutionary origin and emergence of a highly successful clone of serotype M1 group A *Streptococcus* involved multiple horizontal gene transfer events. *J. Infect. Dis.* **192**, 771-782 (2005).
3. Beres, S. B. *et al.* Molecular genetic anatomy of inter- and intraserotype variation in the human bacterial pathogen group A *Streptococcus*. *Proc. Natl. Acad. Sci. U. S. A.* **103**, 7059-7064 (2006).
4. Beres, S. B. *et al.* Genome sequence of a serotype M3 strain of group A *Streptococcus*: phage-encoded toxins, the high-virulence phenotype, and clone emergence. *Proc. Natl. Acad. Sci. U S A* **99**, 10078-10083 (2002).
5. Nakagawa, I. *et al.* Genome sequence of an M3 strain of *Streptococcus pyogenes* reveals a large-scale genomic rearrangement in invasive strains and new insights into phage evolution. *Genome Res.* **13**, 1042-1055 (2003).
6. Holden, M. T. *et al.* Complete genome of acute rheumatic fever-associated serotype M5 *Streptococcus pyogenes* strain manfredo. *J. Bacteriol.* **189**, 1473-1477 (2007).
7. Banks, D. J. *et al.* Progress toward characterization of the group A *Streptococcus* metagenome: complete genome sequence of a macrolide-resistant serotype M6 strain. *J. Infect. Dis.* **190**, 727-738 (2004).
8. Smoot, J. C., Korgenski, E. K., Daly, J. A., Veasy, L. G. & Musser, J. M. Molecular analysis of group A *Streptococcus* type emm18 isolates temporally associated with acute rheumatic fever outbreaks in Salt Lake City, Utah. *J. Clin. Microbiol.* **40**, 1805-1810 (2002).
9. Green, N. M. *et al.* Genome sequence of a serotype M28 strain of group A streptococcus: potential new insights into puerperal sepsis and bacterial disease specificity. *J. Infect. Dis.* **192**, 760-770 (2005).
10. McShan, W. M. *et al.* Genome sequence of a nephritogenic and highly transformable M49 strain of *Streptococcus pyogenes*. *J. Bacteriol.* **190**, 7773-7785 (2008).
11. Horvath, P. *et al.* Comparative analysis of CRISPR loci in lactic acid bacteria genomes. *Int. J. Food Microbiol.* **131**, 62-70 (2009).
12. Vojtek, I. *et al.* Lysogenic transfer of group A *Streptococcus* superantigen gene among streptococci. *J. Infect. Dis.* **197**, 225-234 (2008).
